# Supplementary material for: Synthesis of a monophosphoryl lipid A derivative and its conjugation to a modified form of a tumor-associated carbohydrate antigen GM3
Source: Royal Society of Chemistry journal article supplement (doi:10.1039/b907351e), 2009-01-01
Supplement: b907351e.pdf [file b907351e.pdf]

## Supplementary Information

For

### Synthesis of a Monophosphoryl Lipid A Derivative and Its Conjugation to a Modified Form of Tumor-Associated Carbohydrate Antigen GM3

Qianli Wang, Jie Xue and Zhongwu Guo\*

Department of Chemistry, Wayne State University, 5101 Cass Avenue, Detroit, MI 48202, USA

#### Table of Contents:

|                       |     |
|-----------------------|-----|
| 1. Experimental       | S-1 |
| 2. NMR and MS Spectra | S-8 |

#### 1. Experimental

**General Methods.** NMR spectra were recorded on a 400 or 500 MHz instrument with chemical shifts reported in ppm ( $\delta$ ) in reference to Me<sub>4</sub>Si if not specified otherwise. Coupling constants ( $J$ ) are reported in hertz (Hz). Optical rotations were determined using an Autopol III polarimeter. High resolution mass spectra (HRMS) were obtained with a Waters Micromass-LCTPremier-XE instrument, and MALDI-TOF MS were performed with a Bruker Ultraflex mass spectrometer. Thin layer chromatography (TLC) was performed on silica gel GF254 plates with detection by phosphomolybdic acid in EtOH or 1% H<sub>2</sub>SO<sub>4</sub> in EtOH. Molecular sieves were dried under high vacuum at 170-180 °C for 6-10 h immediately before use. Commercial anhydrous solvents and other reagents were used without further purification.

#### Scheme S-1: Synthesis of Compound 4.

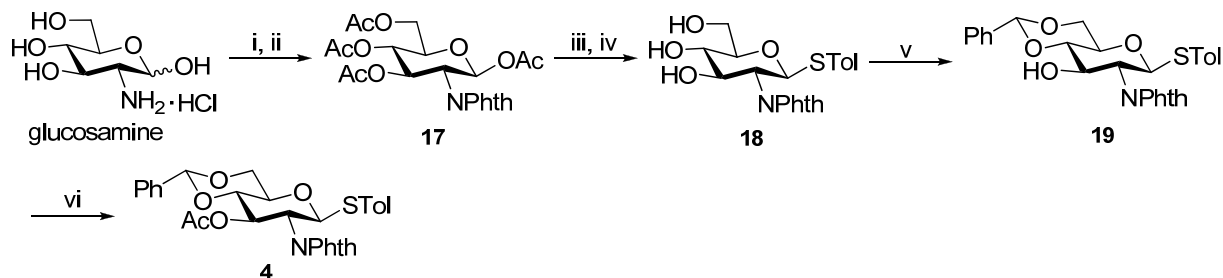

*Reagents and Conditions:* i) Phthalic anhydride, NaOH, H<sub>2</sub>O-MeOH; ii) Ac<sub>2</sub>O, AcONa; iii) TolSH, BF<sub>3</sub>·Et<sub>2</sub>O, CH<sub>2</sub>Cl<sub>2</sub>; iv) MeONa, MeOH-CH<sub>2</sub>Cl<sub>2</sub>; v) PhCH(OMe)<sub>2</sub>, TsOH, DMF; vi) Ac<sub>2</sub>O, TEA, CH<sub>2</sub>Cl<sub>2</sub>

**Compound 17.** After the mixture of D-glucosamine hydrochloride (80.0 g, 0.37 mol), NaOH (15.6 g, 0.39 mol), H<sub>2</sub>O (350 mL), and MeOH (150 mL) was stirred at rt for 1 h, phthalic anhydride (63.2 g, 0.43 mol) was added, and the reaction was stirred at rt overnight. The solid materials were filtered, washed with a small amount of H<sub>2</sub>O, and then dried to produce a solid

intermediate (77.0 g). The mixture of this intermediate (20.0 g, 0.061 mol) and AcONa (13.5 g, 0.164 mol) in Ac<sub>2</sub>O (270 mL) was refluxed for 10 h. After removing most of Ac<sub>2</sub>O in vacuum, the residue was poured into ice-water, and the mixture was extracted with DCM (300 mL). The organic layer was washed with saturated NaHCO<sub>3</sub> solution and brine, dried over anhydrous Na<sub>2</sub>SO<sub>4</sub> and evaporated in vacuum. The residue was recrystallized from EtOAc and hexane to give **17** as a light yellow solid (14.9 g, 52%).

**Compound 18.** To the stirred solution of **17** (26.7 g, 0.056 mol) and *p*-toluenethiol (9.0 g, 0.073 mol) in anhydrous DCM (90 mL) at 0 °C, BF<sub>3</sub>·Et<sub>2</sub>O (10.6 mL, 0.084 mol) was added dropwise. When TLC showed the reaction was completed, the reaction mixture was washed with saturated NaHCO<sub>3</sub> solution and brine, dried over anhydrous Na<sub>2</sub>SO<sub>4</sub>, and concentrated. The residue was then dissolved in DCM (50 mL) and treated with CH<sub>3</sub>ONa/CH<sub>3</sub>OH solution (20 mL, 0.4 M) at rt for 1.5 h. After most of the solvent was removed, the mixture was put in the refrigerator for 2 h, and the mixture was filtered to give **18** as a white solid (10.8 g, 66.7% for two steps). Ref. S. G. Hansen, T. Skrydstrup. *Eur. J. Org. Chem.*, 2007, 3392.

**Compound 19.** The solution of **18** (10.8 g, 26.0 mmol), benzaldehyde dimethyl acetal (5.9 mL, 39.0 mmol) and TsOH·H<sub>2</sub>O (0.29 g, 1.3 mmol) in anhydrous DMF (50 mL) was stirred at 50 °C with occasional vacuum application until TLC showed the reaction was complete. The reaction was quenched with triethylamine, and the mixture was diluted with DCM, washed with brine, dried over anhydrous Na<sub>2</sub>SO<sub>4</sub> and concentrated in vacuum. The residue was purified by flash column chromatography to give **19** as a white solid (11.4 g, 87.0%). Ref. Y. Niu, N. Wang, X. Cao, X. Ye. *Synlett*, 2007, 2116.

**Compound 4.** The mixture of **19** (13.0 g, 26.0 mmol), Ac<sub>2</sub>O (3.7 mL, 39.0 mmol), triethylamine (7.9 mL, 78.0 mmol) and DMAP (12 mg, catalytic amount) in DCM (30 mL) was stirred at rt for 5 h. The reaction mixture was washed with brine, dried over anhydrous Na<sub>2</sub>SO<sub>4</sub> and concentrated. The residue was recrystallized from EtOAc and hexane to give **4** as a white solid (11.0 g, 78.0%).  
<sup>1</sup>H NMR (CDCl<sub>3</sub>, 400 MHz): δ 7.86 (m, 2 H, aromatic H of Phth), 7.75 (m, 2 H, aromatic H of Phth), 7.43 (m, 2 H, aromatic H), 7.35 (m, 3 H, aromatic H), 7.27 (d, *J* = 8.0 Hz, 2 H, aromatic H), 7.07 (d, *J* = 8.0 Hz, 2 H, aromatic H), 5.88 (t, *J* = 9.6 Hz, 1 H, H-3), 5.76 (d, *J* = 10.8 Hz, 1 H, H-1), 5.52 (s, 1 H, PhCH), 4.42 (dd, *J* = 10.4 and 4.8 Hz, 1 H, H-6), 4.33 (t, *J* = 10.8 Hz, 1 H, H-2), 3.85-3.71 (m, 3 H, H-4, H-5, H-6'), 2.32 (s, 3 H, CH<sub>3</sub>), 1.87 (s, 3 H, OAc). <sup>13</sup>C NMR (CDCl<sub>3</sub>, 100 MHz): δ 136.9, 134.4, 133.7, 129.7, 128.2, 127.2, 123.7, 101.7, 84.0, 79.0, 70.7, 68.8, 54.4, 21.2, 20.5.

#### Scheme S-2: Synthesis of Compound 5.

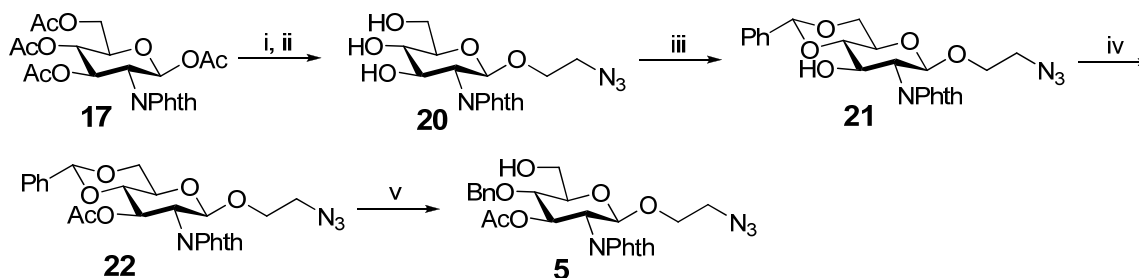

Reagents and Conditions: i) 2-azidoethanol, BF<sub>3</sub>·Et<sub>2</sub>O, CH<sub>2</sub>Cl<sub>2</sub>; ii) MeONa, MeOH; iii) PhCH(OMe)<sub>2</sub>, TsOH, DMF; iv) Ac<sub>2</sub>O, TEA, DMAP, CH<sub>2</sub>Cl<sub>2</sub>; v) BH<sub>3</sub>/THF, TMSOTf

**Compound 20.** To the stirred mixture of **17** (13.5 g, 0.028 mol), 2-azidoethanol (10.0 g, 0.113 mol) and molecular sieve (4 Å, 3.5 g) in anhydrous DCM (40 mL) under argon,  $\text{BF}_3 \cdot \text{Et}_2\text{O}$  (5.4 mL, 0.042 mol) was added dropwise. After the mixture was stirred at rt for 2 days, the reaction was quenched with saturated  $\text{NaHCO}_3$  solution. The mixture was diluted with DCM and filtered through a Celite pad. The filtrate and washings were combined and washed with brine, dried over  $\text{Na}_2\text{SO}_4$ , and concentrated. The residue was then dissolved in MeOH, to which was added  $\text{CH}_3\text{ONa}/\text{CH}_3\text{OH}$  solution (0.4 M) until pH = 9. After at rt for 20 min, the reaction mixture was neutralized with Amberlite IR-120 ( $\text{H}^+$ ) resin, concentrated in vacuum, and finally purified by flash column chromatography to give **20** as syrup (9.0 g, 83.9% for two steps).  $^1\text{H}$  NMR ( $\text{CD}_3\text{OD}$ , 500 MHz):  $\delta$  7.85 (m, 2 H, aromatic H), 7.80 (m, 2 H, aromatic H), 5.25 (d,  $J$  = 8.5 Hz, 1 H, H-1), 4.23 (dd,  $J$  = 11.0 and 8.5 Hz, 1 H, H-2), 4.04-3.98 (m, 2 H, H-3, H-6), 3.94 (dd,  $J$  = 10.0 and 4.0 Hz, 1 H, H-6'), 3.74 (m, 1 H,  $\text{OCH}_2\text{CH}_2\text{N}_3$ ), 3.65-3.60 (m, 1 H, H-5), 3.47-3.38 (m, 2 H, H-4,  $\text{OCH}_2\text{CH}_2\text{N}_3$ ), 3.21-3.17 (m, 1 H,  $\text{CH}_2\text{N}_3$ ).  $^{13}\text{C}$  NMR ( $\text{CD}_3\text{OD}$ , 125 MHz):  $\delta$  134.2, 132.1, 98.6, 77.3, 71.5, 71.4, 68.4, 61.5, 57.3, 50.5, 8.5.

**Compound 21.** It was prepared from **20** (85.5%) following the same procedure described for **19**.  $^1\text{H}$  NMR ( $\text{CDCl}_3$ , 400 MHz):  $\delta$  7.85 (m, 2 H, aromatic H of Phth), 7.73 (m, 2 H, aromatic H of Phth), 7.46 (m, 2 H, aromatic H), 7.37 (m, 3 H, aromatic H), 5.55 (s, 1 H,  $\text{PhCH}$ ), 5.32 (d,  $J$  = 8.5 Hz, 1 H, H-1), 4.61-4.56 (m, 1 H, H-3), 4.36 (dd,  $J$  = 10.4 and 4.0 Hz, 1 H, H-6), 4.24 (dd,  $J$  = 10.4 and 8.8 Hz, 1 H, H-6'), 3.98-3.93 (m, 1 H,  $\text{OCH}_2\text{CH}_2\text{N}_3$ ), 3.83-3.79 (m, 1 H, H-2), 3.65-3.57 (m, 3 H, H-4, H-5,  $\text{OCH}_2\text{CH}_2\text{N}_3$ ), 3.37-3.30 (m, 1 H,  $\text{CH}_2\text{N}_3$ ), 3.23 (d, 1 H, OH), 3.19-3.13 (m, 1 H,  $\text{CH}_2\text{N}_3$ ).  $^{13}\text{C}$  NMR ( $\text{CDCl}_3$ , 100 MHz):  $\delta$  162.9, 137.3, 134.3, 132.0, 129.5, 128.6, 128.4, 126.6, 123.6, 102.1, 99.2, 82.3, 68.8, 68.7, 66.5, 56.8, 50.7, 36.7, 31.6. Ref. J. Xue, J. Zhu, R. E. Marchant, Z. Guo. *Org. Lett.*, 2005, 7, 3753.

**Compound 22.** It was prepared from **21** (77.4%) following the same procedure described for **4**.  $^1\text{H}$  NMR ( $\text{CDCl}_3$ , 400 MHz):  $\delta$  7.85 (m, 2 H, aromatic H of Phth), 7.73 (m, 2 H, aromatic H of Phth), 7.46 (m, 2 H, aromatic H), 7.37 (m, 3 H, aromatic H), 5.85 (t,  $J$  = 9.2 Hz, 1 H, H-3), 5.55 (s, 1 H,  $\text{PhCH}$ ), 5.53 (d,  $J$  = 8.4 Hz, 1 H, H-1), 4.41 (dd,  $J$  = 10.4 and 4.8 Hz, 1 H, H-6), 4.32 (dd,  $J$  = 10.4 and 8.0 Hz, 1 H, H-6'), 4.02-3.98 (m, 1 H,  $\text{OCH}_2\text{CH}_2\text{N}_3$ ), 3.88-3.74 (m, 3 H, H-2, H-4,  $\text{OCH}_2\text{CH}_2\text{N}_3$ ), 3.68-3.63 (m, 1 H, H-5), 3.41-3.34 (m, 1 H,  $\text{CH}_2\text{N}_3$ ), 3.19-3.13 (m, 1 H,  $\text{CH}_2\text{N}_3$ ), 1.89 (s, 3 H, OAc).  $^{13}\text{C}$  NMR ( $\text{CDCl}_3$ , 100 MHz):  $\delta$  134.5, 129.4, 128.5, 126.5, 123.8, 101.9, 99.0, 79.5, 69.9, 69.1, 68.9, 66.6, 55.5, 50.6, 20.8.

**Compound 5.** To a stirred solution of **22** (3.0 g, 6.0 mmol) in  $\text{BH}_3 \cdot \text{THF}$  at 0 °C, TMSOTf (1.5 mL) was added dropwise. After the mixture was stirred at 0 °C for another hour, the reaction was quenched by triethylamine and MeOH. The solution was then concentrated and purified by flash column chromatography to give **5** as a white solid (2.0 g, 66.0%).  $^1\text{H}$  NMR ( $\text{CDCl}_3$ , 500 MHz):  $\delta$  7.82 (m, 2 H, aromatic H of Phth), 7.70 (m, 2 H, aromatic H of Phth), 7.32 (m, 2 H, aromatic H), 7.26 (m, 3H, aromatic H), 5.77 (dd,  $J$  = 10.5 and 9.0 Hz, 1 H, H-3), 5.50 (d,  $J$  = 9.6 Hz, 1 H, H-1), 4.66 (d,  $J$  = 11.0 Hz, 2 H,  $\text{PhCH}_2$ ), 4.20 (dd,  $J$  = 10.5 and 8.5 Hz, 1 H, H-2), 3.99-3.89 (m, 2 H, H-6,  $\text{OCH}_2\text{CH}_2\text{N}_3$ ), 3.82 (m, 2 H, H-5, H-6'), 3.67-3.62 (m, 2 H, H-4,  $\text{OCH}_2\text{CH}_2\text{N}_3$ ), 3.35-3.30 (m, 1 H,  $\text{CH}_2\text{N}_3$ ), 3.18-3.14 (m, 1 H,  $\text{CH}_2\text{N}_3$ ), 1.76 (s, 3 H, OAc).  $^{13}\text{C}$  NMR ( $\text{CDCl}_3$ , 125 MHz):  $\delta$  171.5, 134.4, 134.3, 128.8, 128.7, 128.2, 128.0, 123.7, 98.4, 79.2, 76.4, 75.7, 75.6, 75.0, 73.3, 72.0, 69.0, 61.9, 56.9, 56.9, 55.3, 50.6, 20.8.

**Compound 6.** After a mixture of **4** (1.6 g, 2.94 mmol), **5** (1.0 g, 1.96 mmol) and 4Å molecular sieves (4 g) was stirred at rt in anhydrous dichloromethane (DCM) for 2 h under an Argon atmosphere, it was cooled to -50 °C, and then NIS (1.34 g, 5.88 mmol) and AgOTf (0.05 g, 0.2 mmol) were added. The mixture was stirred at rt for 2 days and then quenched by the addition of triethylamine. The molecular sieves were filtered off with a Celite pad and washed with DCM. The filtrate and washings were combined and washed with saturated Na<sub>2</sub>S<sub>2</sub>O<sub>3</sub> solution and brine, dried over anhydrous Na<sub>2</sub>SO<sub>4</sub> and evaporated in vacuo. The residue was purified by flash column chromatography (toluene and AcOEt 10:1) to give **6** as a white solid (0.98 g, 54%). *R*<sub>f</sub> = 0.40 (toluene and AcOEt 4:1). <sup>1</sup>H NMR (CDCl<sub>3</sub>, 400 MHz): δ 7.82-7.78 (m, 4 H), 7.70-7.66 (m, 4 H), 7.46 (m, 2 H), 7.37-7.35 (m, 3 H), 7.26-7.23 (m, 3 H), 7.06-7.03 (m, 2 H), 5.88 (t, *J* = 8.8 Hz, 1 H, H-3'), 5.65 (dd, *J* = 10.4, 8.8 Hz, 1 H, H-3), 5.58 (d, *J* = 8.8 Hz, 1 H, H-1'), 5.56 (s, 1 H, PhCH), 5.35 (d, *J* = 8.8 Hz, 1 H, H-1), 4.46-4.36 (m, 4 H, H-6', H-2', PhCH<sub>2</sub>), 4.14-4.08 (m, 2 H, H-6, H-2), 3.88 (d, *J* = 10.4 Hz, 1 H, H-4'), 3.84-3.73 (m, 4 H, H-6, H-6', H-5', OCH<sub>2</sub>CH<sub>2</sub>N<sub>3</sub>), 3.67-3.62 (m, 1 H, H-5), 3.58-3.51 (m, 2 H, H-4, OCH<sub>2</sub>CH<sub>2</sub>N<sub>3</sub>), 3.31-3.24 (m, 1 H, CH<sub>2</sub>N<sub>3</sub>), 3.08-3.03 (m, 1 H, CH<sub>2</sub>N<sub>3</sub>), 1.90 (s, 3 H, OAc), 1.71 (s, 3 H, OAc). <sup>13</sup>C NMR (CDCl<sub>3</sub>, 100 MHz): δ 170.5, 170.2, 137.6, 137.1, 134.5, 134.3, 129.4, 128.6, 128.5, 128.1, 127.7, 126.5, 123.8, 123.6, 101.9, 98.7, 98.1, 79.4, 77.6, 74.8, 73.2, 70.0, 68.9, 68.8, 68.2, 66.6, 55.5, 55.1, 50.1, 20.8, 20.7. HR ESI MS (*m/z*) calcd. for C<sub>48</sub>H<sub>45</sub>N<sub>5</sub>O<sub>15</sub>Na (M + Na)<sup>+</sup> 954.2810, found 954.2813.

**Compound 7.** After a mixture of **6** (0.58 g, 0.63 mmol) and hydrazine monohydrate (5.5 mL) in ethanol (30 mL) was refluxed for 2 h, it was concentrated in vacuo, and the residue was purified by flash column chromatography (CH<sub>2</sub>Cl<sub>2</sub> and MeOH 15:1 to 10:1) to afford **7** as a white solid (0.27 g, 73%). *R*<sub>f</sub> = 0.65 (CH<sub>2</sub>Cl<sub>2</sub> and MeOH 7:1). <sup>1</sup>H NMR (CD<sub>3</sub>OD, 400 MHz): δ 7.50-7.47 (m, 2 H), 7.40-7.28 (m, 8 H), 5.57 (s, 1 H, PhCH), 4.95 (d, *J* = 11.2 Hz, 1 H, PhCH<sub>2</sub>), 4.64 (d, *J* = 10.4 Hz, 1 H, PhCH<sub>2</sub>), 4.37 (d, *J* = 8.4 Hz, 1 H, H-1'), 4.27 (d, *J* = 8.0 Hz, 1 H, H-1), 4.24 (dd, *J* = 10.4, 4.8 Hz, 1 H, H-6'), 4.09 (dd, *J* = 11.2 and 2.4 Hz, 1 H, H-6), 4.06-4.01 (m, 1 H, OCH<sub>2</sub>CH<sub>2</sub>N<sub>3</sub>), 3.79-3.68 (m, 3 H, H-6, H-6', OCH<sub>2</sub>CH<sub>2</sub>N<sub>3</sub>), 3.55-3.34 (m, 8 H, H-3, H-3', H-4, H-4', H-5, H-5', CH<sub>2</sub>N<sub>3</sub>), 2.73 (t, *J* = 8.8 Hz, 1 H, H-2'), 2.65 (dd, *J* = 10.4, 8.0 Hz, 1 H, H-2). <sup>13</sup>C NMR (CD<sub>3</sub>OD, 100 MHz): δ 138.0, 128.7, 128.2, 127.9, 127.8, 127.6, 126.3, 104.4, 103.4, 101.9, 81.6, 78.7, 76.6, 74.8, 74.6, 72.9, 68.9, 68.7, 68.5, 66.9, 57.9, 57.4, 50.8. HR ESI MS (*m/z*): calcd for C<sub>28</sub>H<sub>38</sub>N<sub>5</sub>O<sub>9</sub> (M + H)<sup>+</sup>, 588.2670; found, 588.2647.

**Compound 9.** After the solution of EDC·HCl (391 mg, 2.0 mmol) and **8** (260 mg, 0.6 mmol) in anhydrous DCM (8 mL) and DMF (0.5 mL) was stirred at rt for 0.5 h, it was cooled to 0 °C, and then a solution of **7** (120 mg, 0.2 mmol) in DMF (1.5 mL) was added. The mixture was stirred at rt overnight and then diluted with DCM, washed with brine, dried over anhydrous Na<sub>2</sub>SO<sub>4</sub> and evaporated in vacuo. The residue was purified by flash column chromatography (CH<sub>2</sub>Cl<sub>2</sub> and MeOH 40:1) to give **9** as a white solid (230 mg, 80%). *R*<sub>f</sub> = 0.40 (CH<sub>2</sub>Cl<sub>2</sub> and MeOH 20:1). <sup>1</sup>H NMR (CDCl<sub>3</sub>, 400 MHz): δ 7.50-7.47 (m, 2 H), 7.37-7.29 (m, 8 H), 6.19 (d, *J* = 4.8 Hz, 1 H, NH'), 5.99 (d, *J* = 6.8 Hz, 1 H, NH), 5.53 (s, 1 H, PhCH), 5.19-5.13 (m, 1 H, lipid), 5.11-5.05 (m, 1 H, lipid), 4.98 (d, *J* = 11.2 Hz, 1 H, PhCH<sub>2</sub>), 4.81 (d, *J* = 8.8 Hz, 1 H, H-1), 4.64 (d, *J* = 11.2 Hz, 1 H, PhCH<sub>2</sub>), 4.62 (d, *J* = 3.2 Hz, 1 H, 3-OH), 4.58 (d, *J* = 8.0 Hz, 1 H, H-1'), 4.30 (dd, *J* = 10.8 and 4.0 Hz, 1 H, H-6), 4.17 (dt, *J* = 9.2 and 3.2 Hz, 1 H, H-3'), 4.09 (dd, *J* = 11.2 and 2.4 Hz, 1 H, H-6'), 4.06-4.01 (m, 1 H, OCH<sub>2</sub>CH<sub>2</sub>N<sub>3</sub>), 3.99 (d, *J* = 3.2 Hz, 1 H, 3'-OH), 3.93 (dt, *J* = 9.6 and 3.2 Hz, 1 H, H-3), 3.77-3.70 (m, 3 H, H-6, H-6', OCH<sub>2</sub>CH<sub>2</sub>N<sub>3</sub>), 3.56-3.31 (m, 8 H, H-2, H-2', H-4, H-4', H-5, H-5', OCH<sub>2</sub>CH<sub>2</sub>N<sub>3</sub>), 2.48 (d, *J* = 6.4 Hz, 2 H, lipid), 2.37-2.26 (m, 6 H, lipid),

1.66-1.50 (m, 8 H, lipid), 1.25 (br, 68 H, 34 x CH<sub>2</sub>, lipid), 0.87 (t, *J* 6.4 Hz, 12 H, 4 x CH<sub>3</sub>, lipid). <sup>13</sup>C NMR (CDCl<sub>3</sub>, 100 MHz): δ 174.6, 174.5, 172.1, 171.5, 138.5, 137.3, 129.3, 128.7, 128.5, 128.3, 128.1, 126.6, 102.1, 100.8, 100.3, 81.7, 78.5, 76.2, 74.9, 74.7, 71.7, 71.5, 71.1, 68.8, 68.2, 66.5, 59.1, 58.3, 50.9, 42.6, 36.7, 34.8, 32.1, 31.7, 29.9, 29.7, 29.6, 29.4, 25.5, 25.2, 22.9, 14.3. HR ESI MS (*m/z*): calcd for C<sub>80</sub>H<sub>133</sub>N<sub>5</sub>NaO<sub>15</sub> (M + Na)<sup>+</sup>, 1426.9696; found, 1426.9696.

**Compound 10.** After the solution of EDC·HCl (205 mg, 1.07 mmol) and lauric acid (142 mg, 0.712 mmol) in anhydrous DCM (5 mL) was stirred at rt for 20 min, a solution of **9** (100 mg, 0.07 mmol) and N,N-dimethylaminopyridine (DMAP, 8.7 mg, 0.07 mmol) in DCM (5 mL) was added. The mixture was stirred at 45 °C overnight, and it was then diluted with DCM, washed with brine, dried over anhydrous Na<sub>2</sub>SO<sub>4</sub> and evaporated in vacuo. The residue was purified by flash column chromatography (CH<sub>2</sub>Cl<sub>2</sub> and acetone 30:1 to 20:1) to give **10** as a white solid (110 mg, 87.3%). R<sub>f</sub> = 0.40 (CH<sub>2</sub>Cl<sub>2</sub> and acetone 20:1). <sup>1</sup>H NMR (CDCl<sub>3</sub>, 400 MHz): δ 7.43-7.40 (m, 2 H), 7.35-7.21 (m, 8 H), 5.97 (d, *J* = 7.2 Hz, 2 H, NH, NH'), 5.48 (s, 1 H, PhCH), 5.24 (t, *J* = 10.0 Hz, 1 H, H-3'), 5.17-5.00 (m, 3 H, H-3, 2 H lipid), 4.70 (d, *J* = 8.4 Hz, 1 H, H-1), 4.61-4.52 (m, 3 H, H-1', PhCH<sub>2</sub>), 4.32 (dd, *J* = 10.4, 4.8 Hz, 1 H, H-6'), 4.06-3.90 (m, 4 H, H-2, H-2', H-6, OCH<sub>2</sub>CH<sub>2</sub>N<sub>3</sub>), 3.79-3.64 (m, 4 H, H-4', H-6, H-6', OCH<sub>2</sub>CH<sub>2</sub>N<sub>3</sub>), 3.61-3.42 (m, 4 H, H-4, H-5, H-5', CH<sub>2</sub>N<sub>3</sub>), 3.37-3.31 (m, 1 H, CH<sub>2</sub>N<sub>3</sub>), 2.47-2.40 (m, 2 H, lipid), 2.34-2.15 (m, 6 H, lipid), 1.64-1.48 (m, 12 H, lipid), 1.24 (br, 104 H, 52 x CH<sub>2</sub>, lipid), 0.87 (t, *J* = 6.4 Hz, 18 H, 6 x CH<sub>3</sub>, lipid). <sup>13</sup>C NMR (CDCl<sub>3</sub>, 100 MHz): δ 174.0, 173.9, 173.8, 169.9, 169.7, 137.8, 137.1, 129.3, 128.7, 128.4, 128.2, 127.9, 126.3, 102.2, 101.5, 100.7, 79.0, 76.4, 75.3, 74.6, 71.5, 71.3, 71.2, 68.8, 68.1, 67.1, 66.7, 54.7, 53.6, 51.0, 42.1, 41.8, 34.8, 34.7, 34.5, 34.3, 32.1, 29.9, 29.8, 29.7, 29.6, 29.5, 29.4, 29.3, 25.5, 25.3, 25.0, 22.9, 14.3. HR ESI MS (*m/z*): calcd for C<sub>104</sub>H<sub>177</sub>N<sub>5</sub>NaO<sub>17</sub> (M + Na)<sup>+</sup>, 1791.3037; found, 1791.3024.

**Compound 11.** After the mixture of **10** (85 mg, 48 μmol), NaBH<sub>3</sub>CN (45 mg, 0.72 mmol) and 4Å molecular sieves (1 g) in dry THF (10 mL) was stirred at rt for 2 h, it was cooled to 0 °C, and then HCl (1 M in dry ether) was added dropwise until the pH = 2. After the reaction mixture was stirred at 0 °C for 1 h and at rt for 3 h, triethylamine (0.5 mL) was added to terminate the reaction. The molecular sieves were filtered off through a Celite pat and washed with DCM. The filtrate and washings were combined and washed with saturated NaHCO<sub>3</sub> solution and brine, dried over anhydrous Na<sub>2</sub>SO<sub>4</sub> and finally evaporated in vacuo. The residue was purified by flash column chromatography (CH<sub>2</sub>Cl<sub>2</sub> and acetone 15:1) to give **11** as a white solid (60 mg, 70.6%). R<sub>f</sub> = 0.25 (CH<sub>2</sub>Cl<sub>2</sub> and acetone 15:1). [α]<sub>D</sub><sup>24</sup> -15.0 (*c* 1.0, CHCl<sub>3</sub>). <sup>1</sup>H NMR (CDCl<sub>3</sub>, 400 MHz): δ 7.36-7.19 (m, 10 H), 5.96-5.90 (m, 2 H, NH', NH), 5.15-4.98 (m, 4 H, H-3', H-3, and 2 H of lipid), 4.64 (d, *J* = 8.8 Hz, 1 H, H-1), 4.60-4.50 (m, 5 H, H-1', 2 x PhCH<sub>2</sub>), 4.04-3.85 (m, 4 H, H-2', H-2, H-6', OCH<sub>2</sub>CH<sub>2</sub>N<sub>3</sub>), 3.79-3.63 (m, 5 H, H-4, 2 x H-6, H-6', OCH<sub>2</sub>CH<sub>2</sub>N<sub>3</sub>), 3.60-3.48 (m, 3 H, H-4', H-5', H-5), 3.46-3.38 (m, 1 H, CH<sub>2</sub>N<sub>3</sub>), 3.33-3.26 (m, 1 H, CH<sub>2</sub>N<sub>3</sub>), 2.46-2.12 (m, 8 H, lipid), 1.66-1.46 (m, 12 H, lipid), 1.25 (br, 104 H, 52 x CH<sub>2</sub>, lipid), 0.87 (t, *J* = 6.4 Hz, 18 H, 6 x CH<sub>3</sub>, lipid). <sup>13</sup>C NMR (CDCl<sub>3</sub>, 100 MHz): δ 174.8, 174.0, 173.9, 169.9, 169.8, 137.8, 128.7, 128.6, 128.1, 128.0, 127.9, 101.4, 100.8, 76.5, 75.2, 74.7, 74.2, 74.0, 71.3, 71.2, 70.7, 67.9, 67.3, 54.0, 53.7, 50.9, 42.0, 41.8, 34.7, 34.4, 34.3, 32.2, 29.9, 29.8, 29.7, 29.6, 29.5, 29.4, 25.5, 25.3, 25.2, 25.0, 22.9, 14.3. MALDI-TOF MS (*m/z*): calcd for C<sub>104</sub>H<sub>179</sub>N<sub>5</sub>O<sub>17</sub>, 1770.3; found, 1793.3 (M + Na)<sup>+</sup>.

**Compound 3.** To the stirred solution of **11** (38 mg, 21 μmol) in dry DCM (3 mL), dibenzyl diisopropylphosphoramidite **12** (21 μL, 64 μmol) and 1*H*-tetrazole (~0.45 M in CH<sub>3</sub>CN, 0.24 mL,

0.107 mmol) were added. After the mixture was stirred at rt for 2 h and then cooled to -20 °C, *t*-BuOOH (~5.5 M in CH<sub>3</sub>CN, 39 μL, 0.214 mmol) was added, and the mixture was stirred at rt for another 2 h. The solvent was removed in vacuo, and the residue was purified by flash column chromatography (CH<sub>2</sub>Cl<sub>2</sub> and MeOH 60:1) to give **3** as syrup (36.5 mg, 84%). *R*<sub>f</sub> = 0.45 (CH<sub>2</sub>Cl<sub>2</sub> and MeOH 40:1). [α]<sub>D</sub><sup>24</sup> -9.0 (*c* 0.5, CHCl<sub>3</sub>). <sup>1</sup>H NMR (CDCl<sub>3</sub>, 400 MHz): δ 7.33-7.19 (m, 20 H), 5.87 (d, *J* = 8.8 Hz, 1 H, NH'), 5.80 (d, *J* = 8.8 Hz, 1 H, NH), 5.31 (dd, *J* = 10.4 and 8.8 Hz, 1 H, H-3'), 5.13-5.04 (m, 2 H, H-3 and 1 H of lipid), 5.02-4.95 (m, 1 H, lipid), 4.91-4.85 (m, 4 H, (PhCH<sub>2</sub>O)<sub>2</sub>P), 4.77 (d, *J* = 8.4 Hz, 1 H, H-1'), 4.54 (s, 2 H, PhCH<sub>2</sub>), 4.51 (d, *J* = 8.0 Hz, 1 H, H-1), 4.48-4.41 (m, 3 H, H-4', PhCH<sub>2</sub>), 4.05-3.88 (m, 3 H, H-2, H-6, OCH<sub>2</sub>CH<sub>2</sub>N<sub>3</sub>), 3.84-3.68 (m, 3 H, H-2', H-6', H-6), 3.67-3.47 (m, 5 H, OCH<sub>2</sub>CH<sub>2</sub>N<sub>3</sub>, H-6', H-5', H-5, H-4), 3.46-3.39 (m, 1 H, CH<sub>2</sub>N<sub>3</sub>), 3.32-3.25 (m, 1 H, CH<sub>2</sub>N<sub>3</sub>), 2.45-2.35 (m, 2 H, lipid), 2.32-2.12 (m, 8 H, lipid), 1.64-1.36 (m, 10 H, lipid), 1.34-1.08 (br, 104 H, 52 x CH<sub>2</sub>, lipid), 0.87 (t, *J* = 6.4 Hz, 18 H, 6 x CH<sub>3</sub>, lipid). <sup>13</sup>C NMR (CDCl<sub>3</sub>, 100 MHz): δ 128.8, 128.7, 128.6, 128.1, 128.0, 127.8, 101.0, 100.8, 76.5, 75.2, 74.7, 74.6, 74.5, 74.3, 73.6, 72.6, 71.3, 71.1, 70.7, 69.8, 69.7, 68.9, 68.3, 67.3, 54.8, 53.7, 50.9, 42.0, 41.9, 34.7, 34.4, 34.1, 32.1, 29.9, 29.8, 29.7, 29.6, 29.4, 25.6, 25.2, 25.0, 24.8, 22.9, 14.4. <sup>31</sup>P NMR (CDCl<sub>3</sub>, 161 MHz): δ -1.11. HR ESI MS (*m/z*): calcd for C<sub>118</sub>H<sub>192</sub>N<sub>5</sub>NaO<sub>20</sub>P (M + Na)<sup>+</sup>, 2053.3796; found, 2053.3835.

**Compound 13.** A suspension of **3** (25 mg, 12 μmol), active zinc dust (25.0 mg, 0.38 mmol), and acetic acid (7 μL, 0.12 mmol) in DCM (2 mL) was stirred at rt for 24 h, and then solid materials were removed by filtration and washed with DCM. The combined filtrates were neutralized with DIPEA, washed with brine, dried over anhydrous Na<sub>2</sub>SO<sub>4</sub>, and then concentrated in vacuo. The product [HR ESI MS (*m/z*): calcd for C<sub>118</sub>H<sub>195</sub>N<sub>3</sub>O<sub>20</sub>P (M + H)<sup>+</sup>, 2005.4072, found, 2005.4142] was used for the next step of reaction without further purification. The solution of the obtained crude amine, succinic anhydride (5 mg, 49 μmol), DIPEA (20 μL, 0.12 mmol) and a catalytic amount of DMAP in DCM (2 mL) and DMF (0.5 mL) was stirred at rt overnight. The mixture was concentrated in vacuo and co-evaporated with toluene a couple of times, and the residue was purified by flash column chromatography (CH<sub>2</sub>Cl<sub>2</sub> and MeOH 30:1) to give **13** as a white solid (18 mg, 70%). *R*<sub>f</sub> = 0.3 (CH<sub>2</sub>Cl<sub>2</sub> and MeOH 20:1). [α]<sub>D</sub><sup>24</sup> -12.0 (*c* 0.25, CHCl<sub>3</sub>). <sup>1</sup>H NMR (CDCl<sub>3</sub>, 400 MHz): δ 7.34-7.16 (m, 20 H), 6.61 (m, 1 H, OCH<sub>2</sub>CH<sub>2</sub>NH), 6.34 (d, *J* = 8.8 Hz, 1 H, NH), 5.94 (d, *J* = 8.8 Hz, 1 H, NH), 5.43 (t, *J* = 9.6 Hz, 1 H, H-3'), 5.10-4.97 (m, 3 H, H-3 and 2 H of lipid), 4.93-4.83 (m, 4 H, (PhCH<sub>2</sub>O)<sub>2</sub>P), 4.78 (d, *J* = 8.0 Hz, 1 H, H-1'), 4.57-4.43 (m, 5 H, H-4', 2 x PhCH<sub>2</sub>), 4.34 (d, *J* = 8.0 Hz, 1 H, H-1), 4.06-3.95 (m, 2 H, H-2, H-6), 3.84-3.76 (m, 2 H, H-2', H-6'), 3.74-3.61 (m, 5 H, OCH<sub>2</sub>CH<sub>2</sub>NH, H-5', H-6, H-6'), 3.60-3.45 (m, 3 H, OCH<sub>2</sub>CH<sub>2</sub>NH, H-5, H-4), 3.28-3.20 (m, 1 H, OCH<sub>2</sub>CH<sub>2</sub>NH), 2.82-2.72 (m, 1 H, CH<sub>2</sub>CH<sub>2</sub>COOH), 2.64-2.46 (m, 3 H, CH<sub>2</sub>CH<sub>2</sub>COOH), 2.46-2.38 (m, 2 H, lipid), 2.34-2.10 (m, 8 H, lipid), 1.64-1.35 (m, 10 H, lipid), 1.34-1.02 (br, 104 H, 52 x CH<sub>2</sub>, lipid), 0.87 (t, *J* = 5.4 Hz, 18 H, 6 x CH<sub>3</sub>, lipid). <sup>13</sup>C NMR (CDCl<sub>3</sub>, 125 MHz): δ 174.3, 174.3, 174.2, 173.9, 170.3, 170.3, 138.3, 137.8, 135.7, 128.8, 128.7, 128.6, 128.2, 128.1, 128.0, 127.9, 127.8, 101.4, 100.9, 75.0, 74.8, 74.7, 74.3, 73.6, 72.7, 71.5, 69.9, 69.8, 68.9, 68.3, 54.8, 54.0, 42.0, 41.6, 40.2, 34.8, 34.5, 34.3, 34.2, 32.2, 29.9, 29.8, 29.7, 29.6, 29.5, 29.4, 25.6, 25.5, 25.3, 25.0, 24.8, 22.9, 14.4. <sup>31</sup>P NMR (CDCl<sub>3</sub>, 161 MHz): δ -1.36. HR ESI MS (*m/z*): calcd for C<sub>122</sub>H<sub>198</sub>N<sub>3</sub>NaO<sub>23</sub>P (M + Na)<sup>+</sup>, 2127.4051; found, 2127.4089.

**Compound 14.** To a stirred solution of **13** (18 mg, 8 μmol) and *p*-nitrophenol (5.9 mg, 42 μmol) in DCM (5 mL) was added EDC·HCl (8.2 mg, 42 μmol) in an ice bath. After the mixture was stirred at rt for 5 h, it was diluted with DCM, washed with brine, dried over anhydrous Na<sub>2</sub>SO<sub>4</sub>,

and condensed in vacuo. The residue was purified on a TLC plate (CH<sub>2</sub>Cl<sub>2</sub> and MeOH 20:1) to give **14** as a white solid (16 mg, 83.5%).  $R_f$  = 0.55 (CH<sub>2</sub>Cl<sub>2</sub> and MeOH 20:1).  $[\alpha]_D^{24}$  -10.0 (*c* 0.65, CHCl<sub>3</sub>). <sup>1</sup>H NMR (CDCl<sub>3</sub>, 400 MHz):  $\delta$  8.24-8.19 (m, 2 H), 7.34-7.16 (m, 22 H), 6.73 (m, 1 H, OCH<sub>2</sub>CH<sub>2</sub>NH), 6.09 (d, *J* 8.8 Hz, 1 H, NH), 5.78 (d, *J* = 9.2 Hz, 1 H, NH), 5.32 (t, *J* = 8.8 Hz, 1 H, H-3'), 5.08-5.03 (m, 1 H, lipid), 5.00-4.94 (m, 2 H, H-3 and 1 H of lipid), 4.92-4.83 (m, 4 H, (PhCH<sub>2</sub>O)<sub>2</sub>P), 4.71 (d, *J* = 8.0 Hz, 1 H, H-1'), 4.57-4.49 (m, 2 H, PhCH<sub>2</sub>), 4.48-4.40 (m, 3 H, H-4', PhCH<sub>2</sub>), 4.31 (d, *J* = 8.0 Hz, 1 H, H-1), 4.06-3.88 (m, 2 H, H-6, H-2), 3.83-3.71 (m, 3 H, H-2', H-6', OCH<sub>2</sub>CH<sub>2</sub>NH), 3.69-3.58 (m, 4 H, OCH<sub>2</sub>CH<sub>2</sub>NH, H-5', H-6, H-6'), 3.55-3.34 (m, 4 H, H-5, H-4, OCH<sub>2</sub>CH<sub>2</sub>NH), 2.92 (t, *J* = 7.6 Hz, 2 H, CH<sub>2</sub>COOPhNO<sub>2</sub>), 2.62 (t, *J* = 7.6 Hz, 2 H, CH<sub>2</sub>CH<sub>2</sub>COOPhNO<sub>2</sub>), 2.44-2.35 (m, 2 H, lipid), 2.30-2.12 (m, 8 H, lipid), 1.70-1.36 (m, 10 H, lipid), 1.34-1.02 (br, 104 H, 52 x CH<sub>2</sub>, lipid), 0.87 (t, *J* = 6.4 Hz, 18 H, 6 x CH<sub>3</sub>, lipid). <sup>13</sup>C NMR (CDCl<sub>3</sub>, 125 MHz):  $\delta$  174.2, 174.1, 173.9, 173.8, 171.7, 171.4, 170.4, 170.2, 155.7, 145.5, 138.2, 137.7, 135.6, 135.5, 128.9, 128.8, 128.7, 128.6, 128.3, 128.2, 128.1, 128.0, 127.9, 127.8, 125.4, 122.7, 101.5, 101.0, 76.4, 74.8, 74.5, 74.4, 73.6, 72.5, 71.3, 71.2, 70.0, 69.9, 69.8, 68.9, 68.5, 68.0, 54.8, 54.3, 42.2, 41.9, 40.2, 34.8, 34.5, 34.4, 34.2, 32.2, 30.5, 29.9, 29.8, 29.7, 29.6, 29.5, 29.4, 25.6, 25.3, 25.0, 24.8, 22.9, 14.4. <sup>31</sup>P NMR (CDCl<sub>3</sub>, 161 MHz):  $\delta$  -1.04. HR ESI MS (*m/z*): calcd for C<sub>128</sub>H<sub>201</sub>N<sub>4</sub>NaO<sub>25</sub>P (M + Na)<sup>+</sup>, 2248.4215; found, 2248.4226.

**Compound 16.** To a stirred solution of **14** (12 mg, 5  $\mu$ mol) and **15** (6 mg, 8  $\mu$ mol) in DMF (1.5 mL), *N*-methylmorpholine (NMM, 6  $\mu$ L, 54  $\mu$ mol) was added at 0 °C. The reaction mixture was stirred at rt overnight, and then DMF was removed in vacuo. The residue was purified on a TLC plate (CH<sub>2</sub>Cl<sub>2</sub> and MeOH 3:1) to give **16** as a white solid (10 mg, 65%).  $R_f$  = 0.2 (CH<sub>2</sub>Cl<sub>2</sub> and MeOH 3:1).  $[\alpha]_D^{24}$  -4.5 (*c* 0.38, CHCl<sub>3</sub> and MeOH 4:1). <sup>1</sup>H NMR (CDCl<sub>3</sub> and CD<sub>3</sub>OD 6:1, 500 MHz):  $\delta$  7.24-7.09 (m, 25 H), 5.30 (t, *J* = 10.0 Hz, 1 H, H-3'), 5.02-4.91 (m, 3 H, H-3, and 2 H of lipid), 4.81-4.73 (m, 4 H, (PhCH<sub>2</sub>O)<sub>2</sub>P), 4.68 (d, *J* = 8.0 Hz, 1 H, H-1'), 4.47-4.40 (m, 2 H, PhCH<sub>2</sub>), 4.39-4.33 (m, 3 H, H-4', PhCH<sub>2</sub>), 4.32 (d, *J* = 8.0 Hz, 1 H, H-1"), 4.28 (d, *J* = 9.0 Hz, 1 H, H-1), 4.17 (d, *J* = 7.5 Hz, 1 H, H-1'''), 3.99-3.94 (m, 2 H, H-6), 3.94-3.40 (m, 31 H), 3.38-3.16 (m, 5 H), 2.40-2.32 (m, 4H), 2.29 (dd, *J* = 15.0 and 6.0 Hz, 1 H, H-3"e of GM<sub>3</sub>), 2.25-2.00 (m, 11 H, lipid and H-3"a of GM<sub>3</sub>), 1.67-1.34 (m, 10 H, lipid), 1.30-0.98 (br, 104 H, 52 x CH<sub>2</sub>, lipid), 0.84-0.70 (m, 18 H, 6 x CH<sub>3</sub>, lipid). <sup>13</sup>C NMR (CDCl<sub>3</sub> and CD<sub>3</sub>OD 6:1, 125 MHz):  $\delta$  129.0, 128.8, 128.6, 128.5, 128.4, 128.0, 127.8, 127.7, 127.6, 127.1, 103.9, 102.9, 101.2, 100.5, 80.0, 77.5, 76.5, 76.1, 75.4, 74.9, 74.6, 74.2, 73.9, 73.7, 73.4, 73.3, 72.4, 72.3, 71.5, 71.2, 70.9, 69.9, 69.8, 69.2, 68.8, 68.5, 68.1, 67.5, 63.4, 61.7, 60.9, 54.4, 53.7, 52.7, 49.4, 49.2, 49.1, 48.9, 42.8, 41.1, 40.9, 39.6, 39.4, 34.5, 34.2, 34.0, 31.9, 31.0, 30.9, 29.7, 29.5, 29.4, 29.3, 25.4, 25.1, 24.8, 24.6, 22.7, 14.0. <sup>31</sup>P NMR (CDCl<sub>3</sub> and CD<sub>3</sub>OD 6:1, 161 MHz):  $\delta$  -1.52. HR ESI MS (*m/z*): calcd for C<sub>153</sub>H<sub>244</sub>N<sub>5</sub>Na<sub>2</sub>O<sub>41</sub>P (M + 2Na)<sup>2+</sup>, 1442.3342; found, 1442.3287.

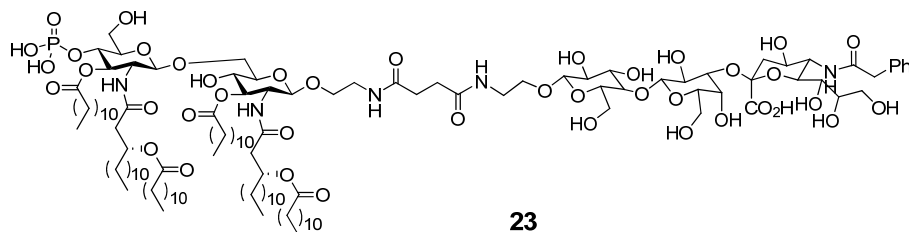

**Compound 23.** A mixture of **16** (7.5 mg, 2.64  $\mu$ mol) and 10% Pd-C (5.0 mg) in DCM-MeOH (1:1, 4 mL) was stirred under an atmosphere of H<sub>2</sub> at rt for 1 day. Thereafter, the catalyst was

removed by filtration through a Celite pad, and the Celite pad was subsequently washed with DCM-MeOH (1:1) and MeOH. The combined filtrates were concentrated in vacuum, and the residue was purified by a short silica gel column (eluent: DCM/MeOH 1:3) to give **23** as a white solid (4.0 mg, 61.5%).  $R_f = 0.25$  ( $\text{CH}_2\text{Cl}_2/\text{MeOH}$  1:3).  $^1\text{H}$  NMR ( $\text{CDCl}_3\text{-CD}_3\text{OD}$ , 500 MHz):  $\delta$   $^{31}\text{P}$ -NMR( $\text{CDCl}_3\text{-CD}_3\text{OD}$ , 161 MHz):  $\delta$  2.875.

## 2. NMR and MS Spectra

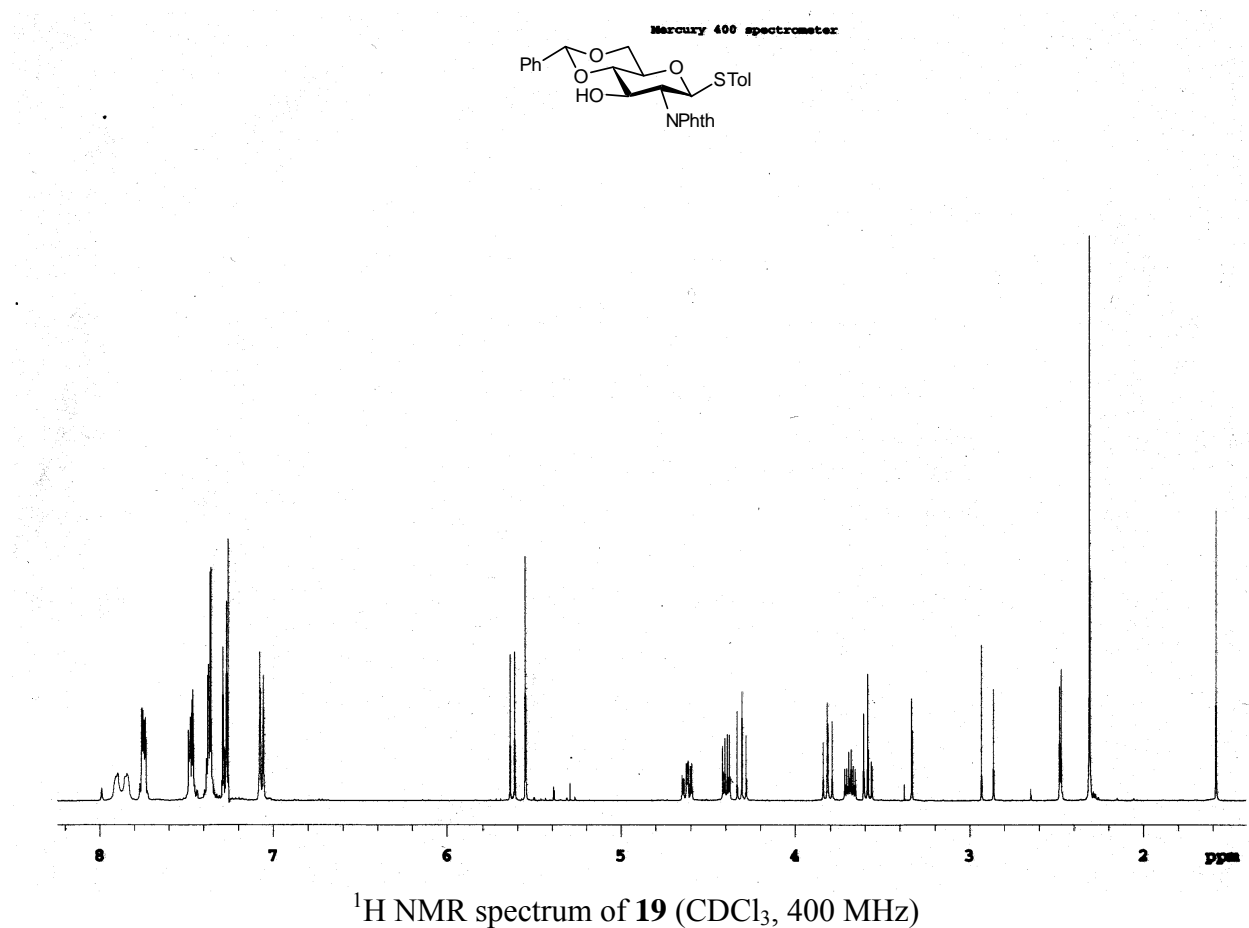



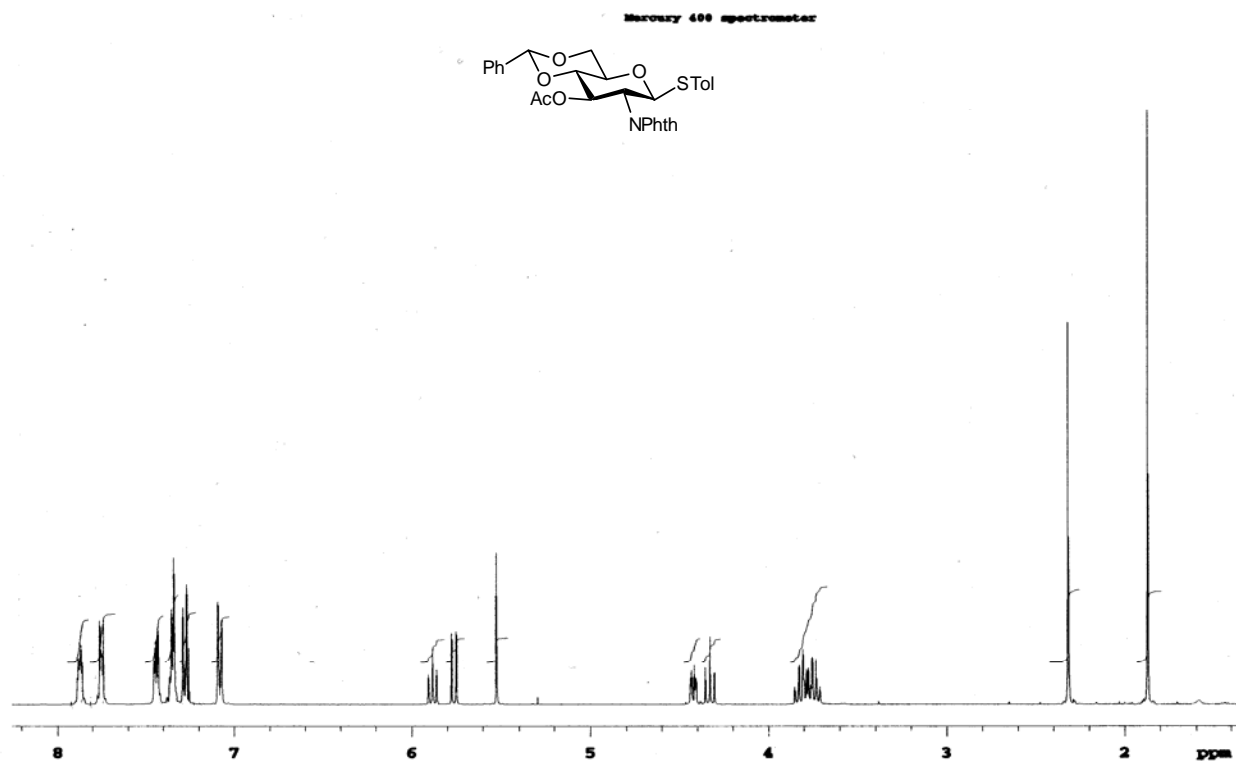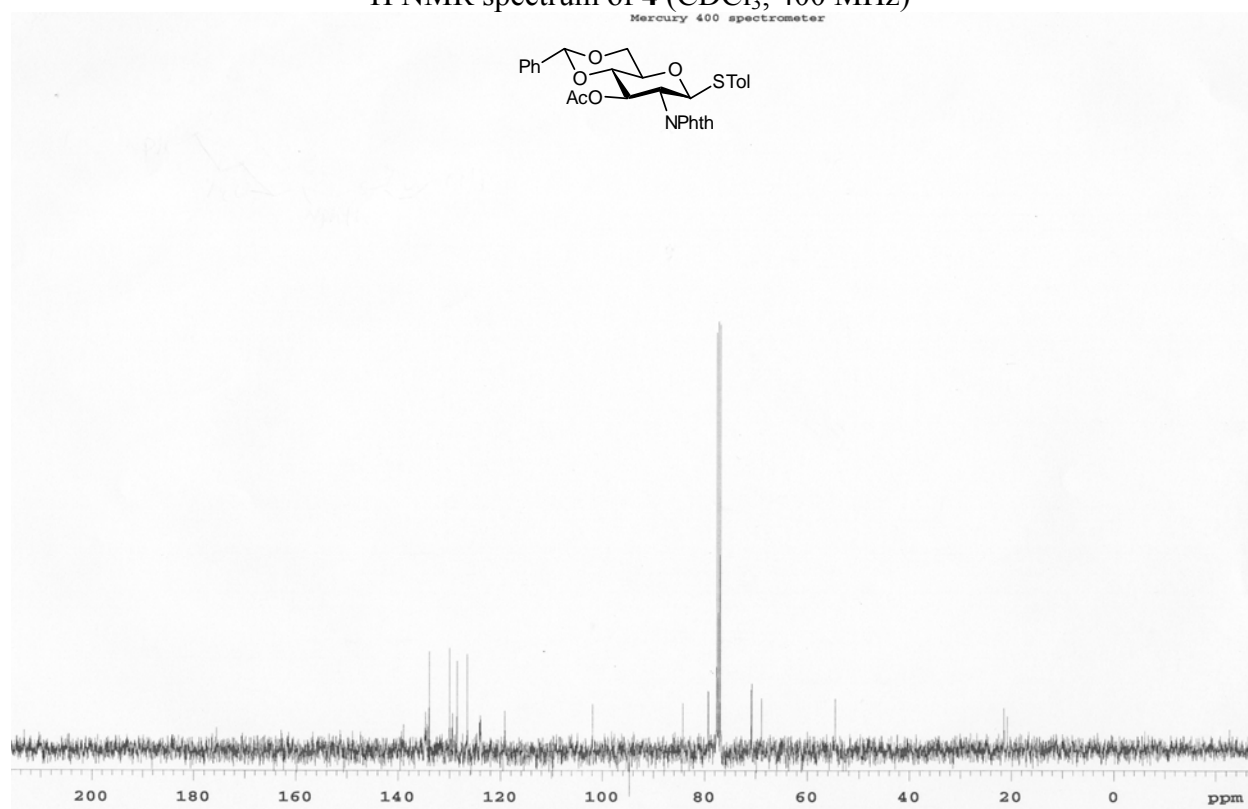

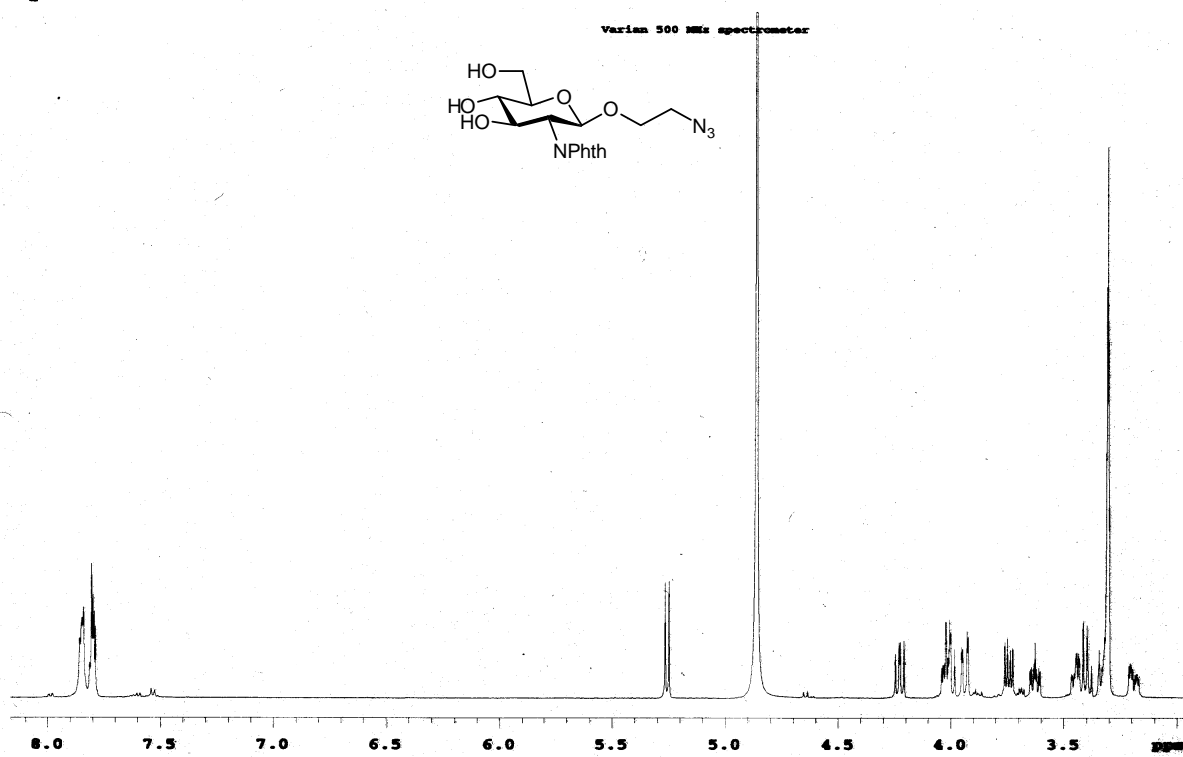

$^1\text{H}$  NMR spectrum of **20** ( $\text{CD}_3\text{OD}$ , 500 MHz)

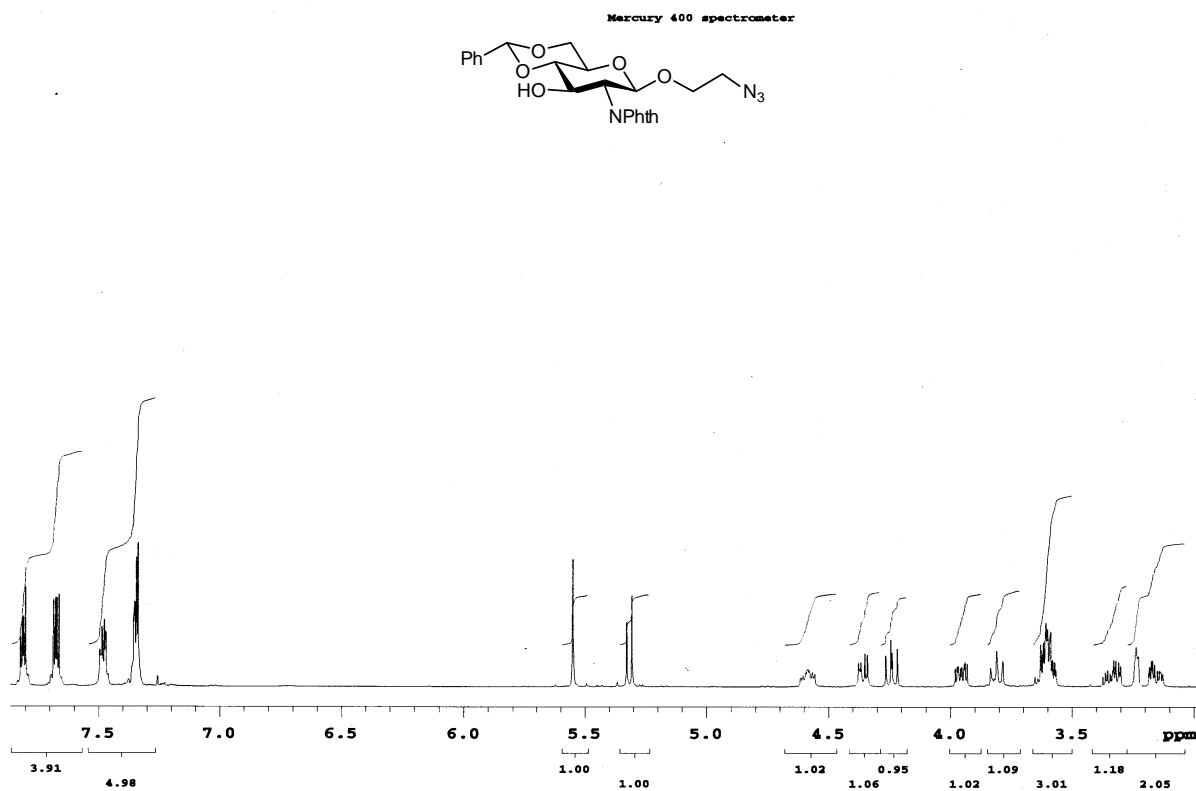

$^1\text{H}$  NMR spectrum of **21** ( $\text{CDCl}_3$ , 400 MHz)

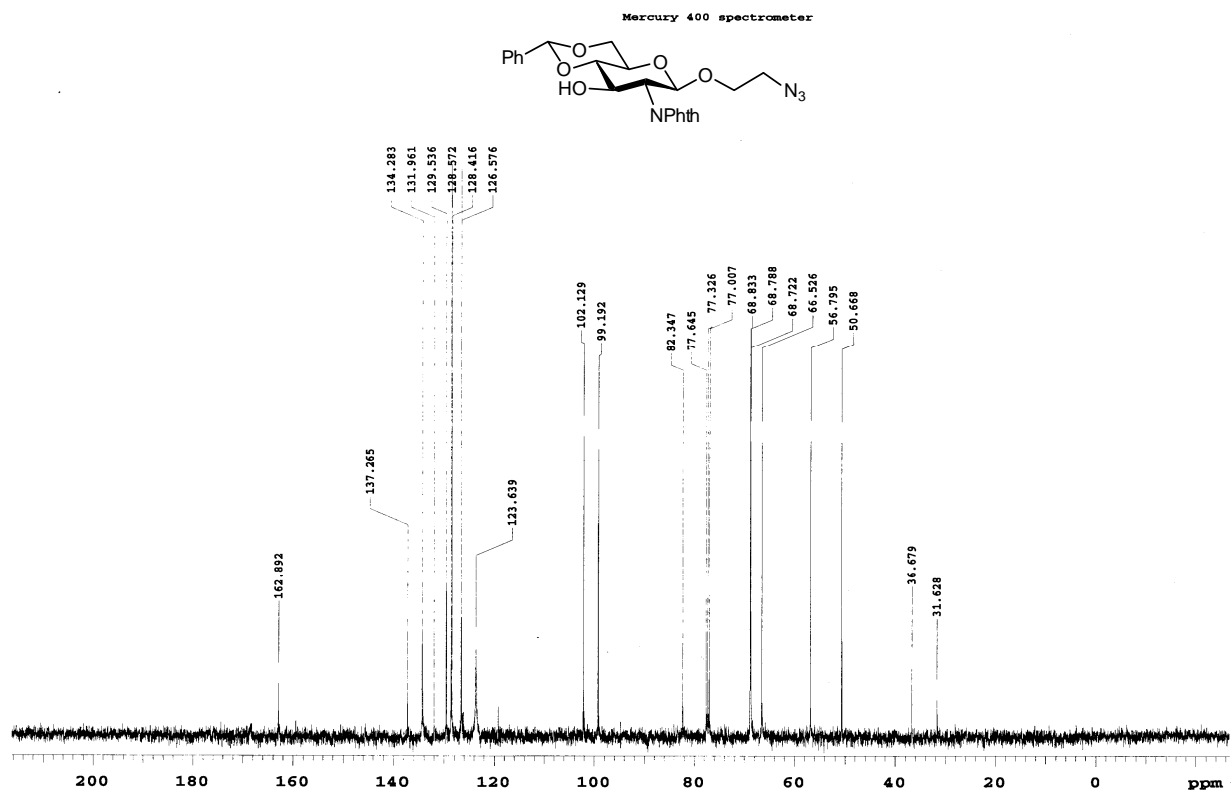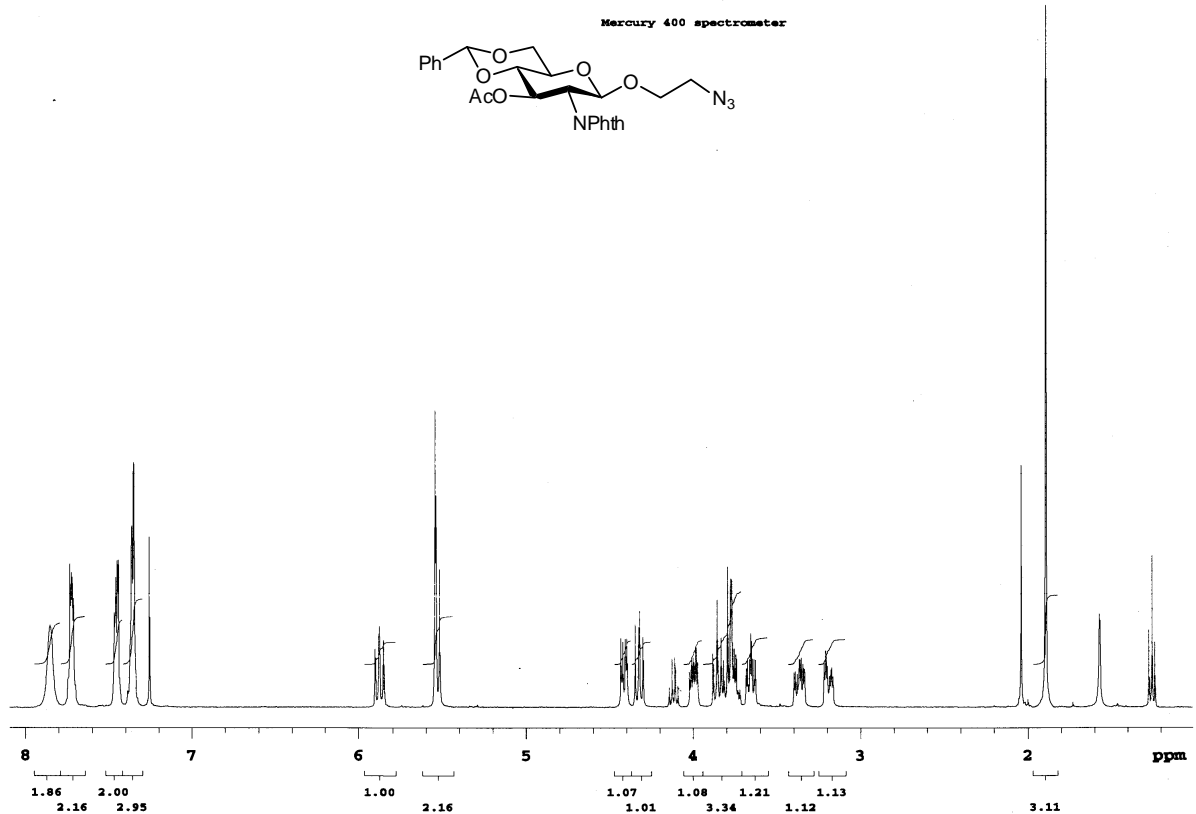

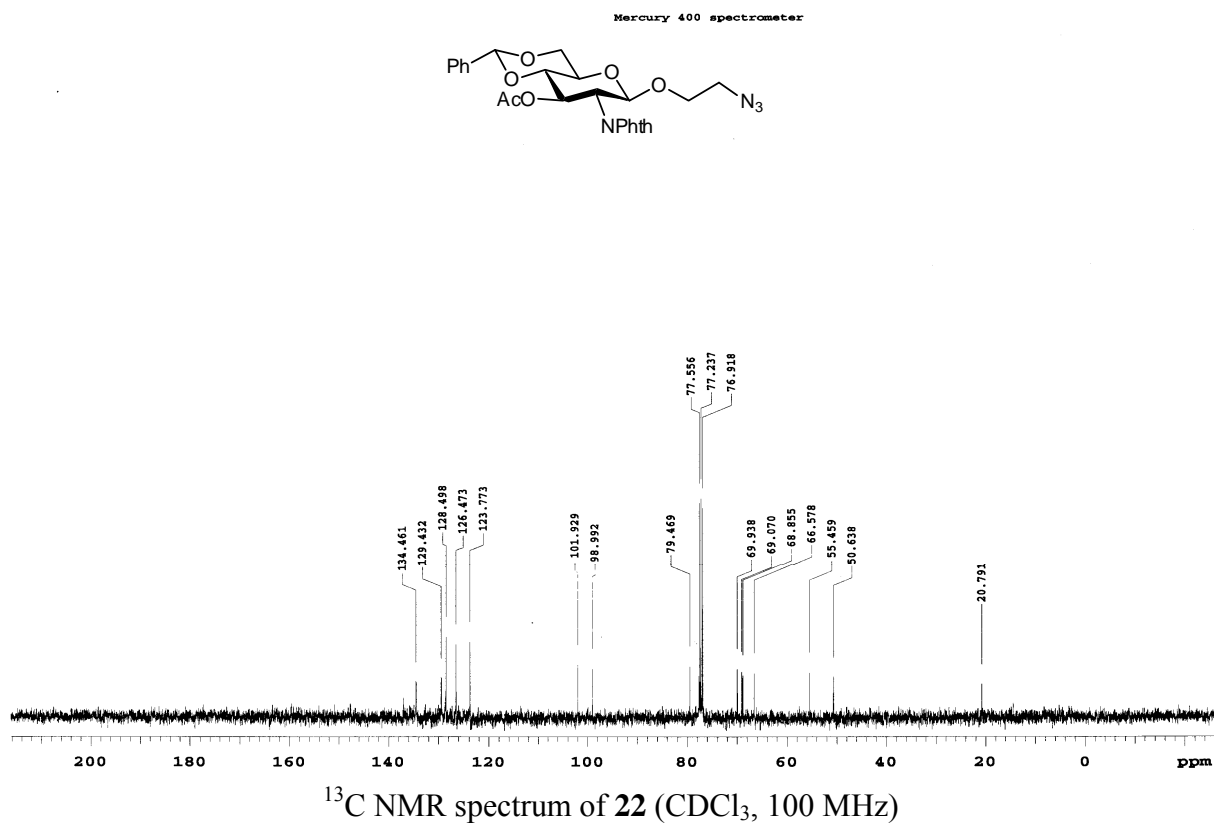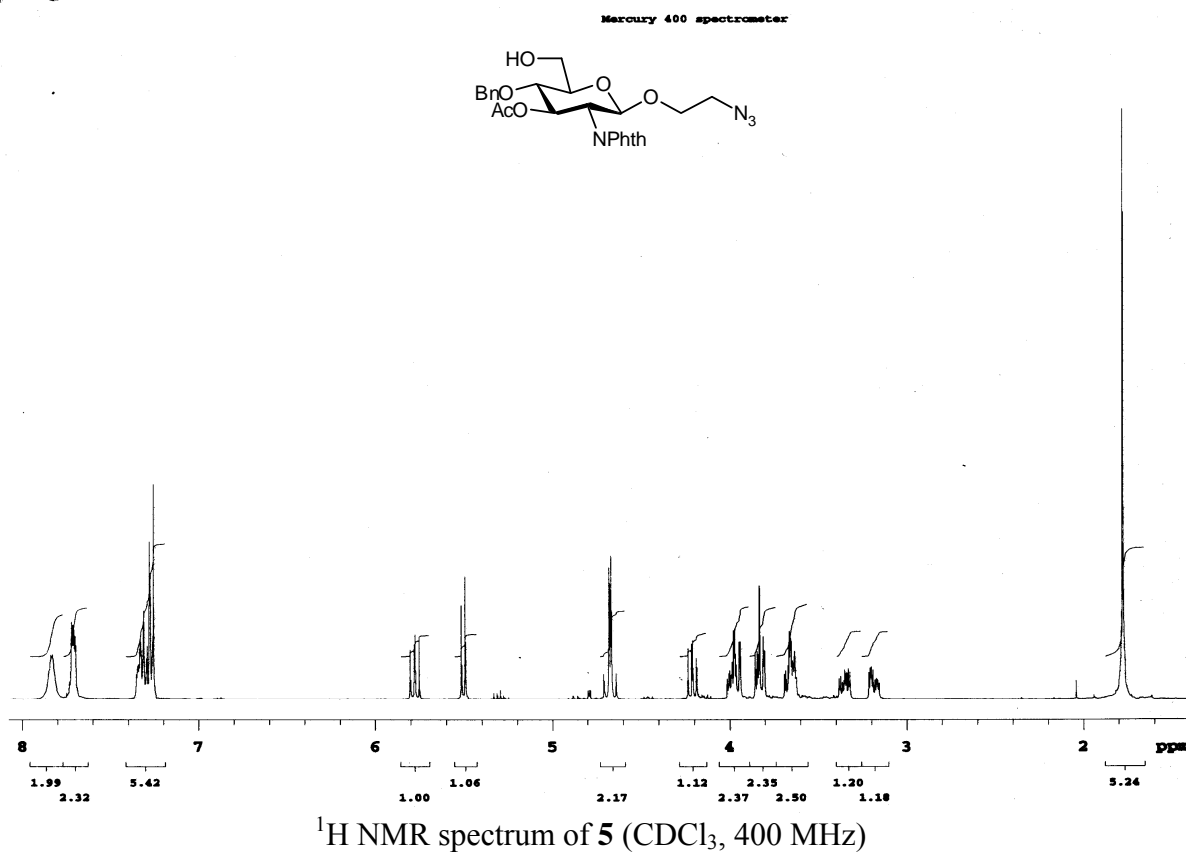

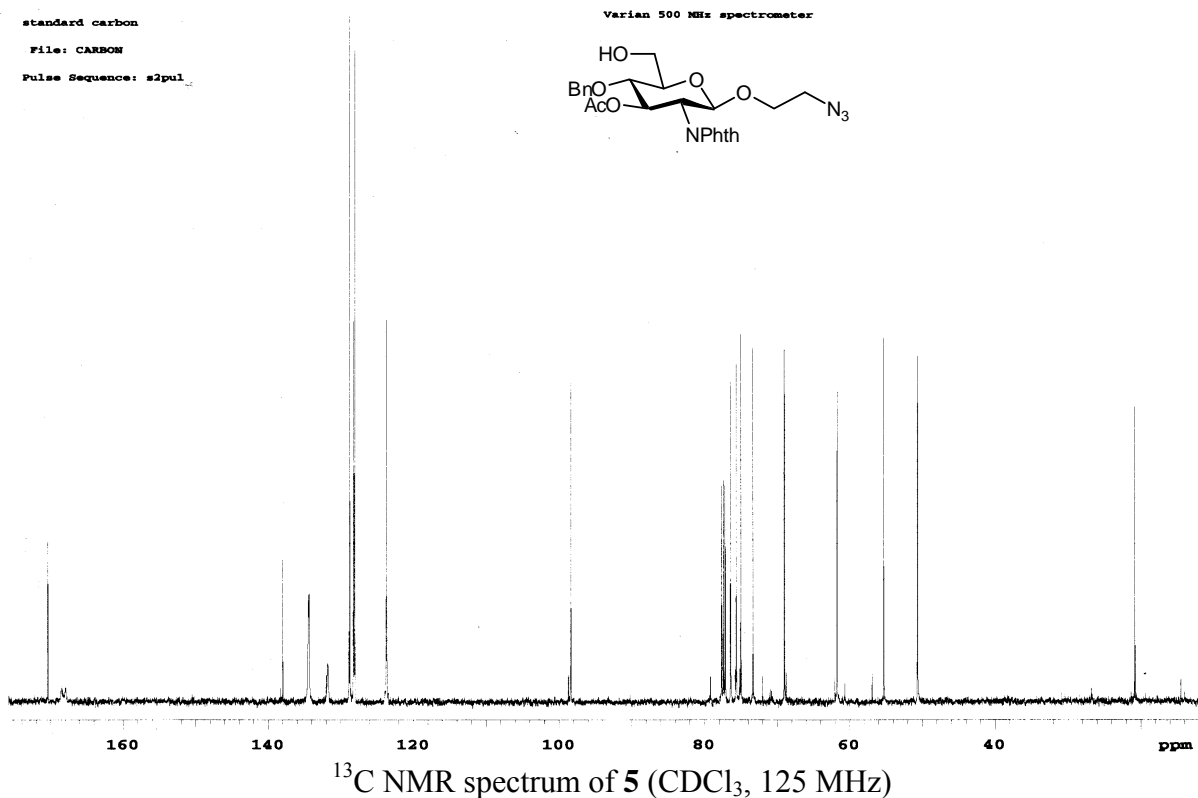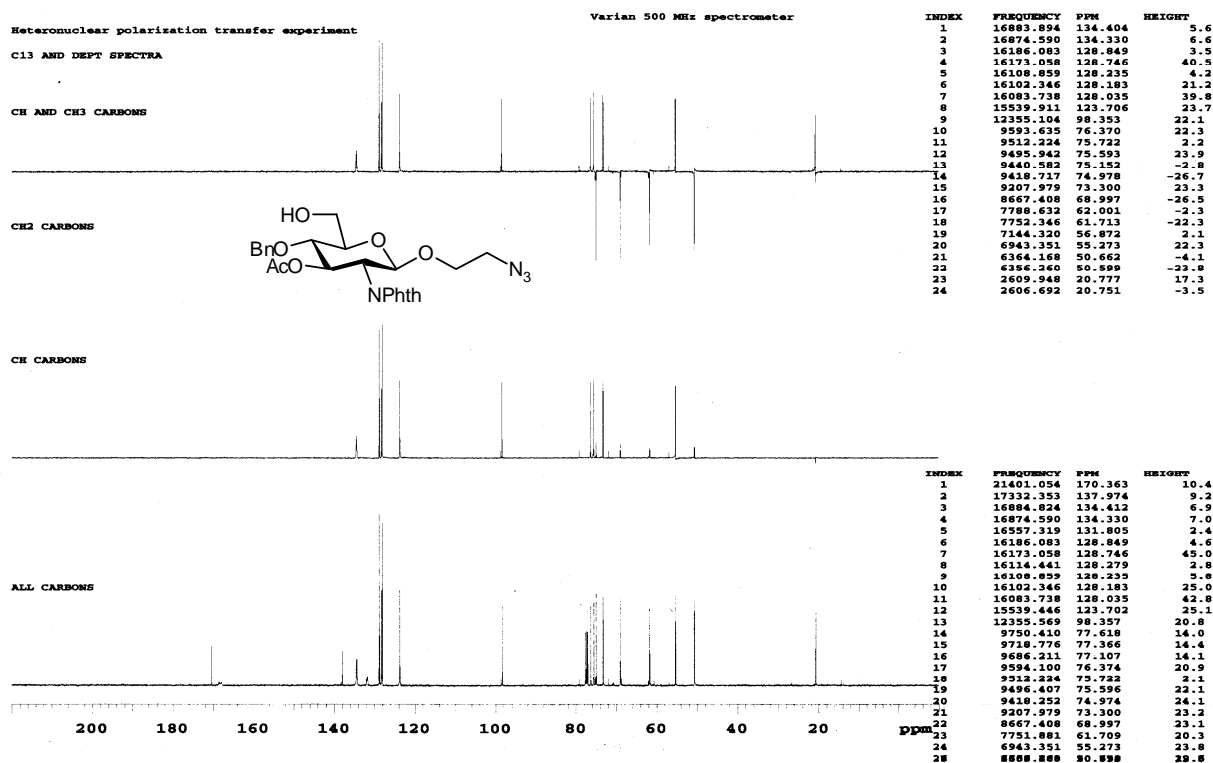

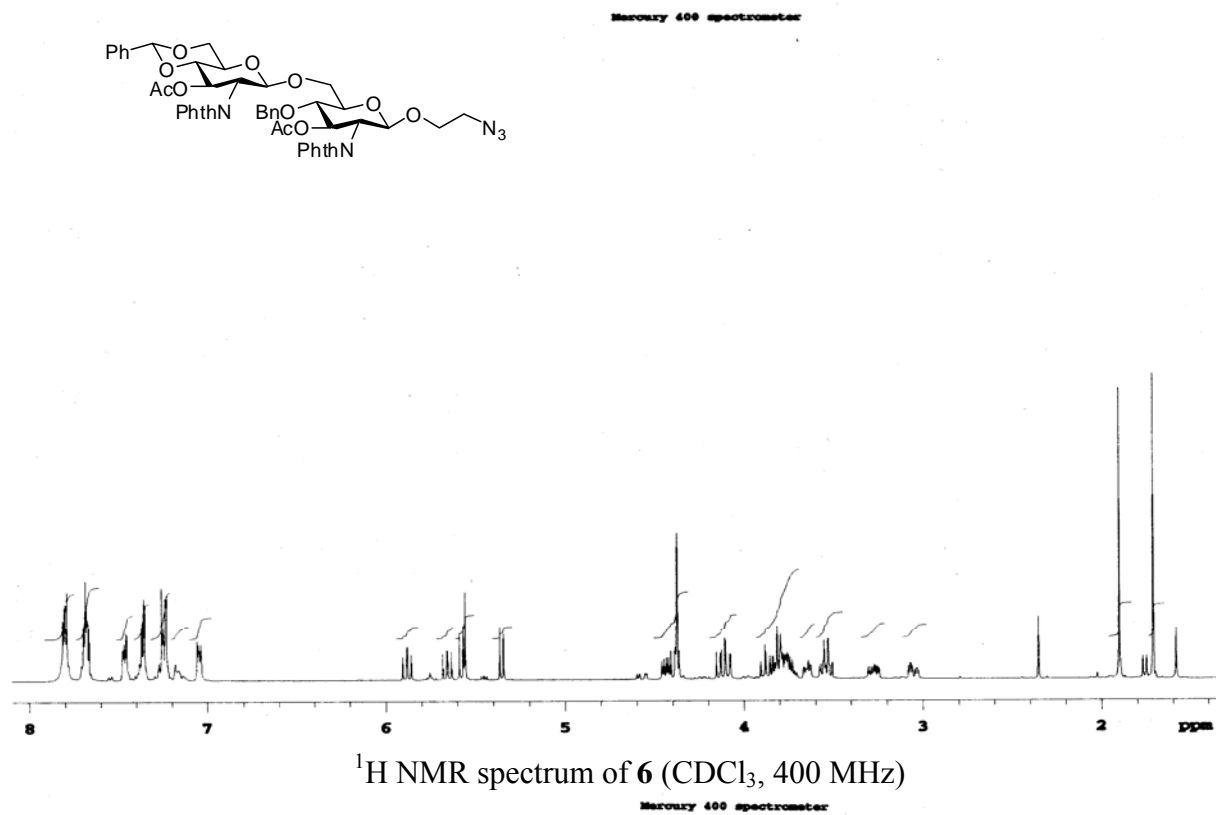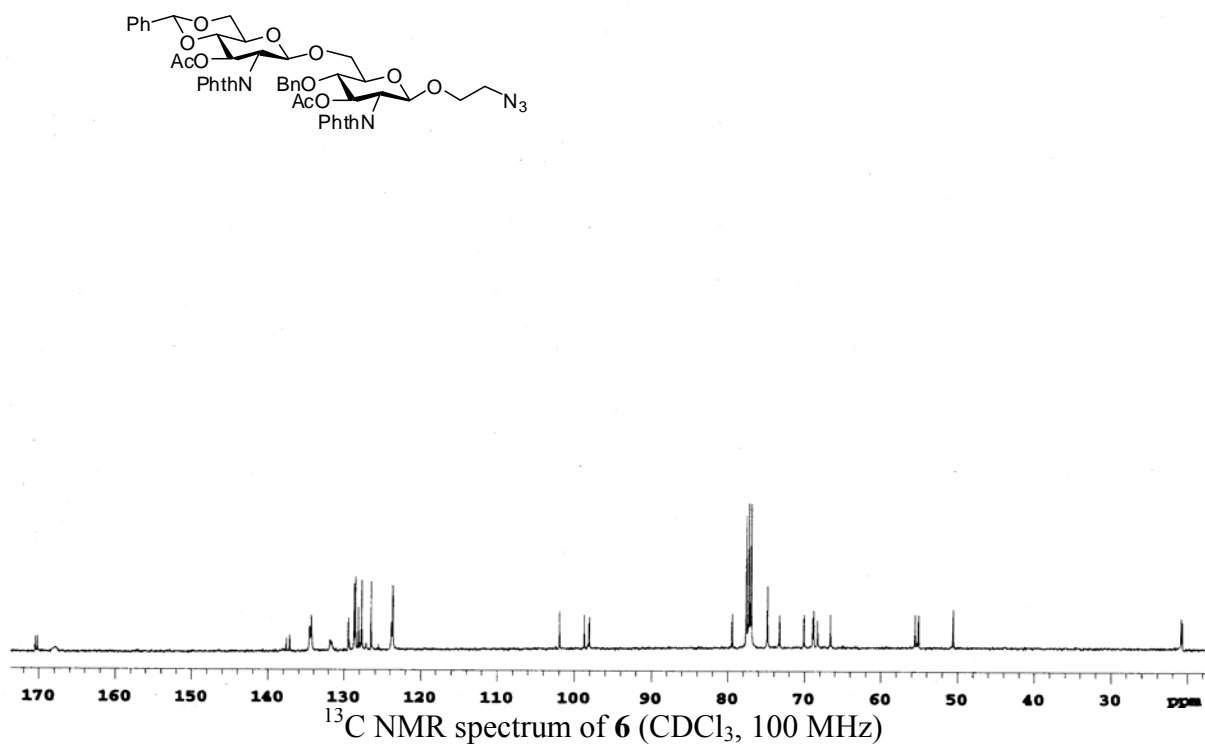

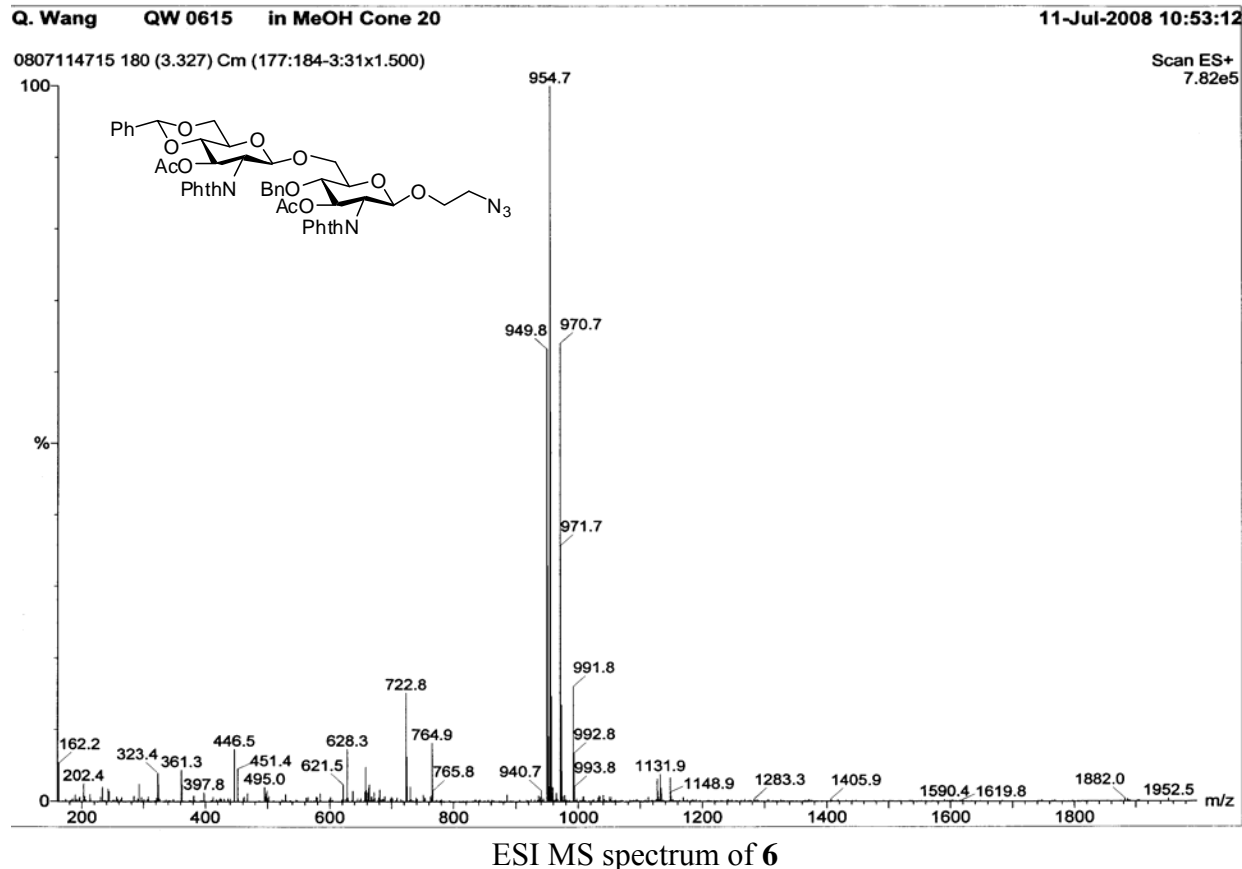

# Elemental Composition Report

Page 1

## Single Mass Analysis

Tolerance = 5.0 PPM / DBE: min = -1.5, max = 500.0

Element prediction: Off

Number of isotope peaks used for i-FIT = 3

Monoisotopic Mass, Even Electron Ions

637 formula(e) evaluated with 7 results within limits (up to 50 closest results for each mass)

Elements Used:

C: 0-50 H: 0-50 N: 0-6 O: 0-20 Na: 0-2

Q. Wang QW 0615

Shay 2008-07b.pro

2009\_0108\_0267 12 (0.246) Cm (10:12-1:5x2.000)

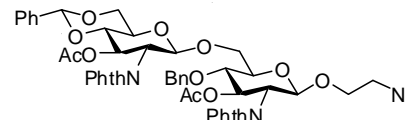

LCT Premier 08-Jan-2009 11:48:17  
1: TOF MS ES+  
2.81e+004

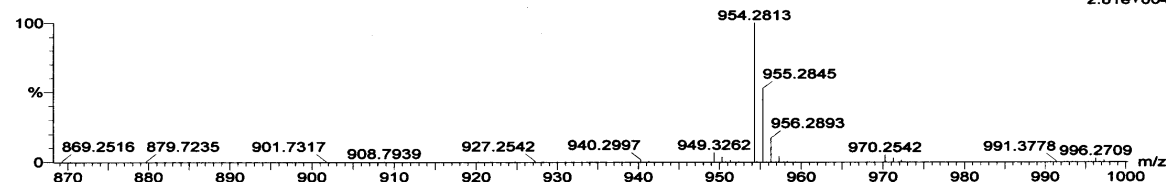

Minimum: -1.5  
Maximum: 500.0

| Mass     | Calc. Mass | mDa  | PPM  | DBE  | i-FIT | i-FIT (Norm) | Formula        |
|----------|------------|------|------|------|-------|--------------|----------------|
| 954.2813 | 954.2810   | 0.3  | 0.3  | 28.5 | 47.1  | 4.6          | C48 H45 N5 O15 |
|          |            |      |      |      |       |              | Na             |
|          | 954.2821   | -0.8 | -0.8 | 26.5 | 47.5  | 4.9          | C49 H48 N O19  |
|          | 954.2796   | 1.7  | 1.8  | 23.5 | 45.3  | 2.7          | C47 H49 N O19  |
|          |            |      |      |      |       |              | Na             |
|          | 954.2834   | -2.1 | -2.2 | 31.5 | 49.1  | 6.6          | C50 H44 N5 O15 |
|          | 954.2786   | 2.7  | 2.8  | 25.5 | 45.0  | 2.5          | C46 H46 N5 O15 |
|          |            |      |      |      |       |              | Na2            |
|          | 954.2845   | -3.2 | -3.4 | 16.5 | 49.6  | 7.1          | C39 H50 N5 O20 |
|          |            |      |      |      |       |              | Na2            |
|          | 954.2772   | 4.1  | 4.3  | 20.5 | 42.7  | 0.2          | C45 H50 N O19  |
|          |            |      |      |      |       |              | Na2            |

HR ESI MS spectrum of 6

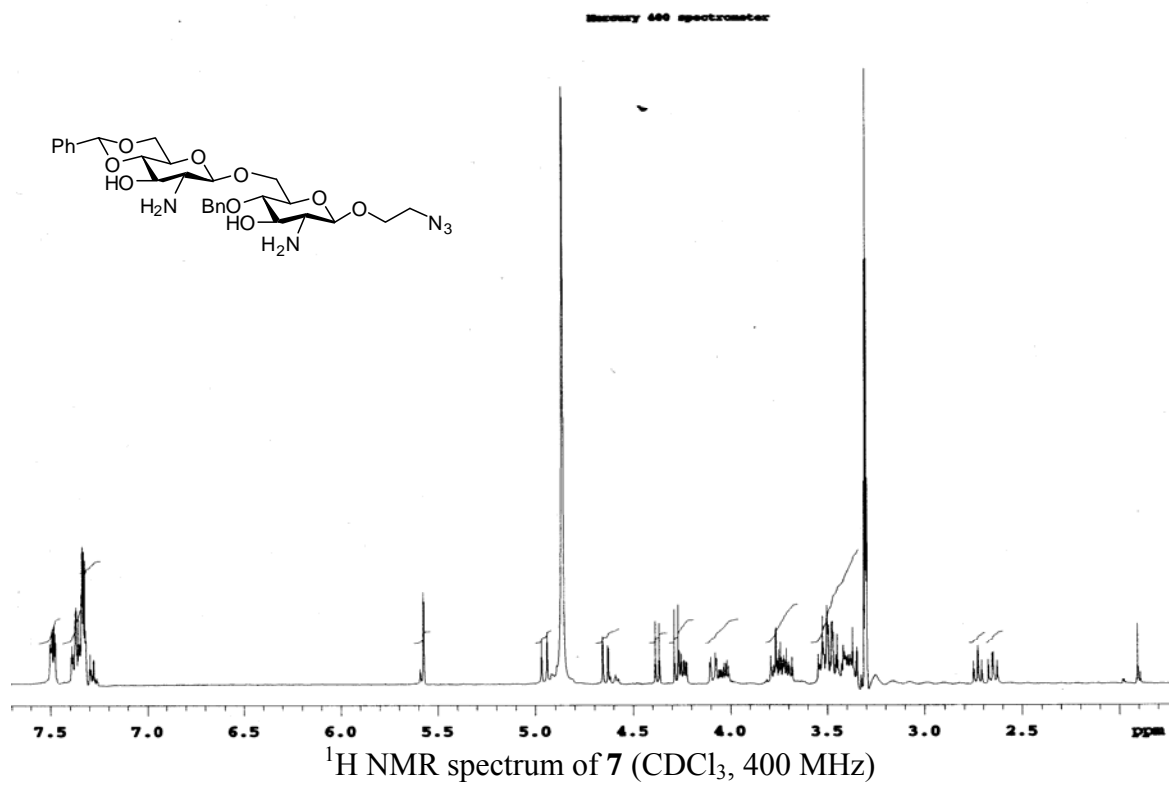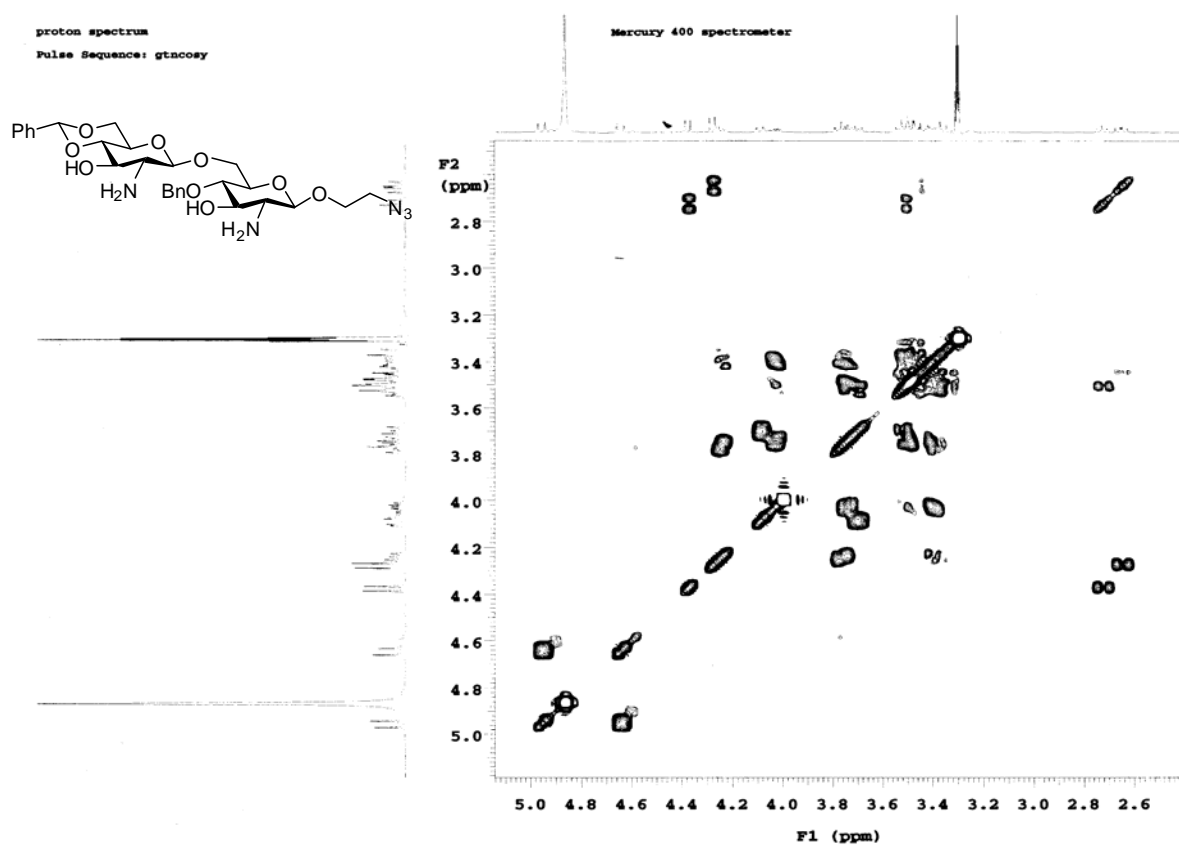



Mercury 400 spectrometer

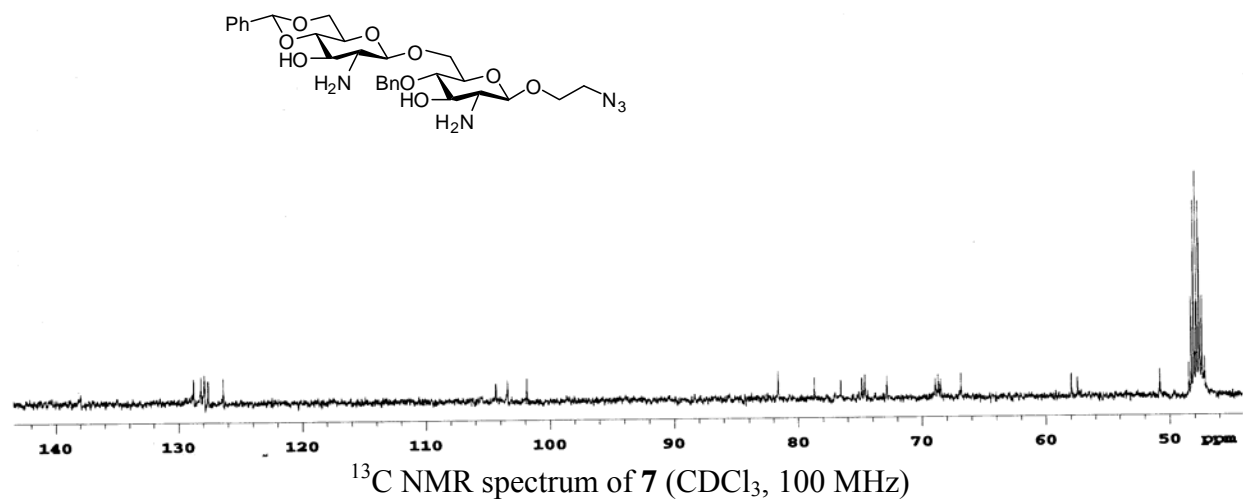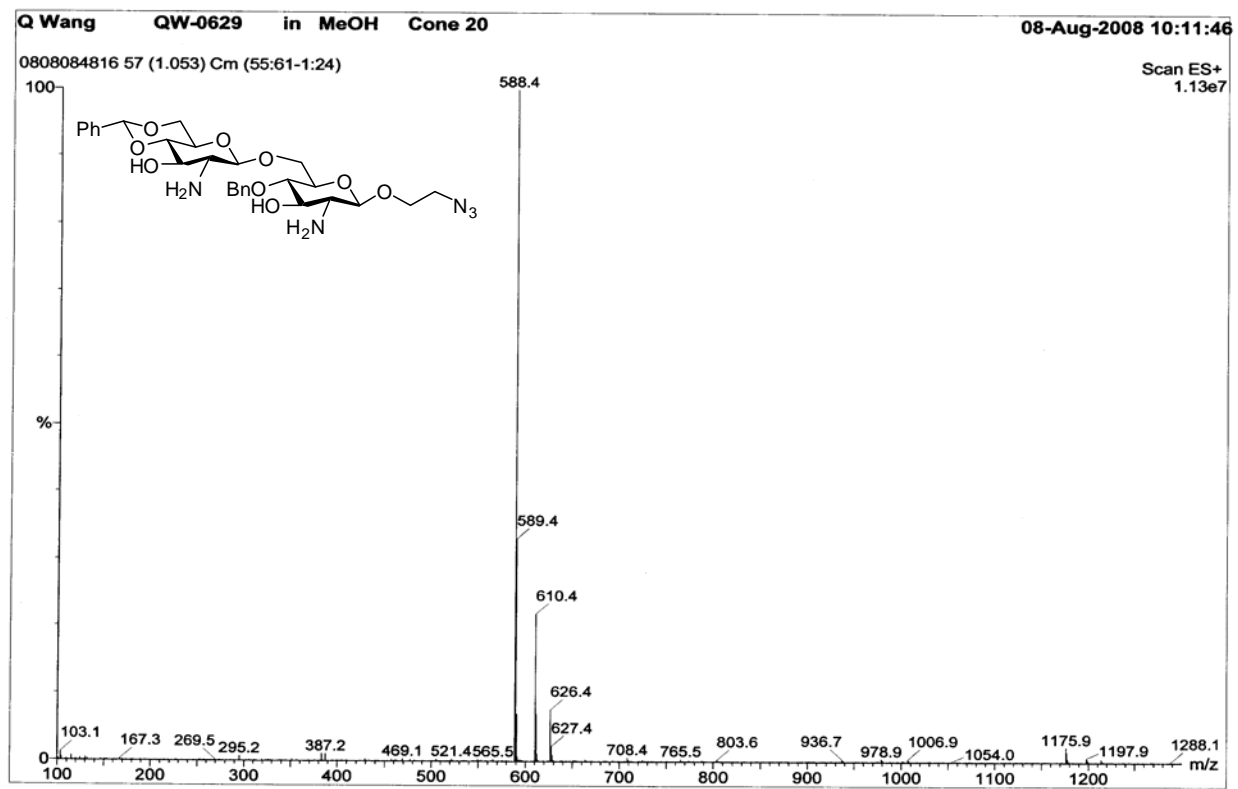

# Elemental Composition Report

Page 1

## Single Mass Analysis

Tolerance = 5.0 PPM / DBE: min = -1.5, max = 60.0

Element prediction: Off

Number of isotope peaks used for i-FIT = 3

Monoisotopic Mass, Even Electron Ions

1070 formula(e) evaluated with 7 results within limits (up to 50 best isotopic matches for each mass)

Elements Used:

C: 0-113 H: 0-116 N: 0-5 O: 0-13 <sup>23</sup>Na: 0-1

guo- Qwang QW0629 mw587 LCT0109 10pg/ul meoh 1ul 1ul stk

Shay 2008-07b.pro

2008\_0822\_0109\_26 12 (0.246) Cm (9:12-33:45x2.000)

LCT Premier 22-Aug-2008 16:33:32

1: TOF MS ES+

4.58e+003

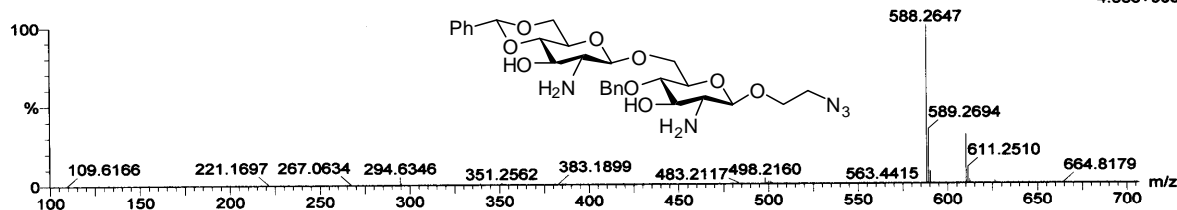

| Minimum: |            |      |      | -1.5 |       |              |                  |     |    |                  |
|----------|------------|------|------|------|-------|--------------|------------------|-----|----|------------------|
| Maximum: |            | 8.0  | 5.0  | 60.0 |       |              |                  |     |    |                  |
| Mass     | Calc. Mass | mDa  | PPM  | DBE  | i-FIT | i-FIT (Norm) | Formula          |     |    |                  |
| 588.2647 | 588.2670   | -2.3 | -3.9 | 12.5 | 52.4  | 0.8          | C28              | H38 | N5 | O9               |
|          | 588.2656   | -0.9 | -1.5 | 7.5  | 52.8  | 1.2          | C27              | H42 | N  | O13              |
|          | 588.2645   | 0.2  | 0.3  | 9.5  | 53.1  | 1.5          | C26              | H39 | N5 | O9               |
|          |            |      |      |      |       |              | <sup>23</sup> Na |     |    |                  |
|          | 588.2632   | 1.5  | 2.5  | 4.5  | 56.1  | 4.5          | C25              | H43 | N  | O13              |
|          |            |      |      |      |       |              | <sup>23</sup> Na |     |    |                  |
|          | 588.2651   | -0.4 | -0.7 | 25.5 | 59.7  | 8.1          | C40              | H34 | N3 | O2               |
|          | 588.2627   | 2.0  | 3.4  | 22.5 | 60.2  | 8.6          | C38              | H35 | N3 | O2               |
|          |            |      |      |      |       |              | <sup>23</sup> Na |     |    |                  |
|          | 588.2667   | -2.0 | -3.4 | 26.5 | 61.3  | 9.7          | C43              | H35 | N  | <sup>23</sup> Na |

## HR ESI MS spectrum of 7

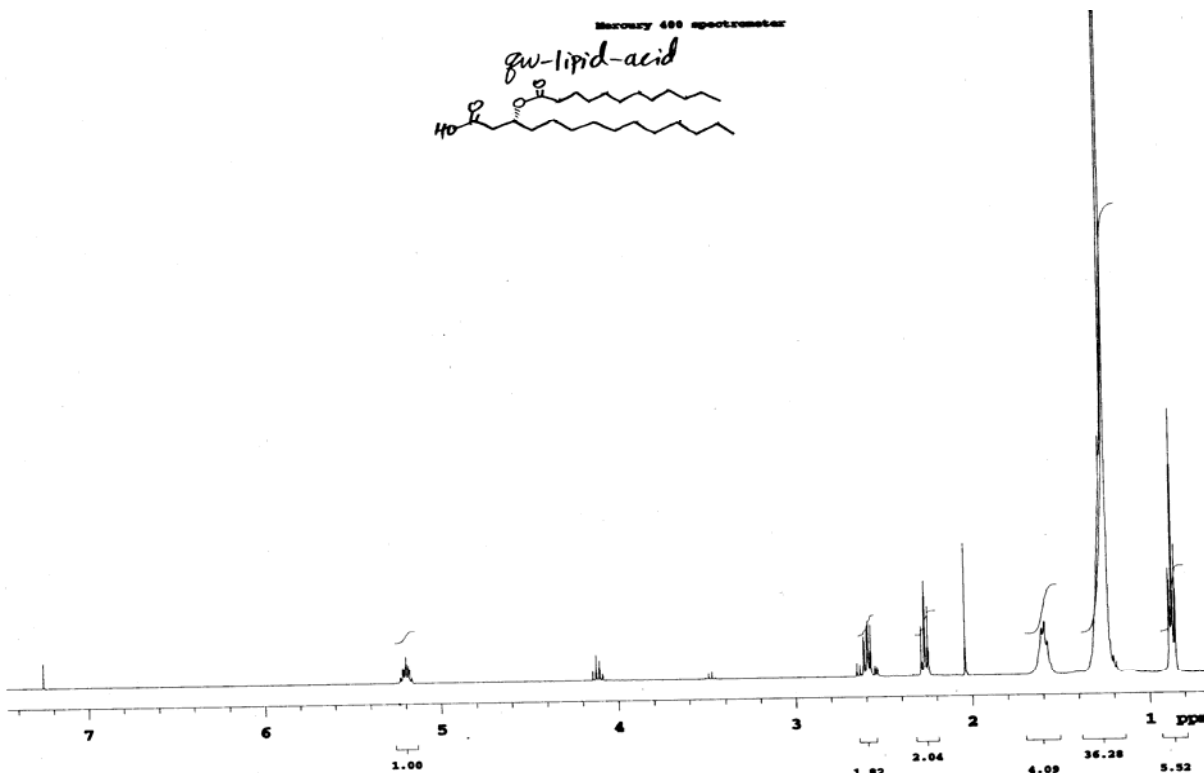

<sup>1</sup>H NMR spectrum of 8 (CDCl<sub>3</sub>, 400 MHz)

Mercury 400 spectrometer

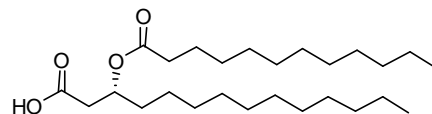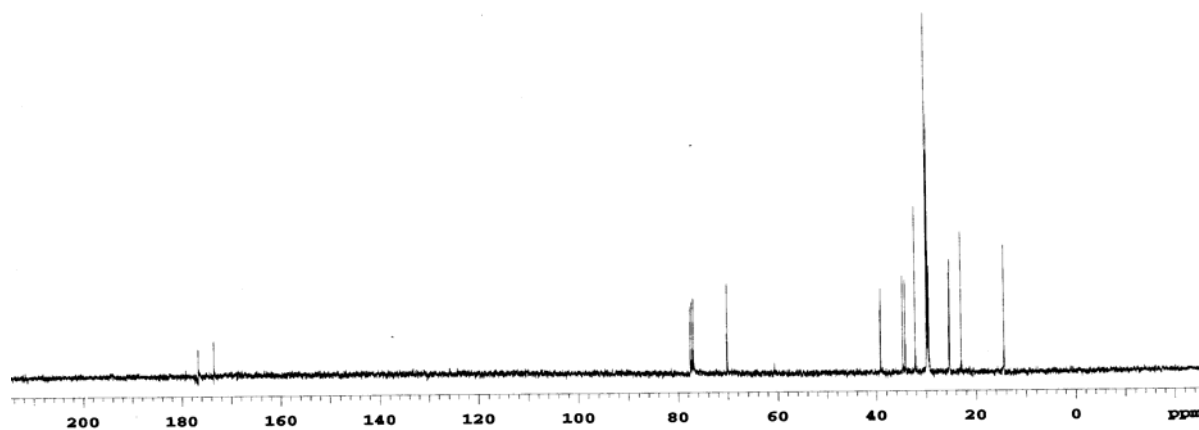

$^{13}\text{C}$  NMR spectrum of **8** ( $\text{CDCl}_3$ , 100 MHz)

Mercury 400 spectrometer

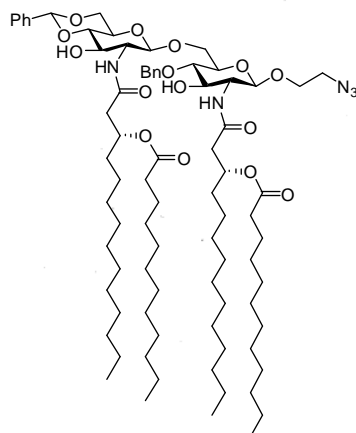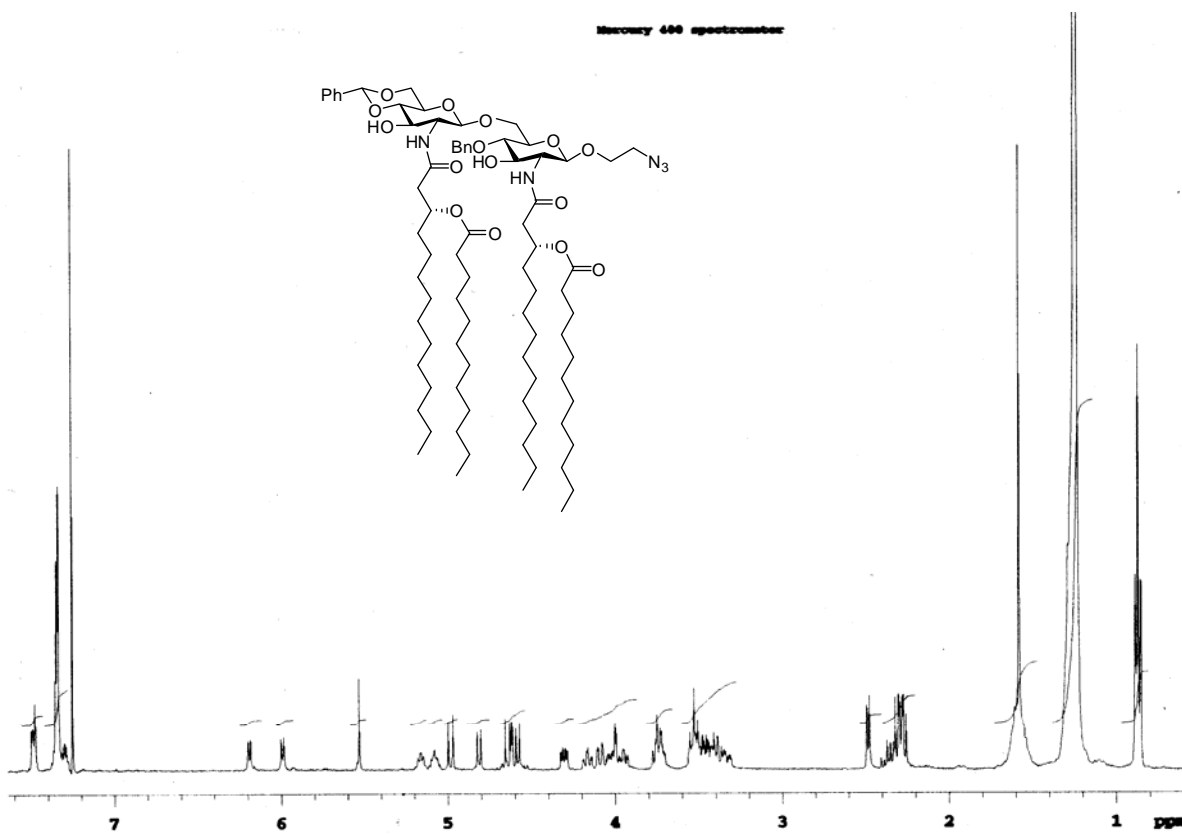

$^1\text{H}$  NMR spectrum of **9** ( $\text{CDCl}_3$ , 400 MHz)

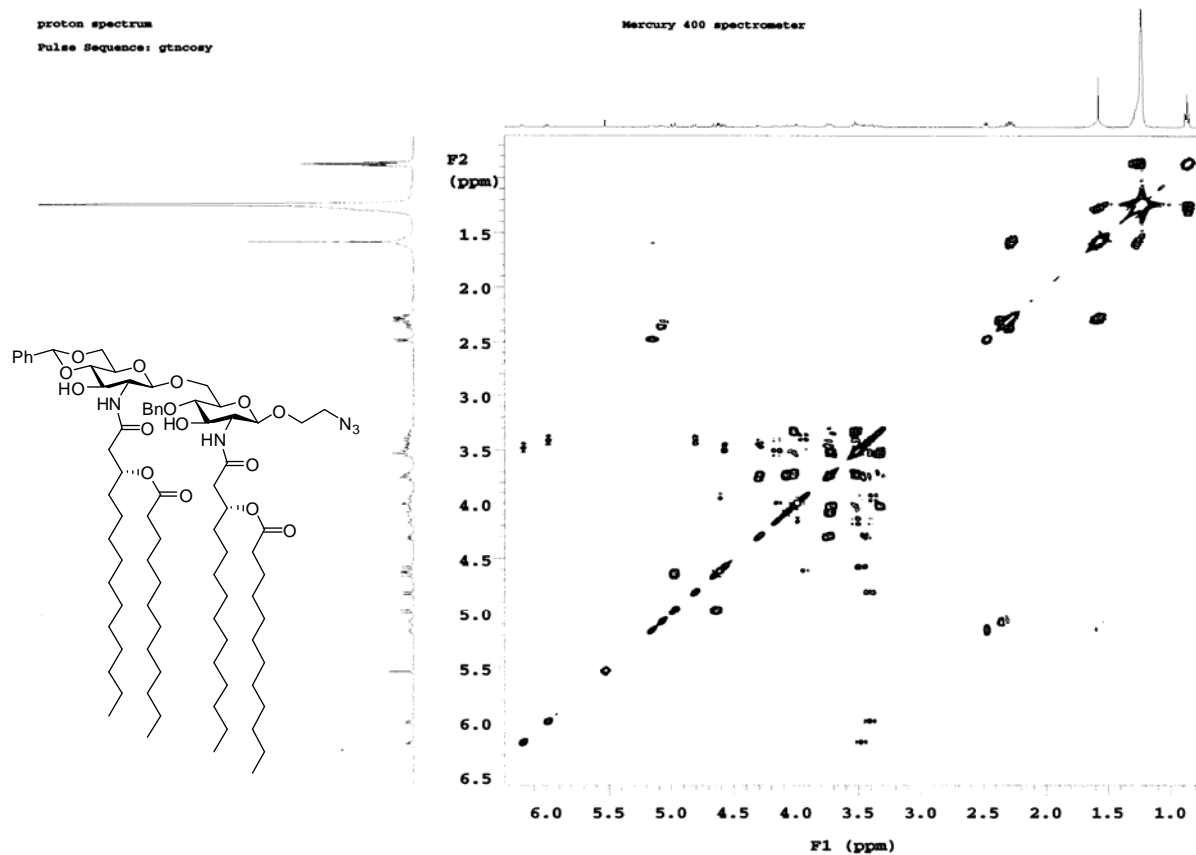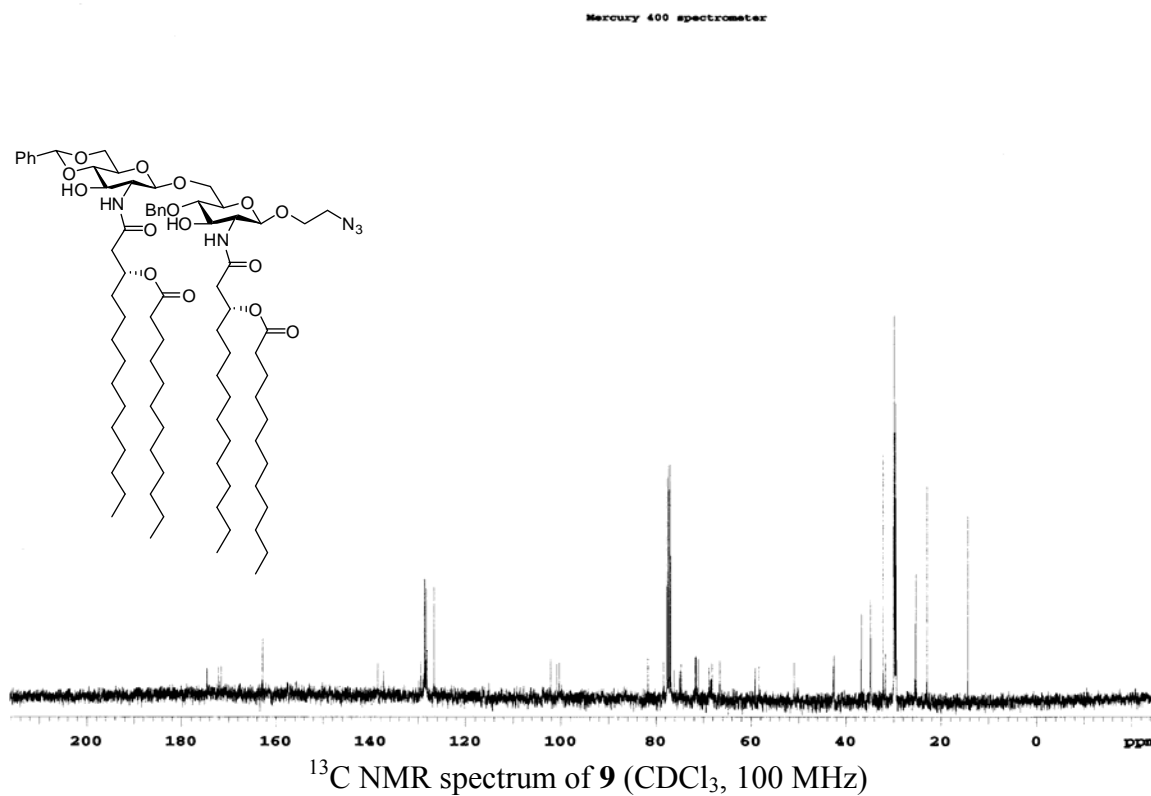

## Elemental Composition Report

Page 1

### Single Mass Analysis

Tolerance = 5.0 PPM / DBE: min = -1.5, max = 60.0

Element prediction: Off

Number of isotope peaks used for i-FIT = 3

Monoisotopic Mass, Even Electron Ions

199 formula(e) evaluated with 1 results within limits (up to 50 best isotopic matches for each mass)

Elements Used:

C: 0-80 H: 0-200 N: 0-5 O: 0-15 <sup>23</sup>Na: 0-1

guo-Qwang QW0632 mw1403.9 LCT0110 10pg/ul meoh 1ul 1ul stk

Shay 2008-07b.pro

2008\_0822\_0110\_28 14 (0.300) Cm (10:14-1:6x2.000)

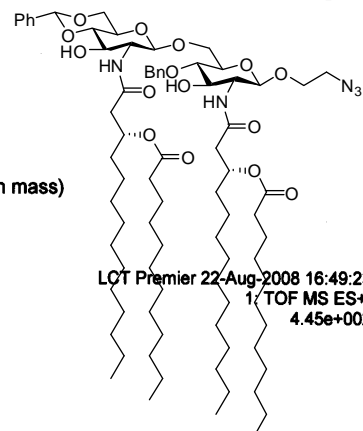

LCT Premier 22-Aug-2008 16:49:23  
1/ TOF MS ES+  
4.45e+002

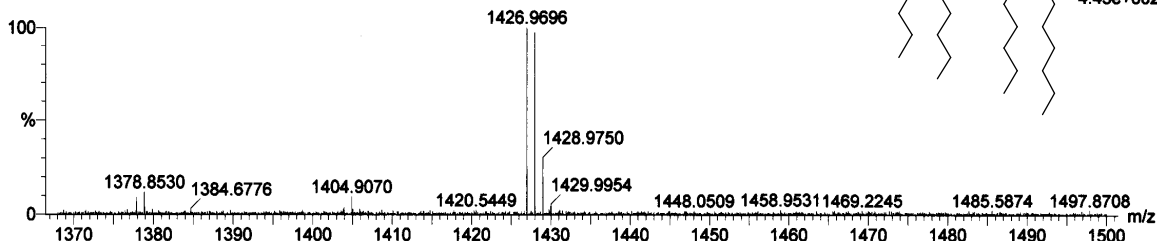

| Minimum:  |            |     |      | -1.5 |       |              |                                     |
|-----------|------------|-----|------|------|-------|--------------|-------------------------------------|
| Maximum:  | 8.0        | 5.0 | 60.0 |      |       |              |                                     |
| Mass      | Calc. Mass | mDa | PPM  | DBE  | i-FIT | i-FIT (Norm) | Formula                             |
| 1426.9696 | 1426.9696  | 0.0 | 0.0  | 16.5 | 94.1  | 0.0          | C80 H133 N5 O15<br><sup>23</sup> Na |

### HR ESI MS spectrum of 9

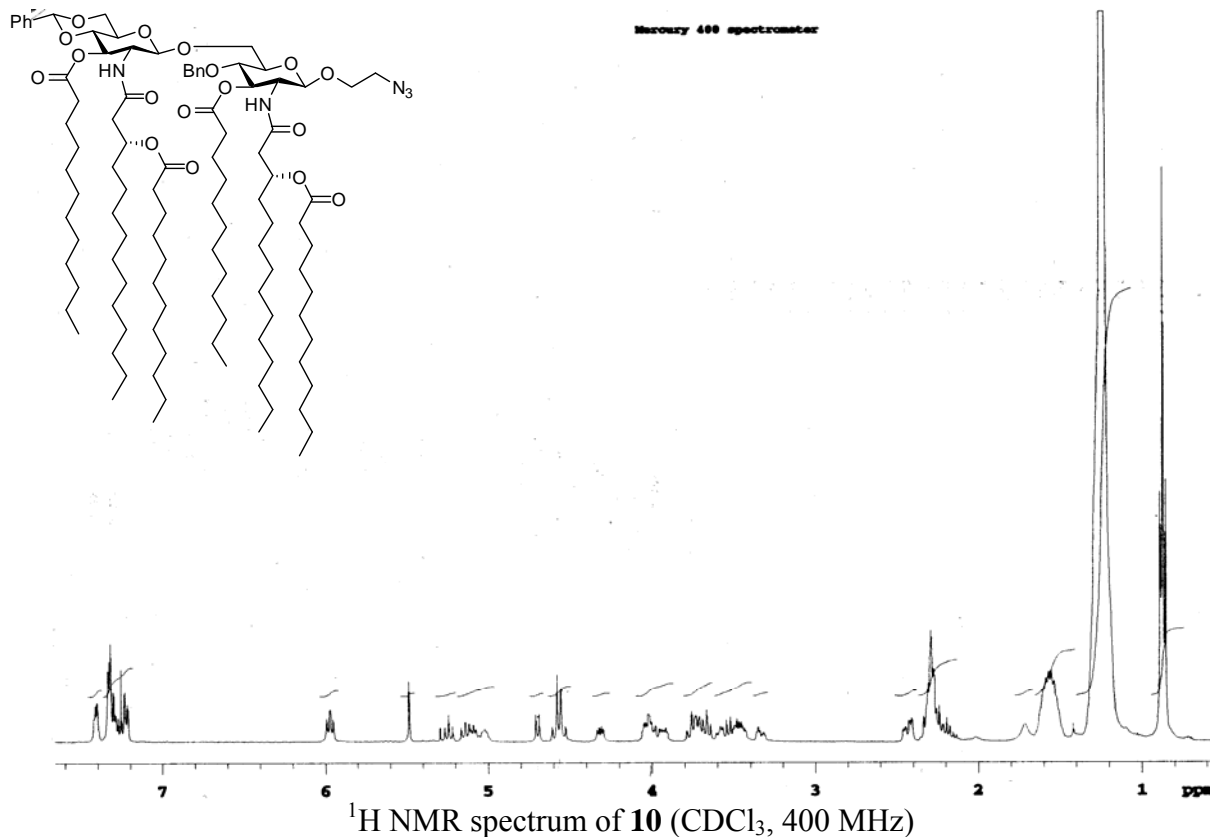

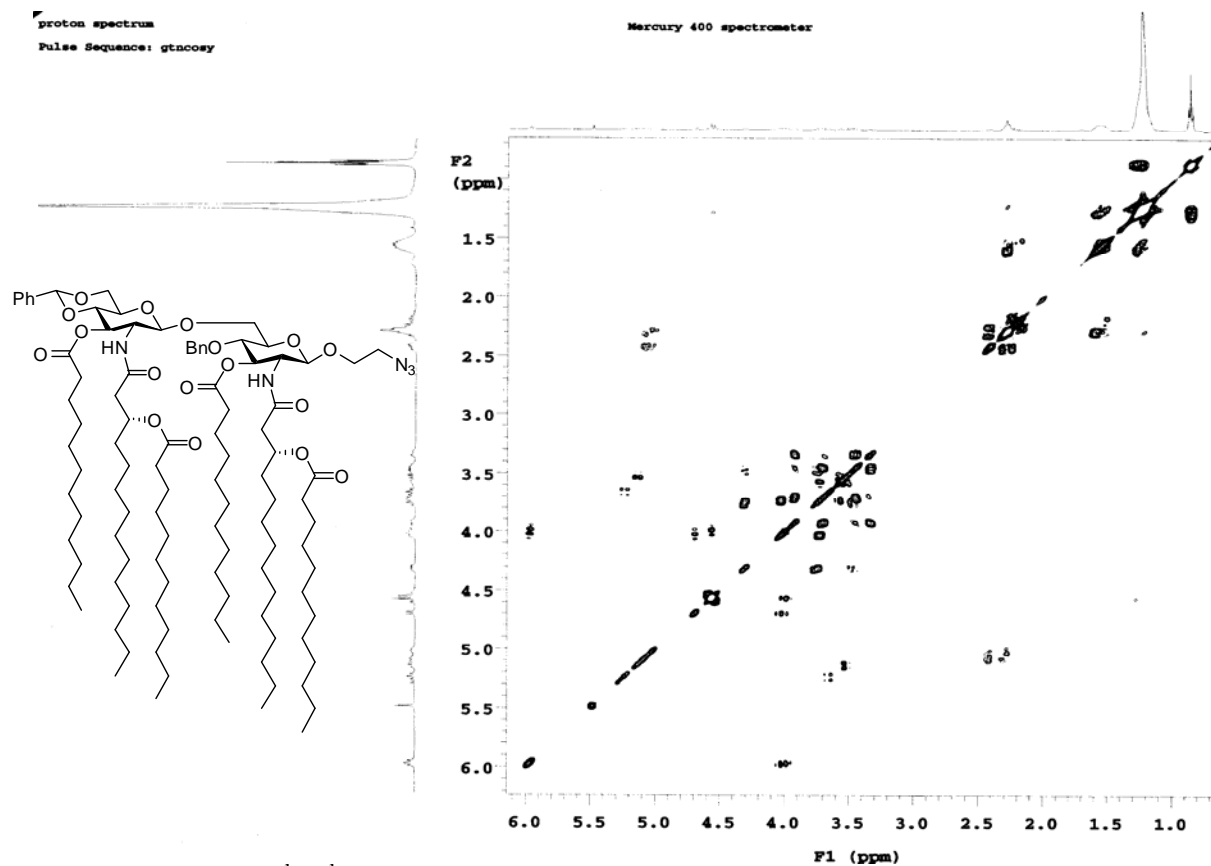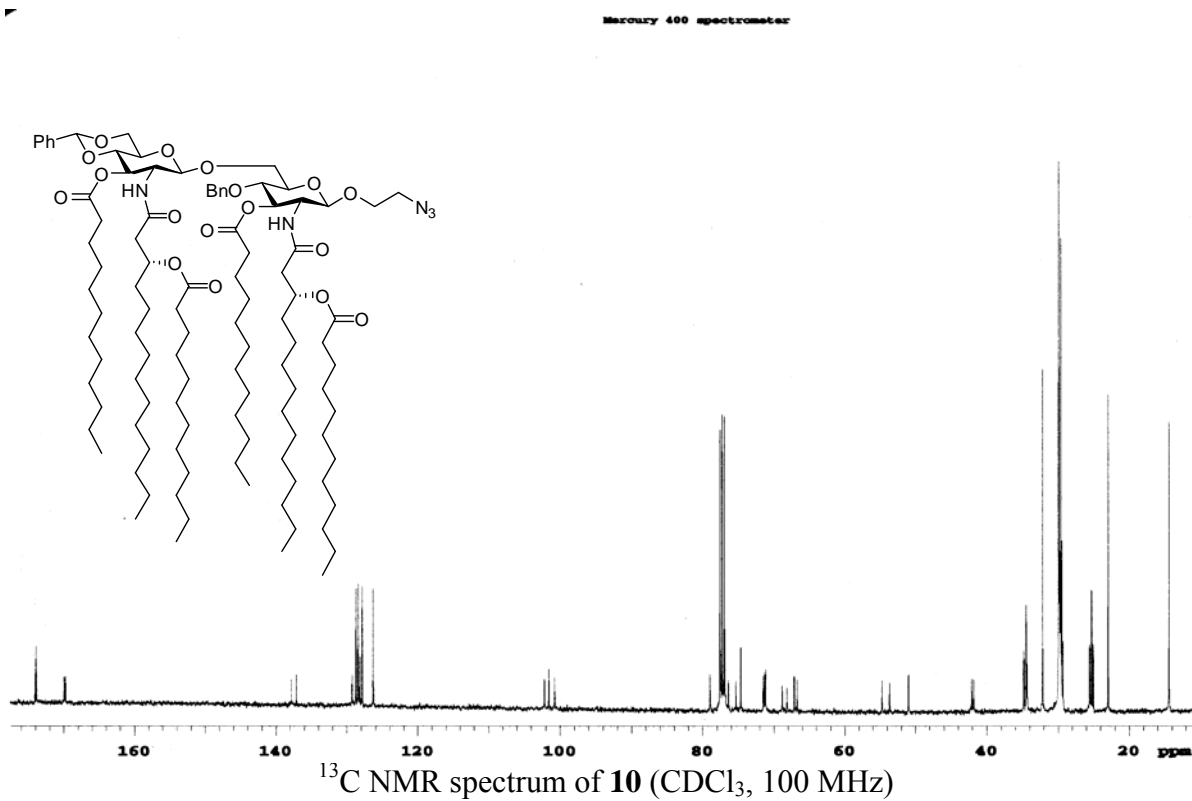

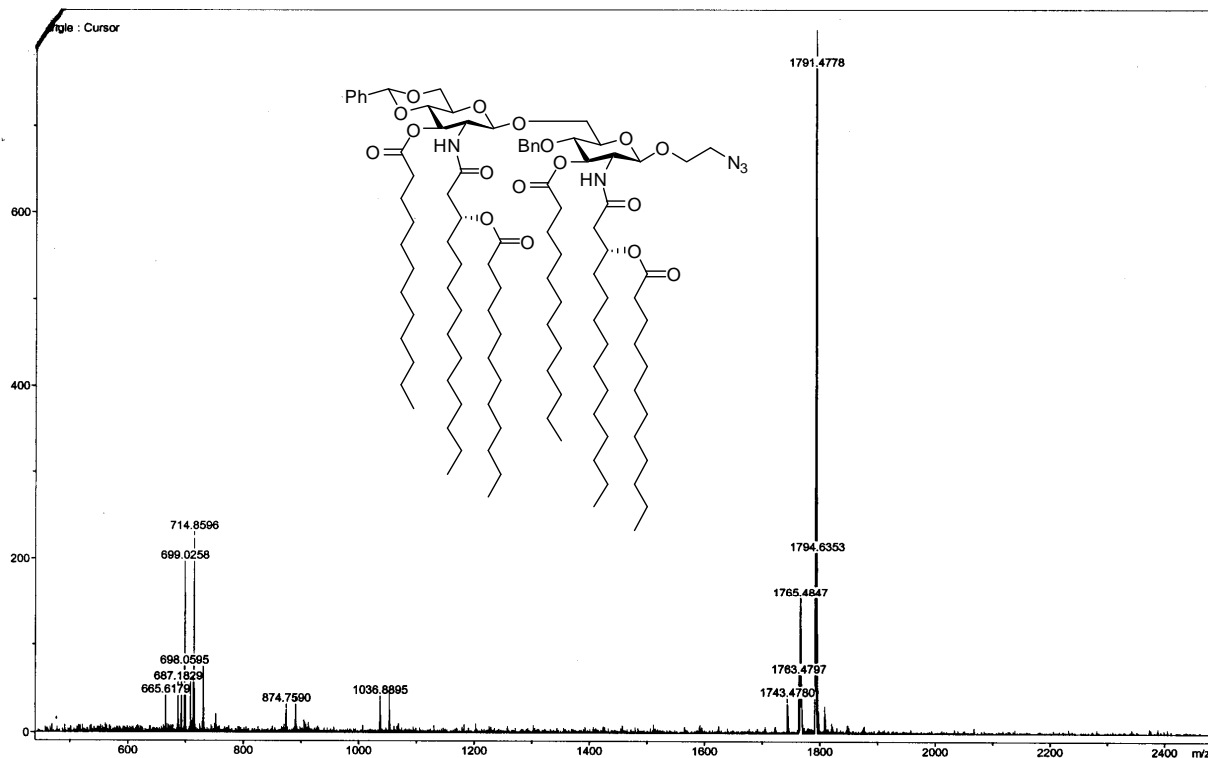

MALTI-TOF MS spectrum of **10**

# Elemental Composition Report

## Single Mass Analysis

Tolerance = 5.0 PPM / DBE: min = -1.5, max = 50.0

Element prediction: Off

Number of isotope peaks used for i-FIT = 3

Monoisotopic Mass, Even Electron Ions

426 formula(e) evaluated with 4 results within limits (up to 50 best isotopic matches for each mass)

Elements Used:

C: 0-110 H: 0-500 N: 0-5 O: 0-17 <sup>23</sup>Na: 0-1

26-Sep-2008 10:08:54 Guo- quanli wang qwo640 mw1768.3 LCT0144 5uL meoh 4x stk

Shay 2008-07b.pro

2008\_0926\_0144\_02 16 (0.317) Cm (13:21-(3:8+38:43)x3.000)

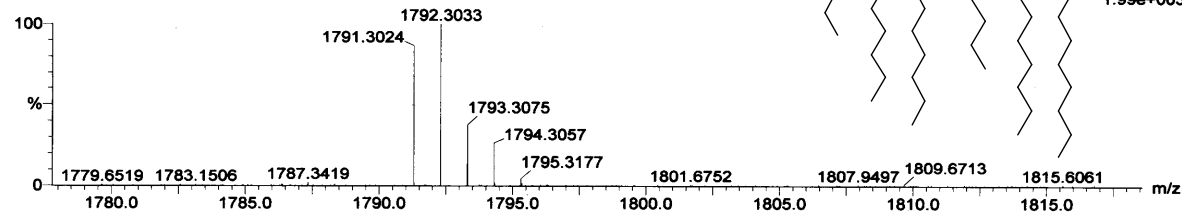

Minimum:

Maximum:

5.0 5.0 -1.5  
50.0

| Mass      | Calc. Mass | mDa  | PPM  | DBE  | i-FIT | i-FIT (Norm) | Formula                              |
|-----------|------------|------|------|------|-------|--------------|--------------------------------------|
| 1791.3024 | 1791.3037  | -1.3 | -0.7 | 18.5 | 63.2  | 0.6          | C104 H177 N5 O17<br><sup>23</sup> Na |
|           | 1791.3061  | -3.7 | -2.1 | 21.5 | 64.2  | 1.6          | C106 H176 N5 O17                     |
|           | 1791.2965  | 5.9  | 3.3  | 22.5 | 64.3  | 1.7          | C110 H177 N O16<br><sup>23</sup> Na  |
|           | 1791.3077  | -5.3 | -3.0 | 22.5 | 65.2  | 2.6          | C109 H177 N3 O15<br><sup>23</sup> Na |

HR ESI MS spectrum of **10**

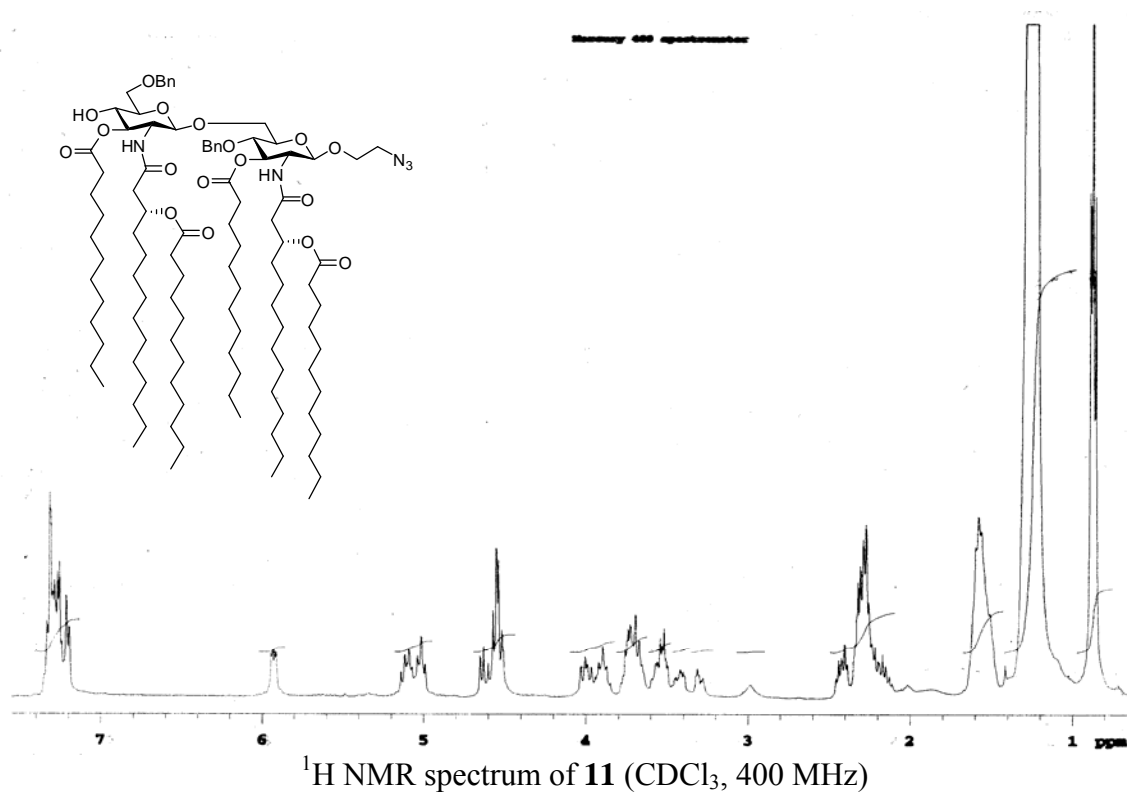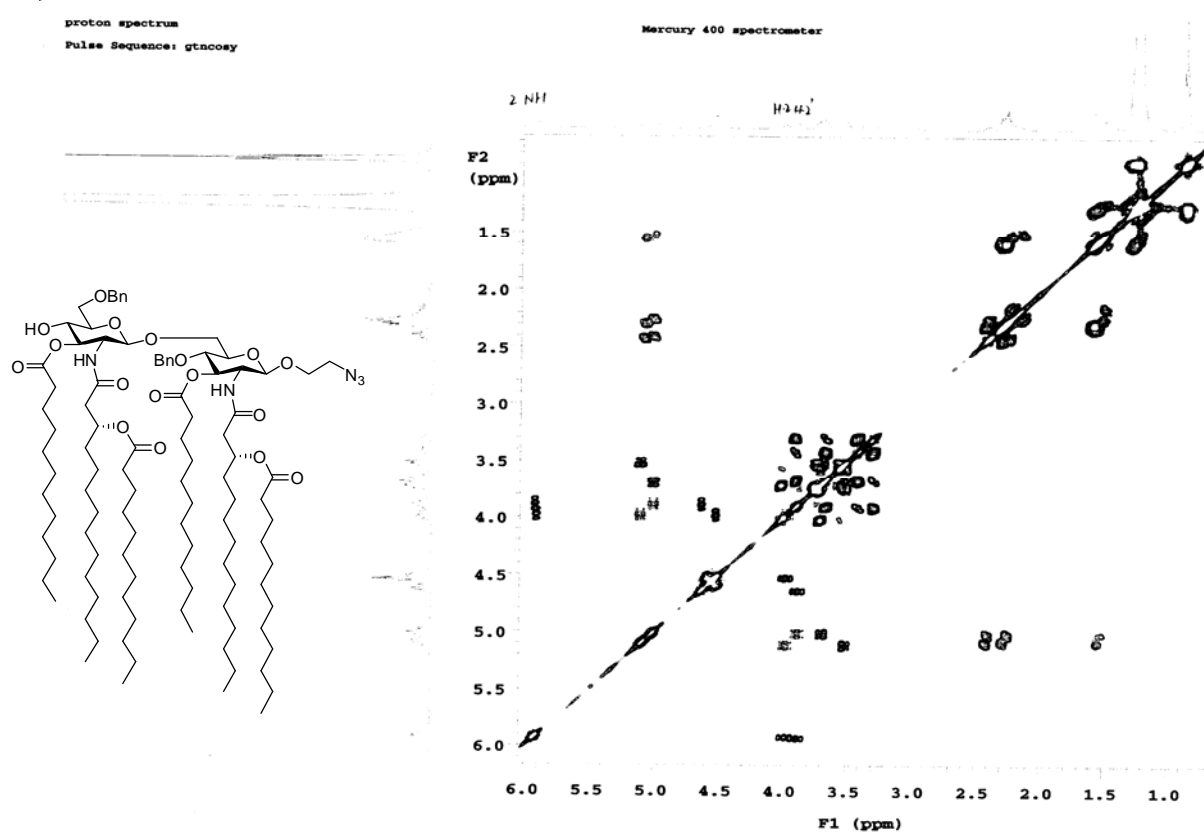



Mercury 400 spectrometer

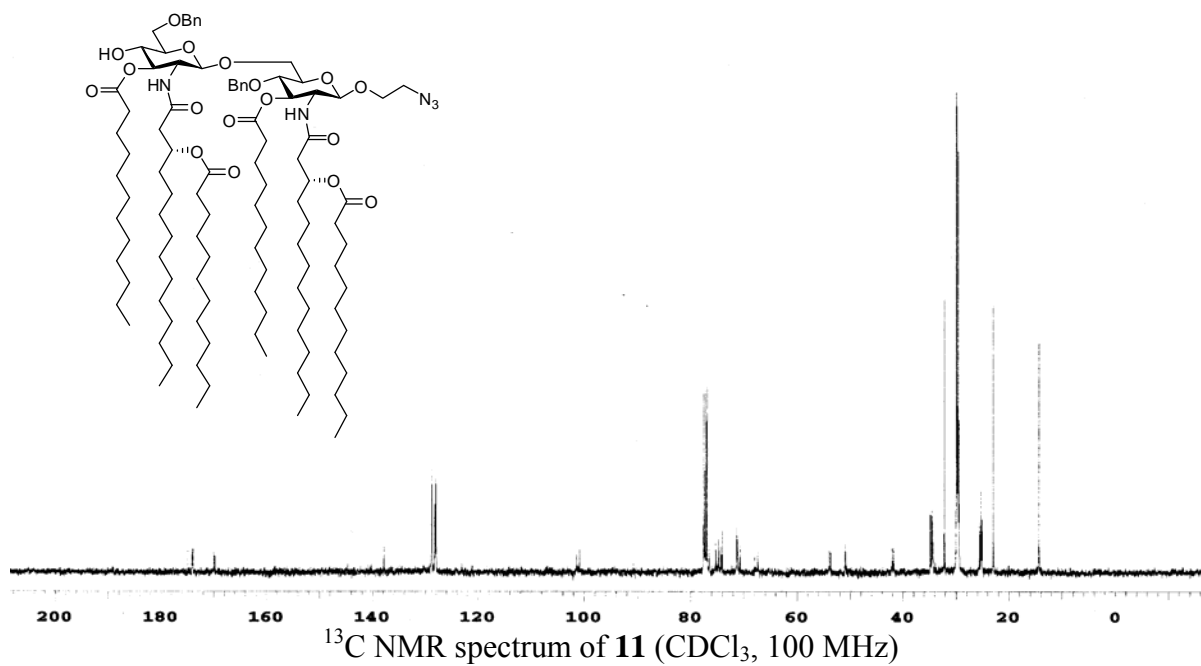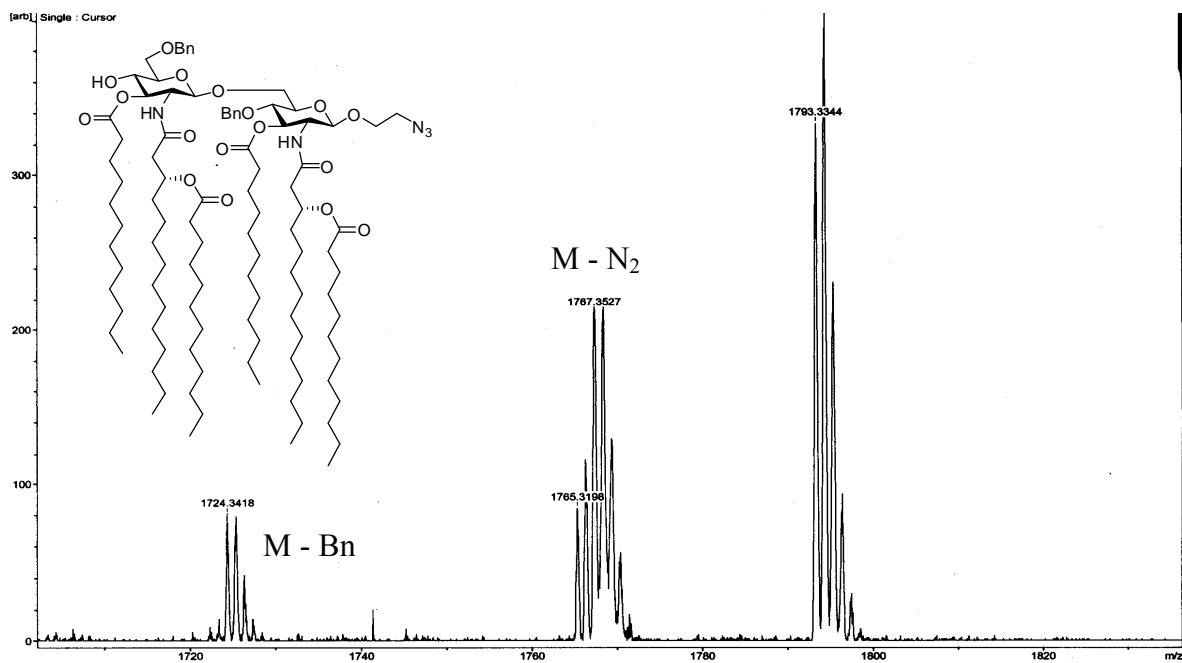

Bruker Daltonics flexControl

Display Screenshot - Generated On 2008-09-25 11h49m56s

MALTI-TOF MS spectrum of **11**

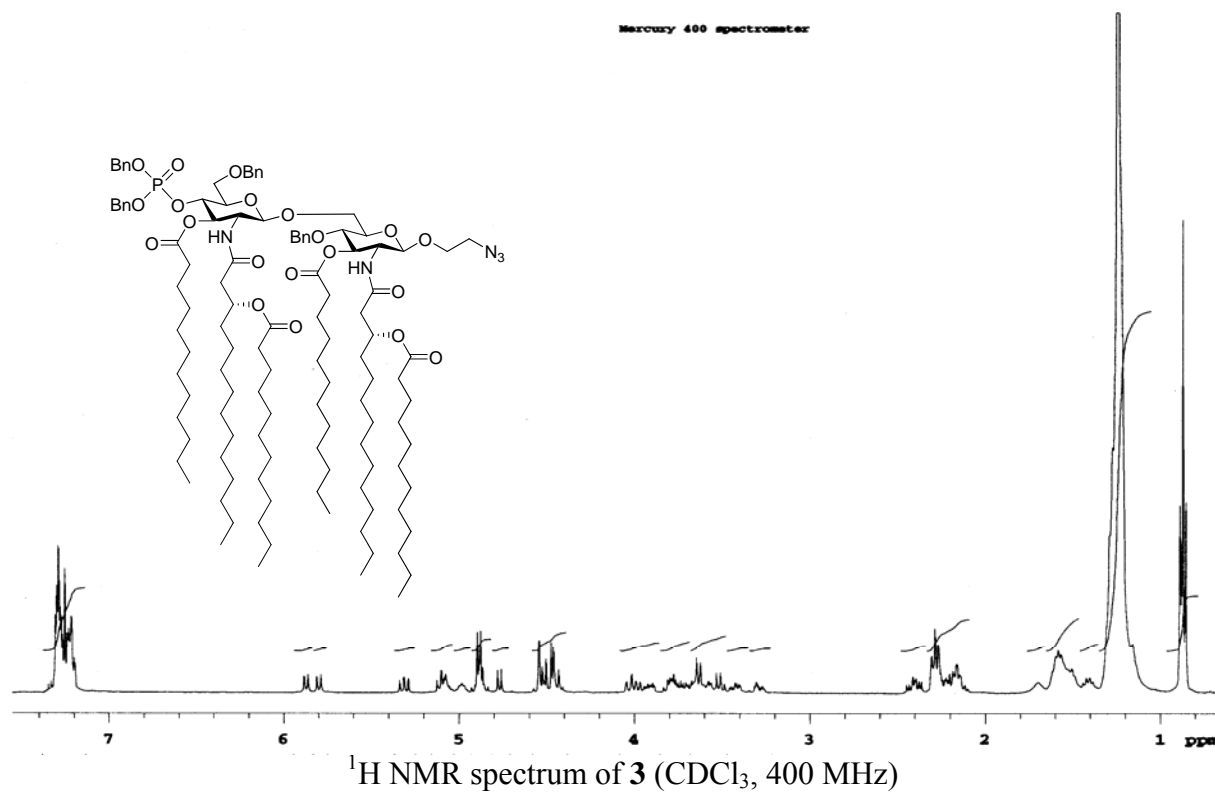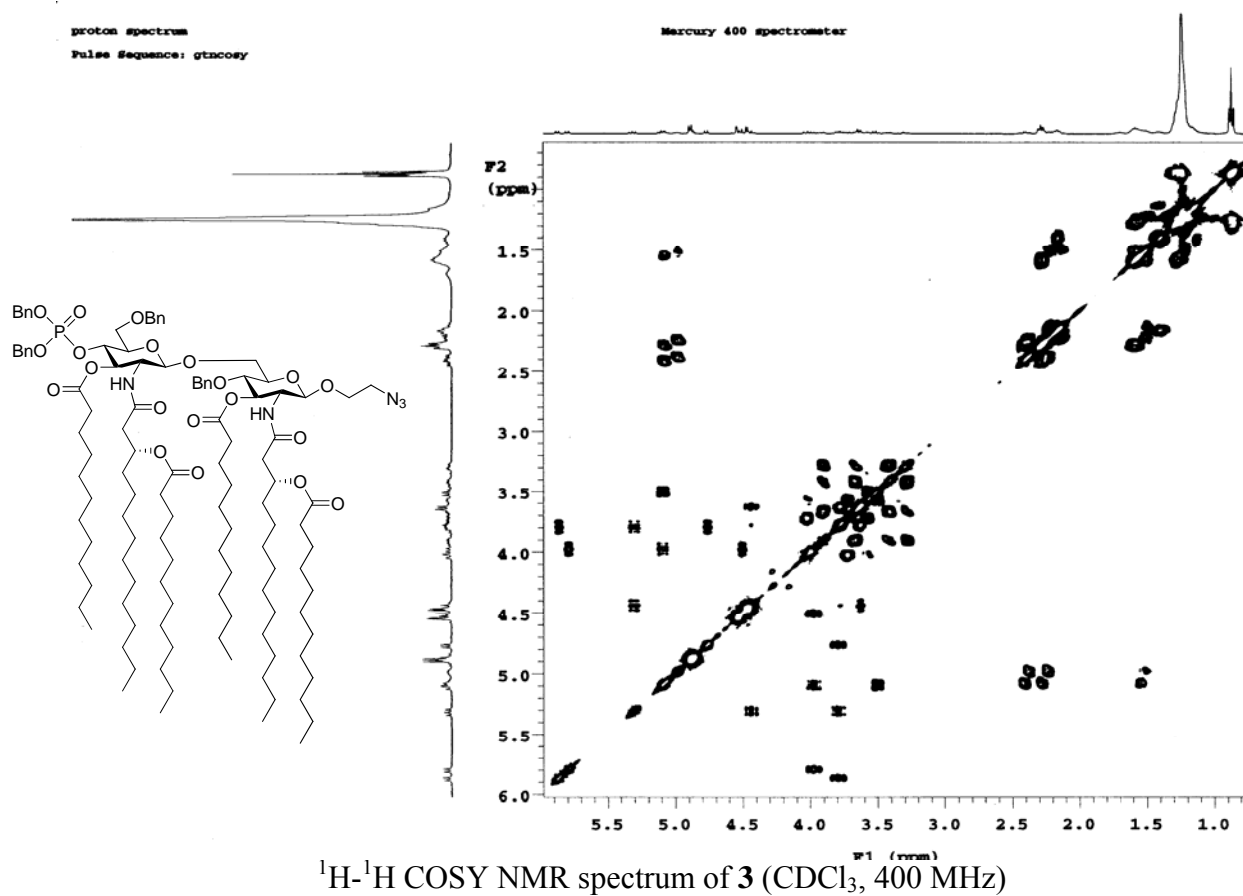

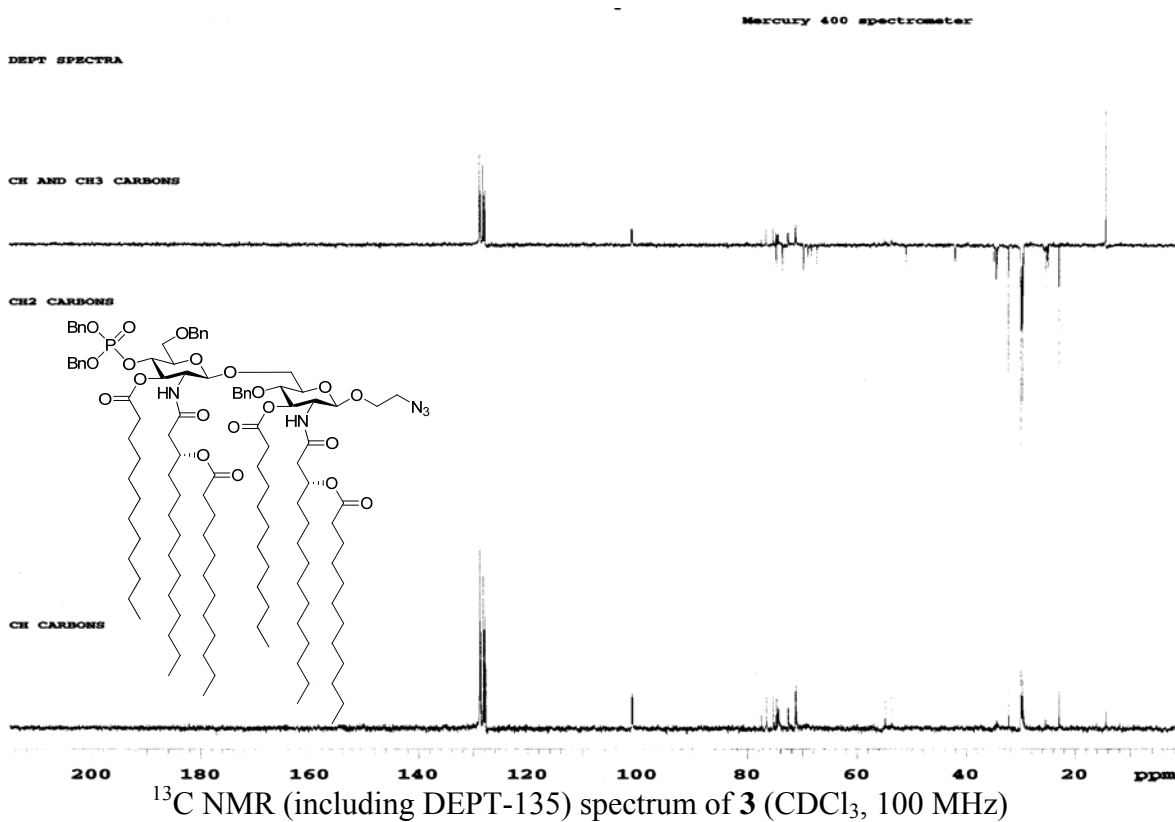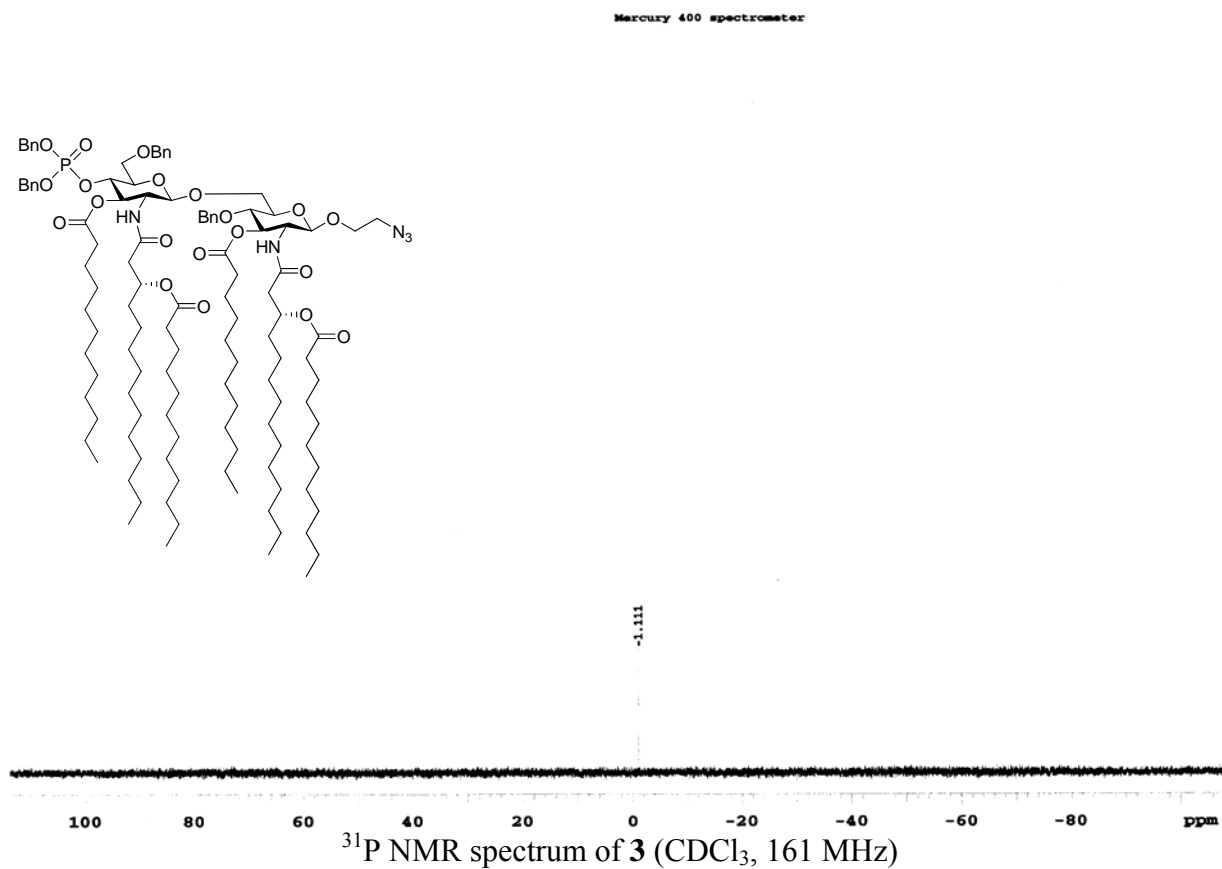

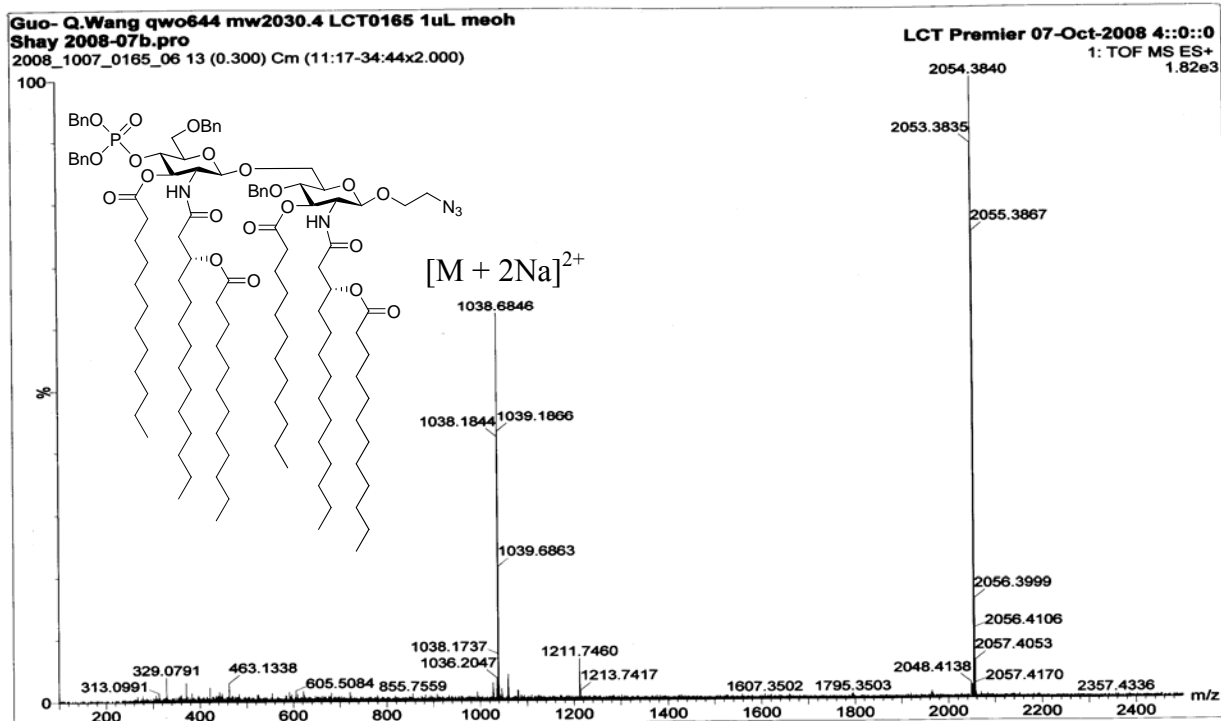

## Elemental Composition Report

### Single Mass Analysis

Tolerance = 7.0 PPM / DBE: min = -1.5, max = 50.0

Element prediction: Off

Number of isotope peaks used for i-FIT = 3

Monoisotopic Mass, Even Electron Ions

629 formula(e) evaluated with 4 results within limits (up to 50 best isotopic matches for each mass)

Elements Used:

C: 0-120 H: 0-200 N: 0-6 O: 0-22 Na: 0-1 P: 0-1

Guo- Q.Wang qwo644 mw2030.4 LCT0165 1uL meoh

Shay 2008-07b.pro

2008\_1007\_0165\_06 13 (0.300) Cm (11:17-34:44x2.000)

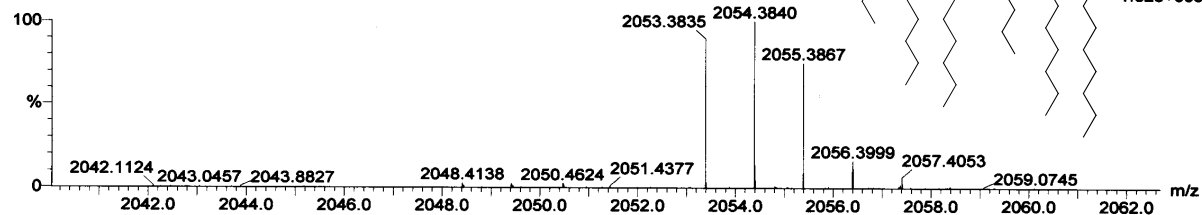

| Minimum:  |            |      |      | -1.5 |       |              |                  |
|-----------|------------|------|------|------|-------|--------------|------------------|
| Maximum:  |            | 5.0  | 7.0  | 50.0 |       |              |                  |
| Mass      | Calc. Mass | mDa  | PPM  | DBE  | i-FIT | i-FIT (Norm) | Formula          |
| 2053.3835 | 2053.3796  | 3.9  | 1.9  | 25.5 | 82.9  | 0.9          | C118 H192 N5 O20 |
|           |            |      |      |      |       |              | Na P             |
| 2053.3820 |            | 1.5  | 0.7  | 28.5 | 83.2  | 1.2          | C120 H191 N5 O20 |
|           |            |      |      |      |       |              | P                |
| 2053.3878 |            | -4.3 | -2.1 | 25.5 | 83.6  | 1.6          | C118 H191 N5 O22 |
|           |            |      |      |      |       |              | Na               |
| 2053.3902 |            | -6.7 | -3.3 | 28.5 | 84.6  | 2.6          | C120 H190 N5 O22 |

HR ESI MS spectrum of **3** (expansion)

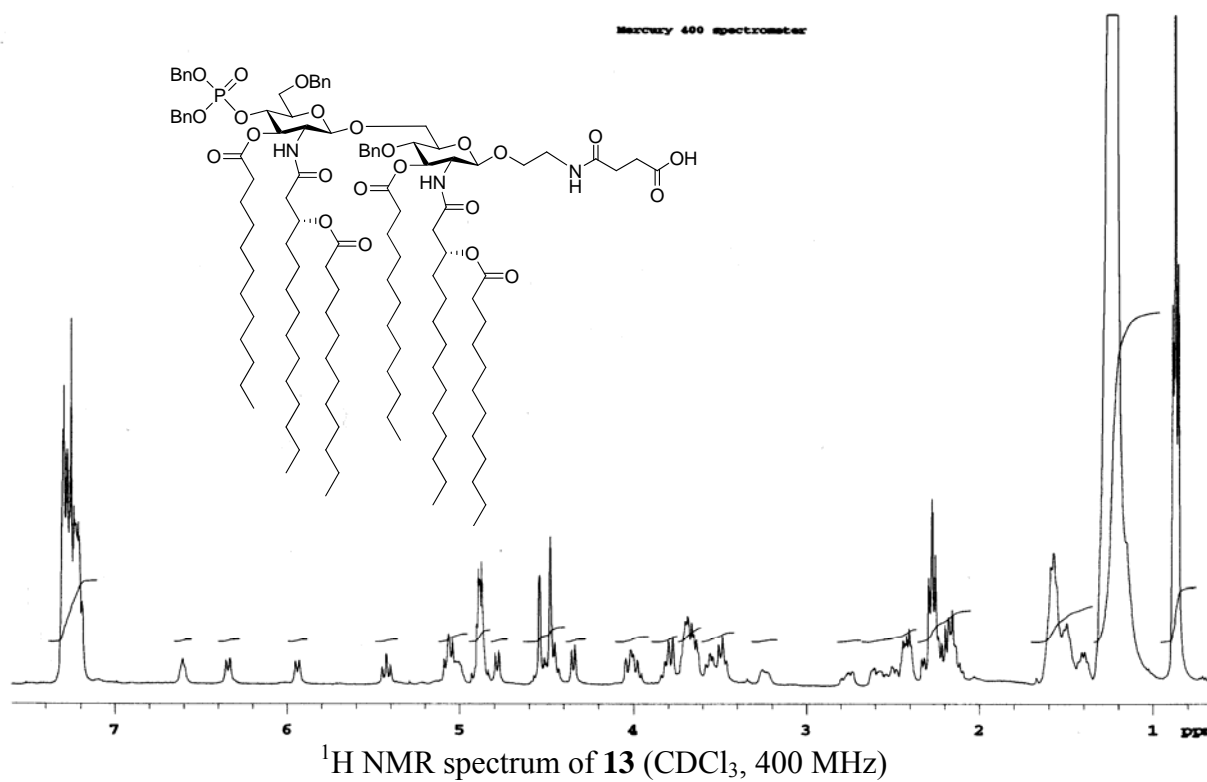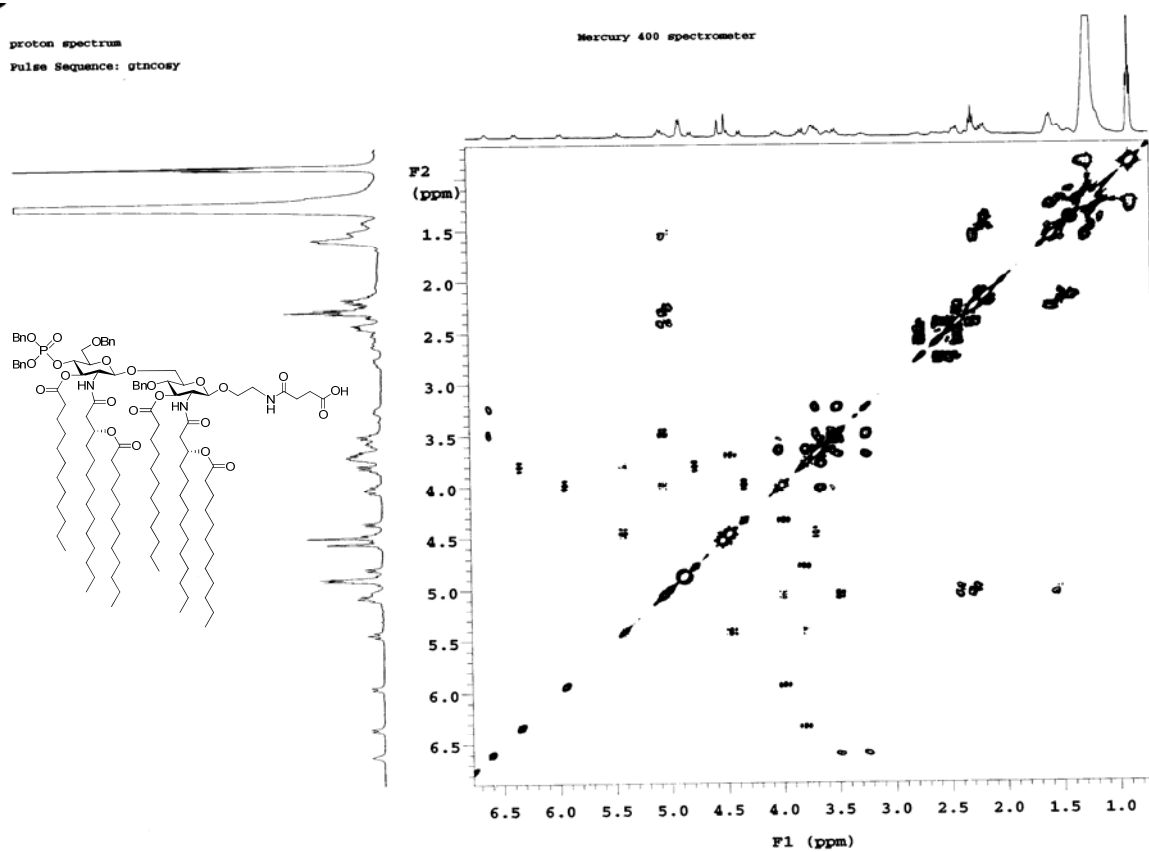

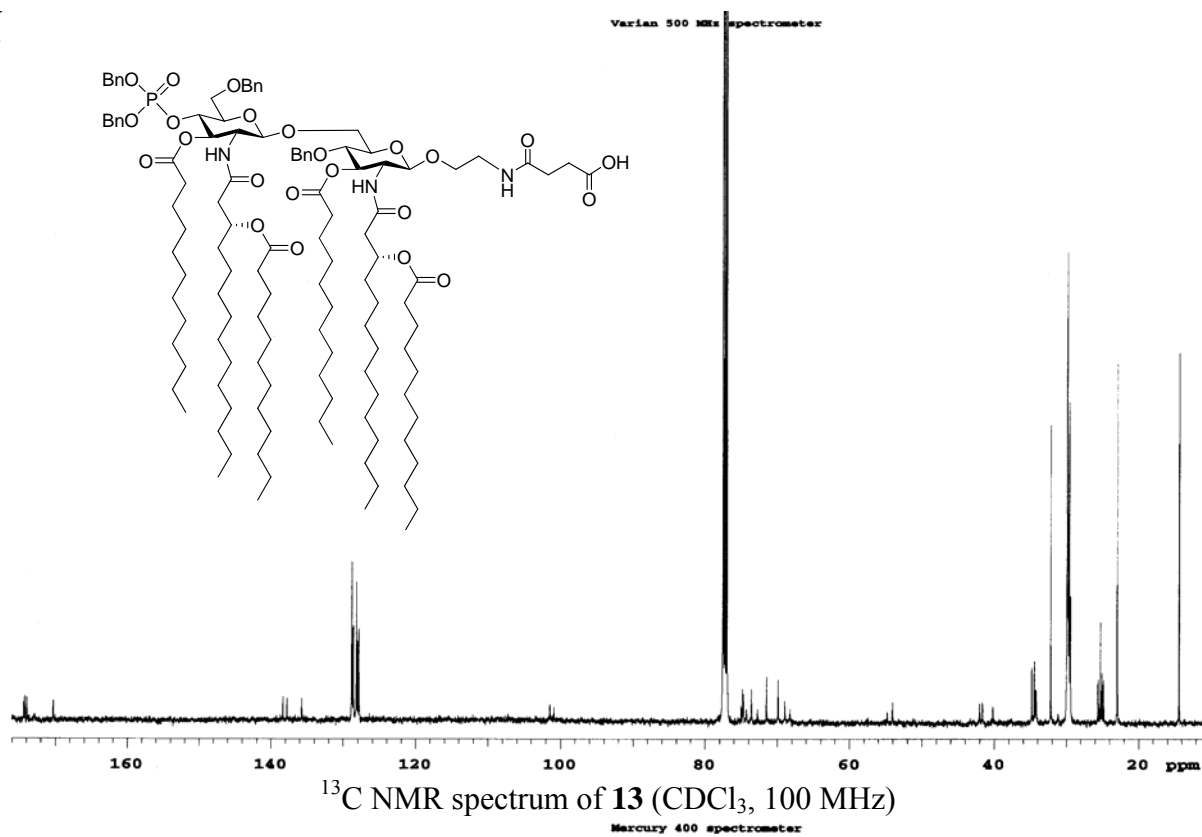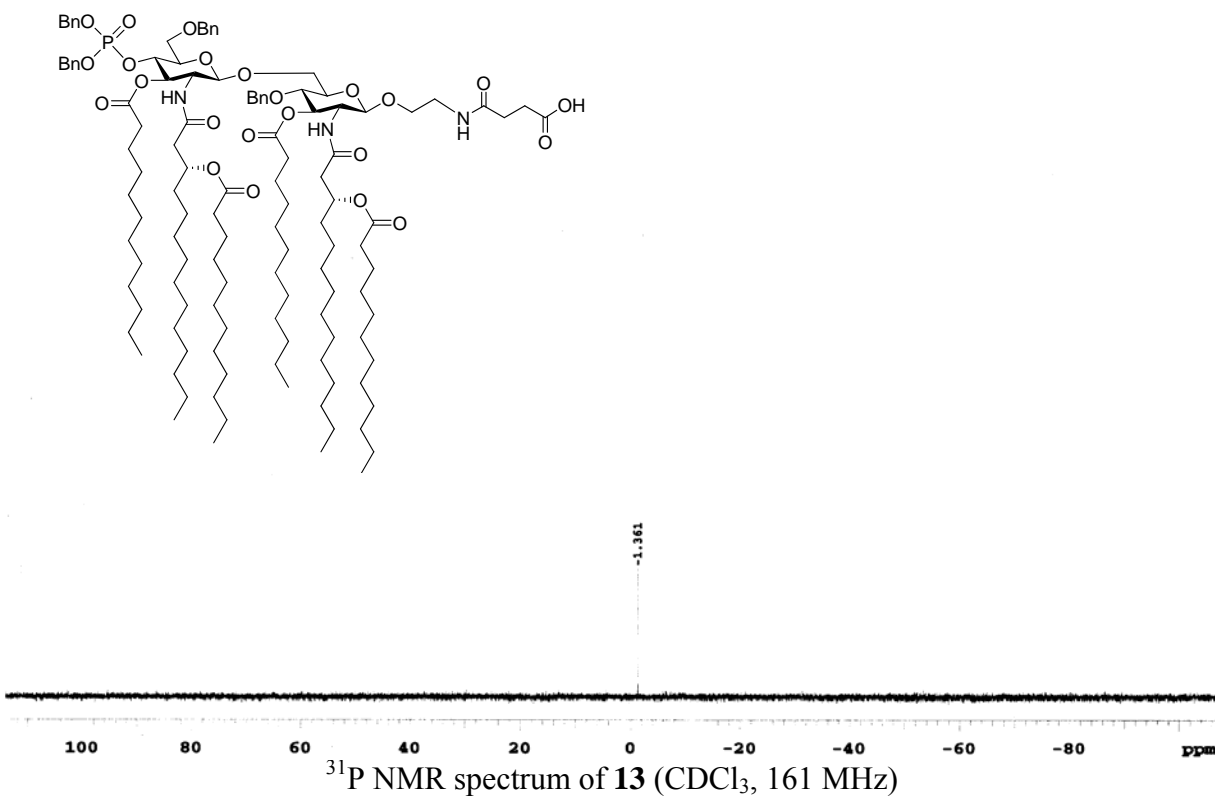

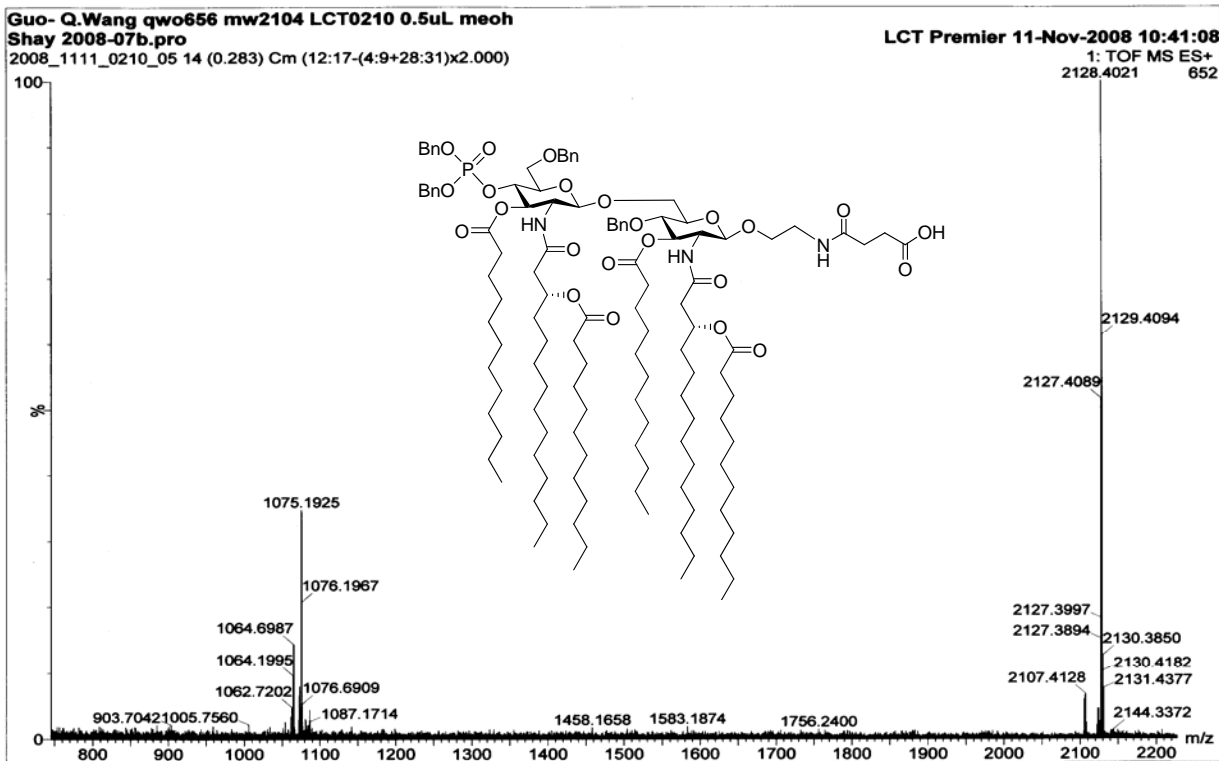

# Elemental Composition Report

## Single Mass Analysis

Tolerance = 5.0 PPM / DBE: min = -1.5, max = 50.0

Element prediction: Off

Number of isotope peaks used for i-FIT = 3

Monoisotopic Mass, Even Electron Ions

364 formula(e) evaluated with 1 results within limits (up to 50 best isotopic matches for each mass)

Elements Used:

C: 0-122 H: 0-200 N: 0-3 O: 0-23 <sup>23</sup>Na: 0-1 P: 0-1

Guo- Q.Wang/qwo656 mw2104 LCT0210 0.5uL meoh

Shay 2008-07b.pro

2008\_1111\_0210\_05 14 (0.283) Cm (12:17-(4:9+28:31)x2.000)

Page 1

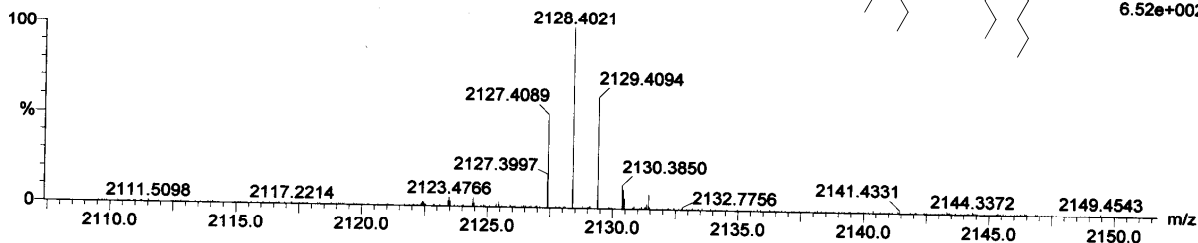

Minimum:

Maximum:

| Mass      | Calc. Mass | mDa | PPM | DBE  | i-FIT | i-FIT (Norm) | Formula                    |
|-----------|------------|-----|-----|------|-------|--------------|----------------------------|
| 2127.4089 | 2127.4051  | 3.8 | 1.8 | 25.5 | 67.6  | 0.0          | C122 H198 N3 O23<br>23Na P |

2127.4089 2127.4051 3.8 1.8 25.5 67.6 0.0 C122 H198 N3 O23  
23Na P

HR ESI MS spectrum of **13** (expansion)

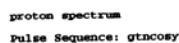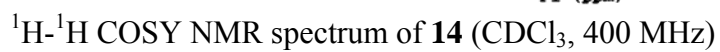



Varian 500 MHz spectrometer  
contain some  $\text{H}_2\text{O}$  and  $\text{ND}_2$

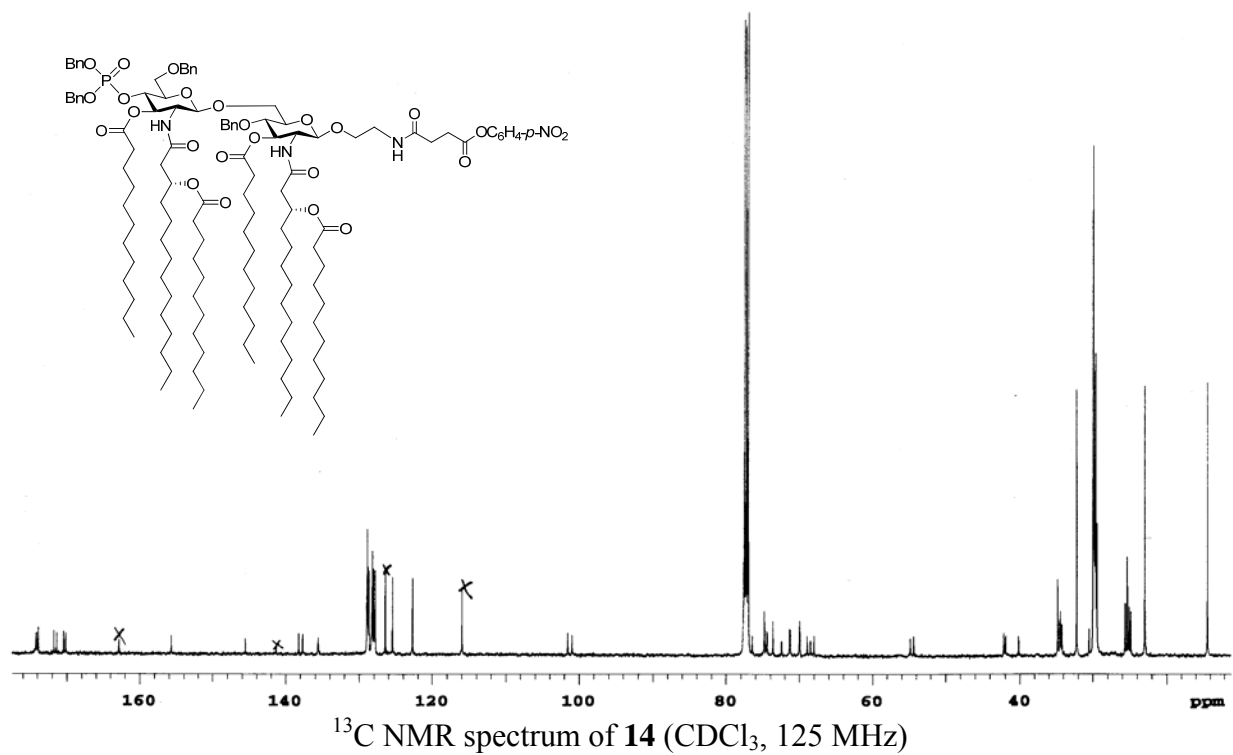

Mercury 400 spectrometer

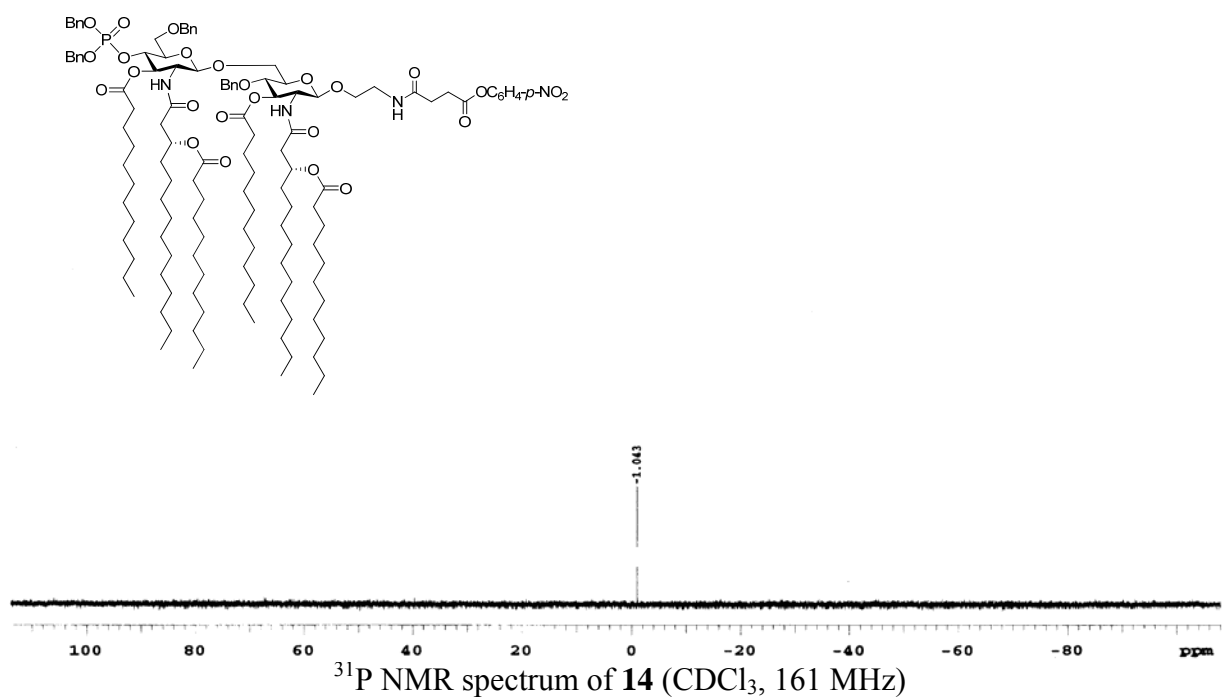

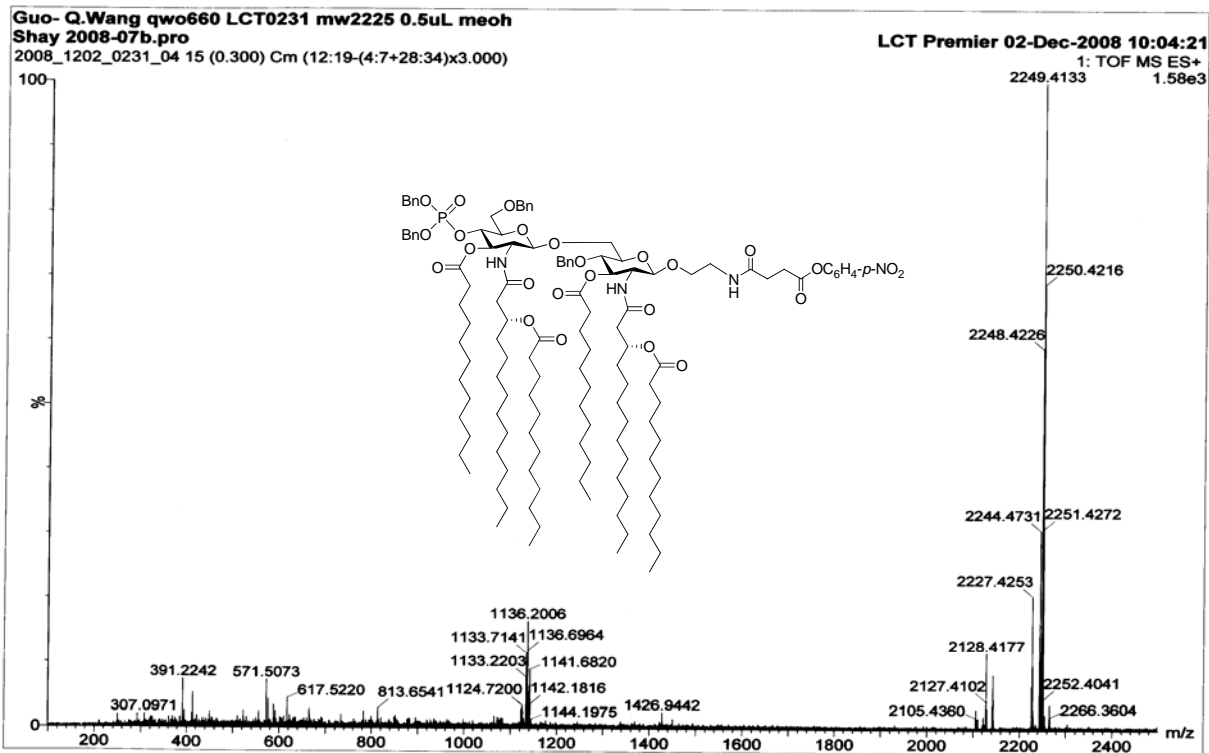

## Elemental Composition Report

### Single Mass Analysis

Tolerance = 5.0 PPM / DBE: min = -1.5, max = 100.0

Element prediction: Off

Number of isotope peaks used for i-FIT = 3

Monoisotopic Mass, Even Electron Ions

468 formula(e) evaluated with 2 results within limits (up to 50 closest results for each mass)

Elements Used:

C: 0-130 H: 0-210 N: 0-4 O: 0-25 <sup>23</sup>Na: 0-1 P: 0-1

Guo- Q.Wang qwo660 LCT0231 mw2225 0.5uL meoh

Shay 2008-07b.pro

2008\_1202\_0231\_04 15 (0.300) Cm (12:19-(4:7+28:34)x3.000)

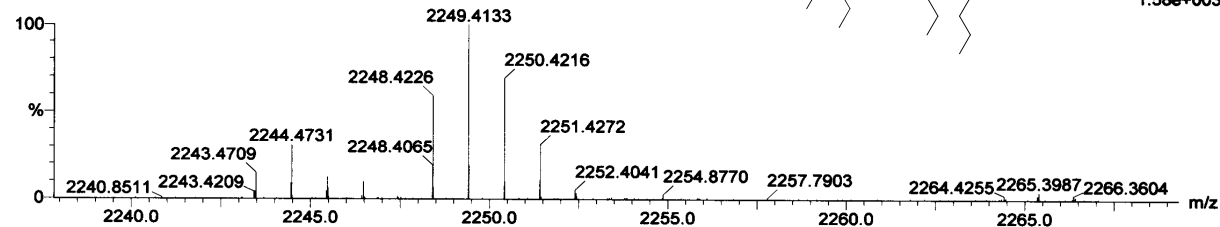

Minimum:  
Maximum:

| Mass      | Calc. Mass | mDa  | PPM  | DBE  | i-FIT | i-FIT (Norm) | Formula                                                            |
|-----------|------------|------|------|------|-------|--------------|--------------------------------------------------------------------|
| 2248.4226 | 2248.4215  | 1.1  | 0.5  | 30.5 | 70.2  | 0.5          | ✓ C <sub>128</sub> H <sub>201</sub> N <sub>4</sub> O <sub>25</sub> |
|           |            |      |      |      |       |              | <sup>23</sup> Na P                                                 |
|           |            |      |      |      |       |              | C <sub>130</sub> H <sub>200</sub> N <sub>4</sub> O <sub>25</sub>   |
| 2248.4239 |            | -1.3 | -0.6 | 33.5 | 70.5  | 0.9          | P                                                                  |

HR ESI MS spectrum of **14** (expansion)

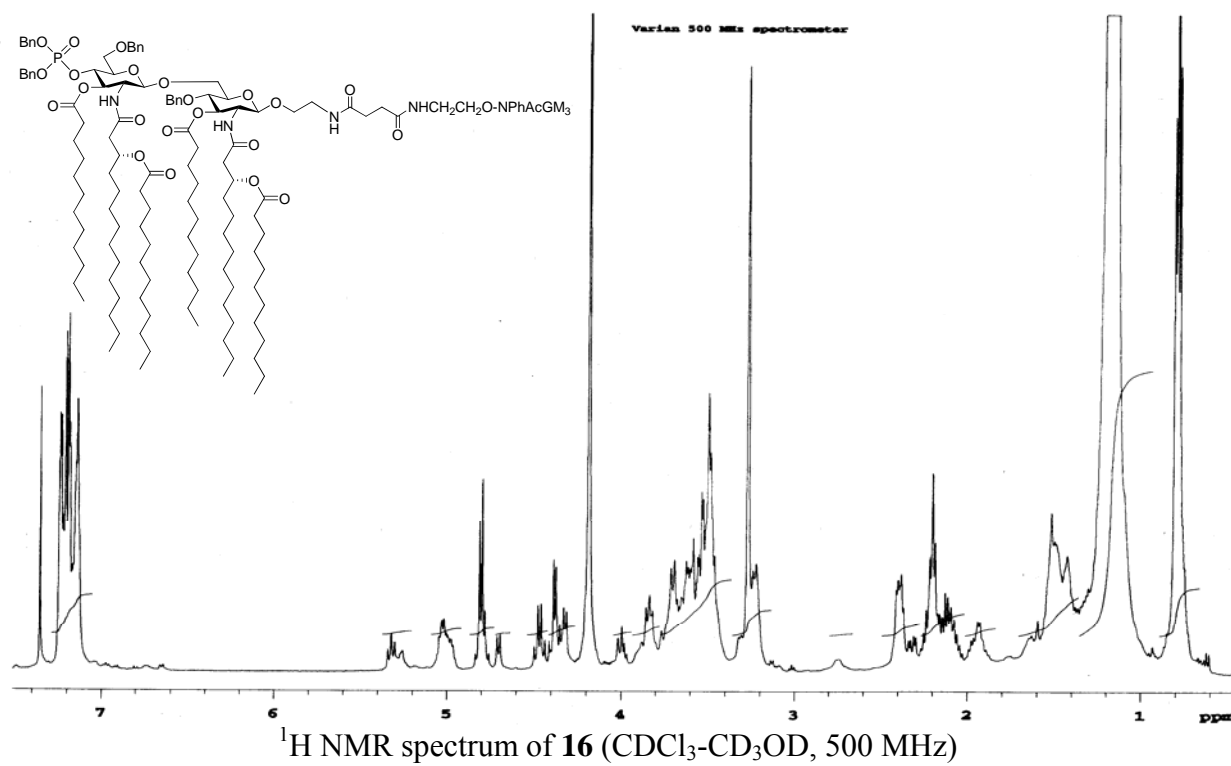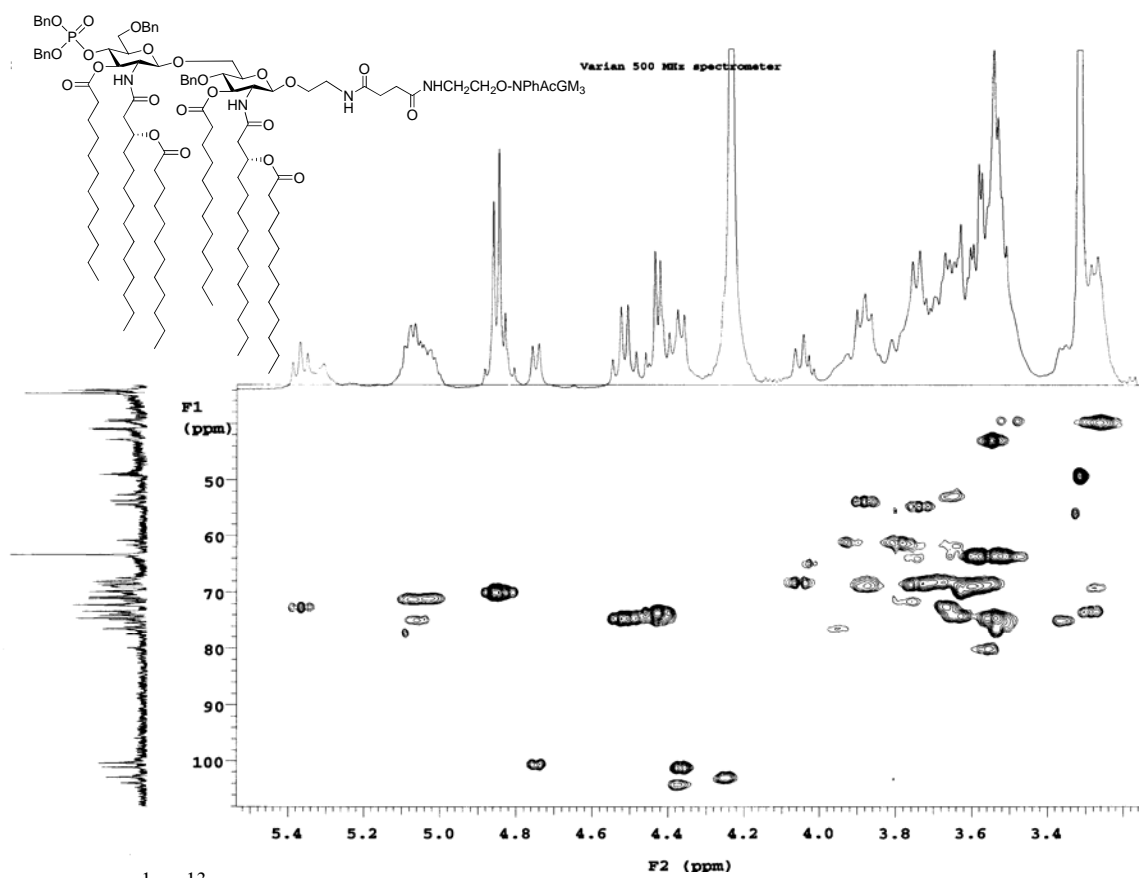

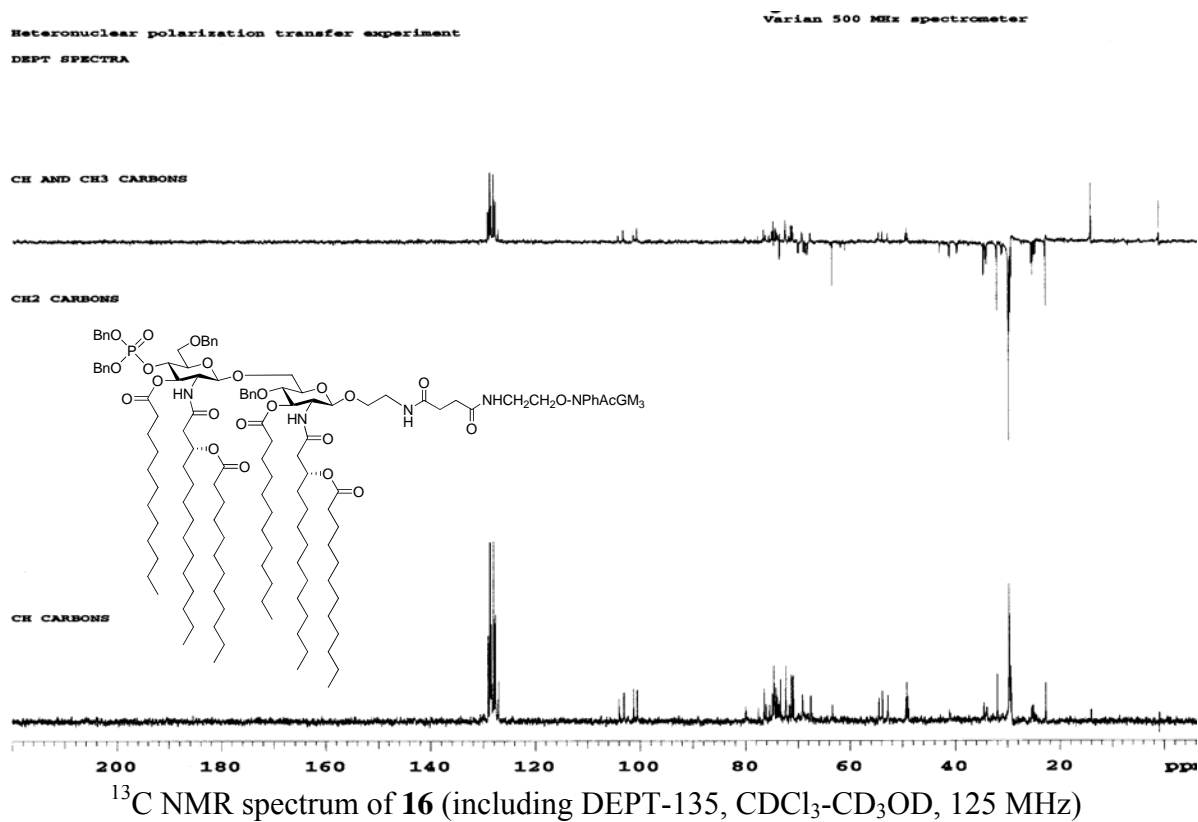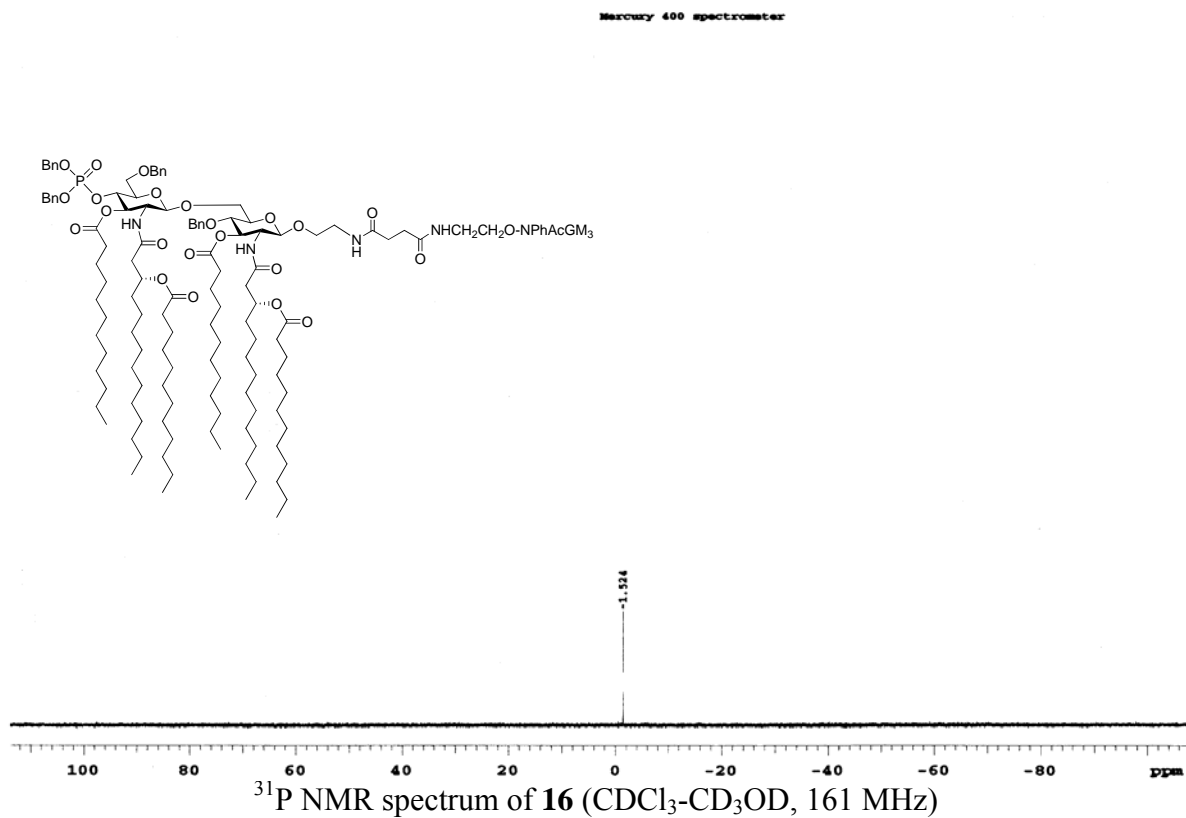

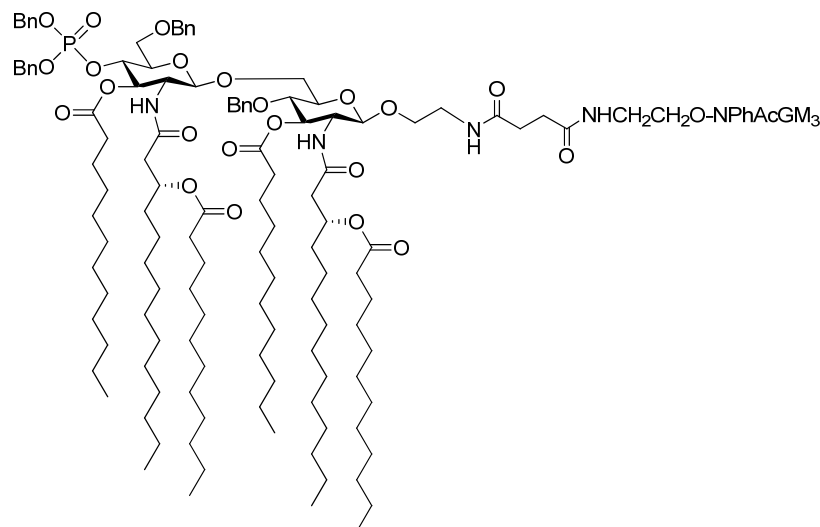

## Elemental Composition Report

Page 1

### Single Mass Analysis

Tolerance = 20.0 PPM / DBE: min = -1.5, max = 100.0

Element prediction: Off

Number of isotope peaks used for i-FIT = 3

Monoisotopic Mass, Odd Electron Ions

1512 formula(e) evaluated with 1 results within limits (up to 50 best isotopic matches for each mass)

Elements Used:

C: 153-153 H: 0-1000 N: 0-5 O: 0-41 <sup>23</sup>Na: 0-2 P: 0-1

Guo- Q.Wang qwo663 LCT0232 mw2838 5uL meoh + Na

Shay 2008-07b.pro

2008\_1202\_0232\_08 16 (0.317) Cm (10:22-(1:7+31:41)x3.000)

LCT Premier 02-Dec-2008 10:25:52

1: TOF MS ES+

3.10e+003

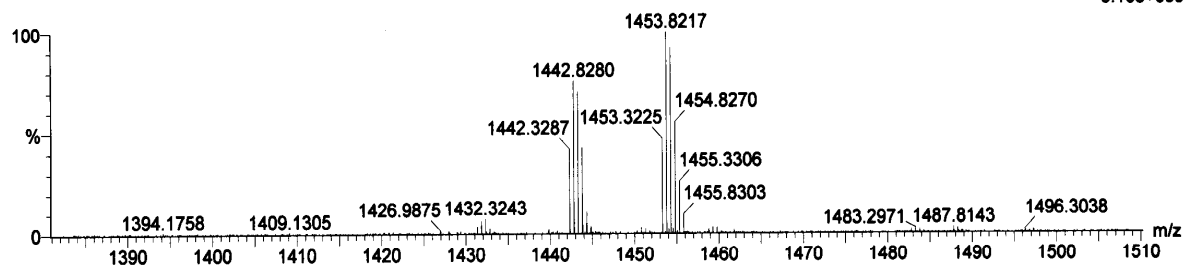

Minimum:

Maximum:

5.0 20.0

-1.5

100.0

| Mass | Calc. Mass | mDa | PPM | DBE | i-FIT | i-FIT (Norm) | Formula |
|------|------------|-----|-----|-----|-------|--------------|---------|
|------|------------|-----|-----|-----|-------|--------------|---------|

|           |           |       |      |      |      |     |                             |
|-----------|-----------|-------|------|------|------|-----|-----------------------------|
| 2884.6574 | 2884.6695 | -12.1 | -4.2 | 34.0 | -1.5 | n/a | C153 H244 N5 O41<br>23Na2 P |
|-----------|-----------|-------|------|------|------|-----|-----------------------------|

HR ESI MS spectrum of **16** (expansion)

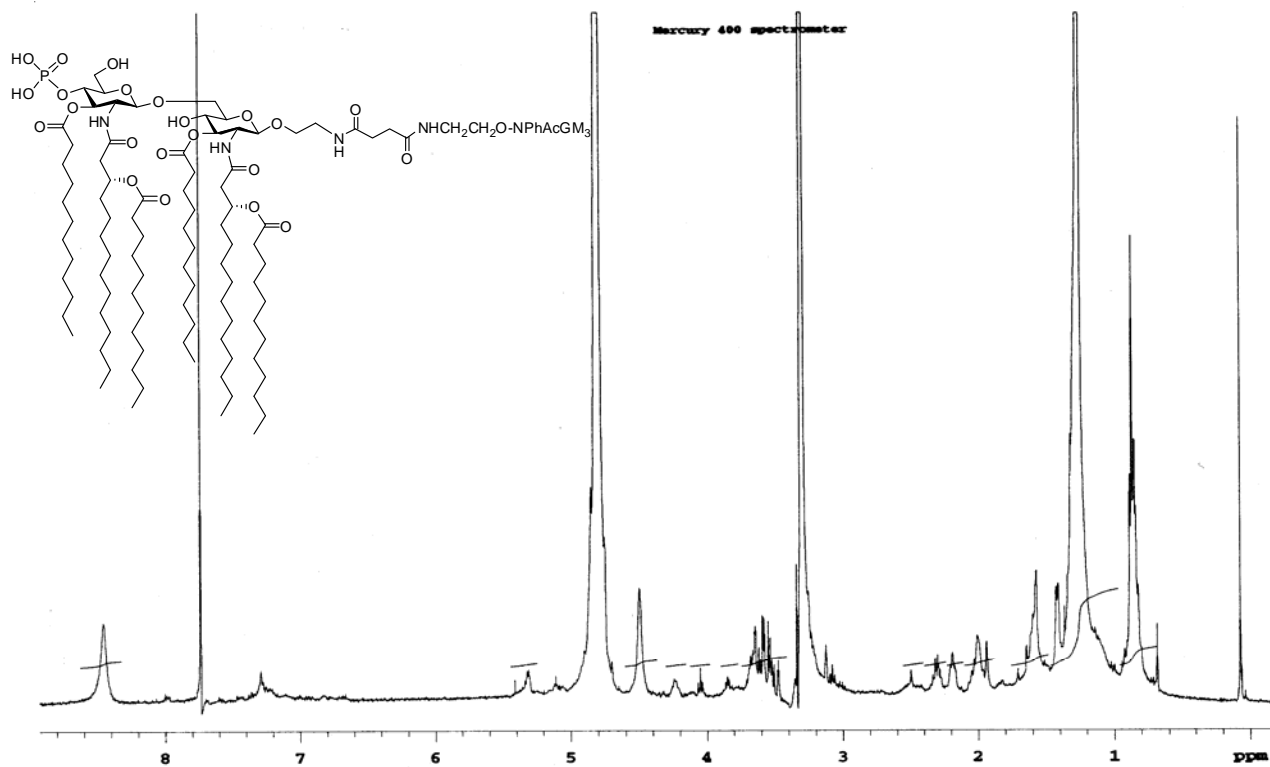

$^1\text{H}$  NMR spectrum of **23** ( $\text{CDCl}_3\text{-CD}_3\text{OD}$ , 400 MHz)

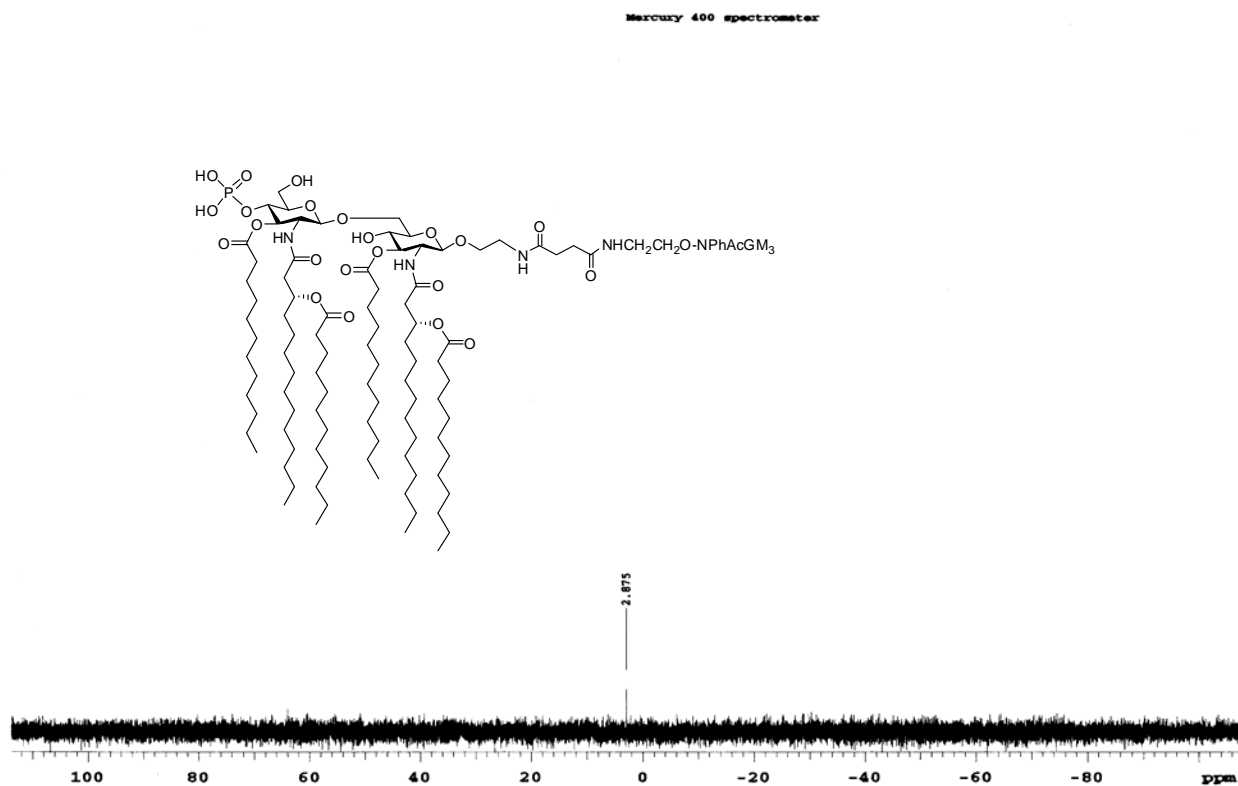

$^{31}\text{P}$  NMR spectrum of **23** ( $\text{CDCl}_3\text{-CD}_3\text{OD}$ , 161 MHz)
